# Supplementary material for: HUWE1 is a critical colonic tumour suppressor gene that prevents MYC signalling, DNA damage accumulation and tumour initiation
Source: PubMed Central journal article supplement (PMC5286368; doi:10.15252/emmm.201606684), 2016-12-22
Supplement: EMMM-9-181-s001.pdf [file EMMM-9-181-s001.pdf]

## **Appendix**

### **Supplemental experimental procedures**

**Table S1**

**Table S2**

## Supplemental Experimental Procedures

### Primary antibodies

The following primary antibodies were used for immunohistochemistry:  $\beta$ -catenin (1:50; Transduction Laboratories), BrdUrd (1:500; BD Biosciences), c-MYC (1:200; Santa Cruz sc-764), Caspase 3 (1:800; R&D Systems AF835), Lysozyme (1:200; DAKO A0099), MMP7 (1:200; Santa Cruz sc-8832), OLFM4 (1:200, Abcam ab85046) and  $\gamma$ H2AX (1:2500; Upstate 05636).

### Western blotting

Primary antibodies used for Western blotting were as follows:  $\gamma$ H2AX (1:200; Cell Signalling Technologies 9718), MYC (1:100; Cell Signaling Technology 5605), MCL1 (1:500; Rockland 600-401-394S) H2AX (1:2000; Cell Signaling Technology 7631) and  $\beta$ -actin (1:5000; Cell Signaling Technology 4970).

### Apc LOH primers

|          |                              |
|----------|------------------------------|
| Apc wt F | GTTCTGTATCATGGAAAGATAGGTGGTC |
| Apc wt R | CACTCAAACGCTTTTGAGGGTTGATT   |
| Apc KO F | GTTCTGTATCATGGAAAGATAGGTGGTC |
| Apc KO R | GAGTACGGGGTCTCTGTCTCAGTGAA   |

### RNA isolation

We isolated RNA from whole tissue pieces using a Qiagen RNeasy Mini Kit (Qiagen, Crawley, West Sussex, UK) according to the manufacturer's instructions. We used DNA-free (Ambion/Applied Biosystems, Warrington, UK) to digest genomic DNA contamination from the RNA samples prior to RT-PCR.

### Quantitative PCR

We reverse transcribed 0.5 $\mu$ g of RNA using a DyNAmo SYBR Green 2-step qPCR kit (Finnzymes, Espoo, Finland) in a reaction volume of 20 $\mu$ l. qPCR was performed in duplicate in a 20  $\mu$ l reaction mixture containing 10  $\mu$ l of 2  $\times$  DyNAmo HS master mix, 0.5  $\mu$ M of each of the primers and 0.1  $\mu$ l cDNA. The reaction mixture without a template was run as a control. The cycling conditions were as follows: 95°C for 15 min, followed by 40 cycles of three steps consisting of denaturation at 94°C for 15 s, primer annealing at the optimal temperature for 30s, and primer extension at 72°C for 30s.  $\beta$ -actin was used to normalize for differences in RNA input.

### cBioportal data analysis

cBioportal data was analysed using the available search function. For determining *HUWE1* mutation rate a simple search was carried out for HUWE1 either with the cancer type section left empty or selecting Colorectal Adenocarcinoma (TCGA, Nature 2012) or Colorectal Adenocarcinoma (Genentech, Nature 2012). For mutual exclusivity analysis the following search criteria were used:

Colorectal Adenocarcinoma (TCGA, Nature 2012)/ Tumors with sequencing and CNA data (212)/User-defined List/2 genes, mRNA Expression z-Scores (RNA Seq RPKM)

HUWE1

MYC: AMP GAIN EXP>2

### **Tumour culture**

For Western blot analysis we cultured individual tumours to remove contaminating stromal tissue. Individual tumours were isolated, chopped into small pieces and washed with PBS, then PBS + 1mM EDTA. Tumours were then digested with 5% Trypsin for 30min at 37°C. Digestion was stopped by addition of 5% FBS and cells isolated by passing through a 40µm filter. Cells were pelleted at 300g and washed 3 times with Advanced DMEM/F12 media + Pen/Strep + L-glutamine + Hepes. Single cells were resuspended in matrigel and plated in a 24 well plate (25µl / well). 500 µl media supplemented with N2, B27, EGF (50ng/ml) and Noggin (100ng/ml) was added. Spheres were passaged every 3-4 days for a minimum of 2 weeks to remove contaminating cells.

### **Image analysis**

For nuclear β-catenin analysis intestinal slides stained for β-catenin were scanned on an SCN400F slide scanner (Leica). The files were exported and analysed in HALO v2.0 image analysis software (Indica Labs). The tumour borders were manually identified and the resulting tumour areas were segregated using the “classifier” module to identify epithelial cells. CytoNuclear v1.5 analysis was carried out to identify and quantify nuclear positive epithelial cells. Thresholds and parameters were set manually.

Table S1.

| Gene Symbol                   | Gene Title                                       | p-value(Hu | qvalue(p-v: | Fold-Change(Huwe1 KC |
|-------------------------------|--------------------------------------------------|------------|-------------|----------------------|
| Lgals6                        | lectin, galactose binding, soluble 6             | 1,03E-06   | 0,0155407   | -97,737              |
| Gm10499 /// Gm8909            | predicted gene 10499 /// predicted gene 8909     | 3,10E-05   | 0,0726097   | -61,1337             |
| H2-T3                         | histocompatibility 2, T region locus 3           | 0,0006942  | 0,0849322   | -19,3552             |
| Slc34a2                       | solute carrier family 34 (sodium phosphate), r   | 0,0001444  | 0,0831415   | -11,3813             |
| H2-T18 /// H2-T3 /// LOC100   | histocompatibility 2, T region locus 18 /// hist | 0,0004742  | 0,0849322   | -10,8219             |
| H2-T18                        | histocompatibility 2, T region locus 18          | 0,0006172  | 0,0849322   | -7,88783             |
| Gsta2                         | glutathione S-transferase, alpha 2 (Yc2)         | 0,0001261  | 0,0805578   | -6,90287             |
| Tmigd1                        | transmembrane and immunoglobulin domain          | 0,0298512  | 0,243554    | -5,8898              |
| Ddah1                         | dimethylarginine dimethylaminohydrolase 1        | 0,0002266  | 0,0849322   | -5,01368             |
| Cryz                          | crystallin, zeta                                 | 0,0003398  | 0,0849322   | -4,87342             |
| Wdpcp                         | WD repeat containing planar cell polarity effe   | 0,0003048  | 0,0849322   | -4,29598             |
| Sprr2a1 /// Sprr2a2           | small proline-rich protein 2A1 /// small proline | 0,0057706  | 0,150585    | -4,22789             |
| Scd1                          | stearoyl-Coenzyme A desaturase 1                 | 0,0028046  | 0,124286    | -4,11411             |
| ---                           | ---                                              | 0,0019685  | 0,114711    | -4,11282             |
| Ddah1                         | dimethylarginine dimethylaminohydrolase 1        | 0,0011405  | 0,0968114   | -3,82635             |
| Fut2                          | fucosyltransferase 2                             | 0,0440907  | 0,272416    | -3,62498             |
| Ddah1                         | dimethylarginine dimethylaminohydrolase 1        | 0,0007096  | 0,0849322   | -3,51672             |
| Hspa1b                        | heat shock protein 1B                            | 0,018445   | 0,212189    | -3,51284             |
| Acot6                         | acyl-CoA thioesterase 6                          | 0,0001318  | 0,0805578   | -3,48896             |
| Paqr7                         | progesterin and adipoQ receptor family membe     | 0,0234486  | 0,227833    | -3,39741             |
| Bcl2l15                       | BCL2-like 15                                     | 0,01067    | 0,181461    | -3,3333              |
| Paqr8                         | progesterin and adipoQ receptor family membe     | 0,0085473  | 0,169883    | -3,27393             |
| 5430410E06Rik                 | RIKEN cDNA 5430410E06 gene                       | 0,0024577  | 0,120058    | -3,25517             |
| H2-K1                         | Histocompatibility 2, K1, K region               | 0,0014104  | 0,103881    | -3,2252              |
| Mboat1                        | membrane bound O-acyltransferase domain c        | 0,0227844  | 0,225899    | -3,15455             |
| Npl                           | N-acetylneuraminate pyruvate lyase               | 0,0183529  | 0,212171    | -3,15435             |
| Igf2                          | insulin-like growth factor 2                     | 0,0023157  | 0,119793    | -3,15258             |
| Tspan12                       | tetraspanin 12                                   | 0,0091005  | 0,17254     | -3,15063             |
| Cryz                          | crystallin, zeta                                 | 0,0062013  | 0,153771    | -3,11286             |
| Sqrdl                         | sulfide quinone reductase-like (yeast)           | 0,008216   | 0,169111    | -3,08814             |
| Ear12 /// Ear2 /// Ear3       | eosinophil-associated, ribonuclease A family, r  | 0,0014789  | 0,104066    | -3,05865             |
| H2-T18 /// H2-T3 /// H2-T3-   | histocompatibility 2, T region locus 18 /// hist | 0,0051949  | 0,14802     | -3,00127             |
| Serpinb5                      | serine (or cysteine) peptidase inhibitor, clade  | 0,0497946  | 0,282091    | -2,98913             |
| Adamts4                       | a disintegrin-like and metallopeptidase (repro   | 0,0051459  | 0,147369    | -2,92373             |
| Paqr8                         | progesterin and adipoQ receptor family membe     | 0,0087622  | 0,170577    | -2,89824             |
| Fst                           | follistatin                                      | 0,0036452  | 0,132023    | -2,8663              |
| Scd1                          | stearoyl-Coenzyme A desaturase 1                 | 0,0089727  | 0,171687    | -2,81649             |
| Pigl                          | phosphatidylinositol glycan anchor biosynthes    | 6,77E-05   | 0,0726097   | -2,77852             |
| Krt12                         | keratin 12                                       | 0,0219451  | 0,223509    | -2,76459             |
| Clca2                         | chloride channel calcium activated 2             | 0,0015887  | 0,105787    | -2,71003             |
| ---                           | ---                                              | 0,0007136  | 0,0849322   | -2,70592             |
| Afm                           | afamin                                           | 0,0253435  | 0,231521    | -2,69487             |
| Serpinb5                      | serine (or cysteine) peptidase inhibitor, clade  | 0,0050423  | 0,146373    | -2,60552             |
| Bglap /// Bglap-rs1 /// Bglap | bone gamma carboxyglutamate protein /// bc       | 0,0196463  | 0,215905    | -2,59842             |
| Nipal2                        | NIPA-like domain containing 2                    | 0,0002314  | 0,0849322   | -2,59551             |
| Anxa10                        | annexin A10                                      | 0,0498026  | 0,282091    | -2,59325             |
| Ccl28                         | chemokine (C-C motif) ligand 28                  | 0,001434   | 0,103881    | -2,59184             |
| S100a14                       | S100 calcium binding protein A14                 | 0,0439254  | 0,271976    | -2,57668             |
| Serpinb5                      | serine (or cysteine) peptidase inhibitor, clade  | 0,0230467  | 0,226843    | -2,57544             |
| Nbea                          | neurobeachin                                     | 0,0005098  | 0,0849322   | -2,56888             |
| Gas5                          | growth arrest specific 5                         | 0,0005989  | 0,0849322   | -2,546               |

Table S1.

|                                      |                                                             |           |           |          |
|--------------------------------------|-------------------------------------------------------------|-----------|-----------|----------|
| <b>Angptl4</b>                       | angiotensin-converting enzyme 1-like 4                      | 0,0290568 | 0,24078   | -2,53693 |
| <b>Slc5a8</b>                        | solute carrier family 5 (iodide transporter), member 8      | 0,0362388 | 0,258831  | -2,5167  |
| <b>Ighm</b>                          | Immunoglobulin heavy constant mu                            | 0,0322166 | 0,251226  | -2,51091 |
| <b>H2-Ea-ps</b>                      | histocompatibility 2, class II antigen E alpha, polymorphic | 0,0278623 | 0,237798  | -2,47887 |
| <b>5830477G23Rik</b>                 | RIKEN cDNA 5830477G23 gene                                  | 0,0118737 | 0,186339  | -2,45407 |
| <b>Cyp4a10 /// Cyp4a31</b>           | cytochrome P450, family 4, subfamily a, polypeptide 10      | 0,0021308 | 0,117205  | -2,43751 |
| <b>Paqr8</b>                         | progesterone and adiponectin receptor family member 8       | 0,0117936 | 0,185884  | -2,43539 |
| <b>Tcf23</b>                         | transcription factor 23                                     | 0,0181546 | 0,211065  | -2,43392 |
| <b>Lpl</b>                           | lipoprotein lipase                                          | 0,0013627 | 0,103163  | -2,42047 |
| <b>Chst4</b>                         | carbohydrate (chondroitin 6/keratan) sulfotransferase 4     | 0,0227066 | 0,225899  | -2,406   |
| <b>Gkn3</b>                          | gastrokin 3                                                 | 0,0042348 | 0,1385    | -2,39984 |
| <b>1190003J15Rik</b>                 | RIKEN cDNA 1190003J15 gene                                  | 3,31E-05  | 0,0726097 | -2,39012 |
| <b>Ccl28</b>                         | chemokine (C-C motif) ligand 28                             | 0,0026284 | 0,122879  | -2,37616 |
| <b>Ccdc21</b>                        | coiled-coil domain containing 21                            | 0,0089292 | 0,171277  | -2,37282 |
| <b>Gm3579</b>                        | predicted gene 3579                                         | 0,0135961 | 0,192995  | -2,37075 |
| <b>Pla2g5</b>                        | phospholipase A2, group V                                   | 0,0005926 | 0,0849322 | -2,36881 |
| <b>Il1rn</b>                         | interleukin 1 receptor antagonist                           | 0,0015569 | 0,104987  | -2,35744 |
| ---                                  | ---                                                         | 0,0048519 | 0,14496   | -2,34325 |
| <b>Alox15</b>                        | arachidonate 15-lipoxygenase                                | 0,0197756 | 0,216393  | -2,33624 |
| <b>A730091E23Rik</b>                 | RIKEN cDNA A730091E23 gene                                  | 0,0003276 | 0,0849322 | -2,29534 |
| <b>Amph</b>                          | amphiphysin                                                 | 0,0023596 | 0,119793  | -2,28775 |
| <b>Paqr8</b>                         | progesterone and adiponectin receptor family member 8       | 0,0237617 | 0,228298  | -2,28207 |
| <b>Ivd</b>                           | isovaleryl coenzyme A dehydrogenase                         | 0,0013932 | 0,103789  | -2,26468 |
| <b>1700029I01Rik /// Gm13139</b>     | RIKEN cDNA 1700029I01 gene /// predicted gene               | 0,0127594 | 0,189985  | -2,25087 |
| <b>1190003J15Rik</b>                 | RIKEN cDNA 1190003J15 gene                                  | 0,0037283 | 0,132928  | -2,24832 |
| <b>Haus2</b>                         | HAUS augmin-like complex, subunit 2                         | 0,022045  | 0,22382   | -2,24405 |
| <b>Ldhd</b>                          | lactate dehydrogenase B                                     | 0,045811  | 0,275912  | -2,24215 |
| <b>Zdhhc2</b>                        | zinc finger, DHH domain containing 2                        | 0,0037039 | 0,132893  | -2,24205 |
| <b>Akr1b8</b>                        | aldo-keto reductase family 1, member B8                     | 0,0269169 | 0,235593  | -2,24155 |
| <b>Ighm</b>                          | Immunoglobulin heavy constant mu                            | 0,032579  | 0,251771  | -2,23493 |
| <b>Zdhhc2</b>                        | zinc finger, DHH domain containing 2                        | 0,0054631 | 0,148673  | -2,23244 |
| <b>Lpl</b>                           | lipoprotein lipase                                          | 0,0051947 | 0,14802   | -2,22897 |
| <b>Slc25a4</b>                       | solute carrier family 25 (mitochondrial carrier), member 4  | 0,0008346 | 0,0864886 | -2,21086 |
| <b>Il1rn</b>                         | interleukin 1 receptor antagonist                           | 0,0012491 | 0,0999478 | -2,20863 |
| <b>Agphd1</b>                        | aminoglycoside phosphotransferase domain containing 1       | 0,0005966 | 0,0849322 | -2,19867 |
| <b>Gas5</b>                          | growth arrest specific 5                                    | 0,0064433 | 0,1551    | -2,19663 |
| <b>Capg</b>                          | capping protein (actin filament), gelsolin-like             | 0,0268211 | 0,235425  | -2,1905  |
| <b>Tnfrsf11b</b>                     | tumor necrosis factor receptor superfamily, member 11b      | 0,0081221 | 0,168173  | -2,14788 |
| <b>Enpp4</b>                         | ectonucleotide pyrophosphatase/phosphodiesterase 4          | 0,035336  | 0,257842  | -2,14471 |
| <b>Clca2</b>                         | chloride channel calcium activated 2                        | 0,0132009 | 0,191132  | -2,13209 |
| <b>Wdpcp</b>                         | WD repeat containing planar cell polarity effector 1        | 0,0433648 | 0,271071  | -2,12933 |
| <b>Sprr1a</b>                        | small proline-rich protein 1A                               | 0,0373561 | 0,260842  | -2,12806 |
| <b>Ypel2</b>                         | yippee-like 2 (Drosophila)                                  | 0,0200238 | 0,216847  | -2,11129 |
| <b>Casp4</b>                         | caspase 4, apoptosis-related cysteine peptidase             | 0,0029054 | 0,125052  | -2,10917 |
| <b>Sord</b>                          | sorbitol dehydrogenase                                      | 0,0445384 | 0,273295  | -2,10452 |
| <b>Vnn1</b>                          | vanin 1                                                     | 0,0039927 | 0,135934  | -2,09395 |
| <b>Adm</b>                           | adrenomedullin                                              | 0,0072424 | 0,160297  | -2,06718 |
| <b>Acer1</b>                         | alkaline ceramidase 1                                       | 0,0017478 | 0,109295  | -2,05852 |
| <b>Arntl2</b>                        | aryl hydrocarbon receptor nuclear translocator-like 2       | 0,0089156 | 0,171117  | -2,00512 |
| <b>Ctgf</b>                          | connective tissue growth factor                             | 0,0120288 | 0,186803  | -1,99434 |
| <b>Zfp811</b>                        | zinc finger protein 811                                     | 0,0094184 | 0,174332  | -1,99385 |
| <b>C87414 /// Gm3259 /// Gm13139</b> | expressed sequence C87414 /// predicted gene                | 0,0159811 | 0,202582  | -1,9918  |

Table S1.

|                                 |                                                   |           |           |          |
|---------------------------------|---------------------------------------------------|-----------|-----------|----------|
| <b>Ddah1</b>                    | dimethylarginine dimethylaminohydrolase 1         | 0,0043416 | 0,139788  | -1,9913  |
| <b>Tmem161a</b>                 | transmembrane protein 161A                        | 0,0005125 | 0,0849322 | -1,9856  |
| <b>Timp1</b>                    | tissue inhibitor of metalloproteinase 1           | 0,0202477 | 0,217253  | -1,98517 |
| <b>Slit2</b>                    | slit homolog 2 (Drosophila)                       | 0,0324094 | 0,251402  | -1,97882 |
| <b>Nfil3</b>                    | nuclear factor, interleukin 3, regulated          | 0,0061549 | 0,153771  | -1,97075 |
| <b>Mpp7</b>                     | membrane protein, palmitoylated 7 (MAGUK          | 0,0081057 | 0,168173  | -1,95869 |
| <b>Igf2</b>                     | insulin-like growth factor 2                      | 0,0304422 | 0,245075  | -1,95552 |
| <b>Cilp</b>                     | cartilage intermediate layer protein, nucleotic   | 0,0404061 | 0,266997  | -1,94734 |
| <b>Rpl17</b>                    | ribosomal protein L17                             | 0,0096804 | 0,176573  | -1,94337 |
| <b>Stom</b>                     | stomatin                                          | 0,0016014 | 0,105804  | -1,94045 |
| <b>Fgf18</b>                    | fibroblast growth factor 18                       | 0,0180361 | 0,210593  | -1,93743 |
| <b>Il22ra1</b>                  | interleukin 22 receptor, alpha 1                  | 0,0002641 | 0,0849322 | -1,92917 |
| <b>Pof1b</b>                    | premature ovarian failure 1B                      | 0,0038757 | 0,134489  | -1,92496 |
| <b>Gmgs</b>                     | GDP-mannose 4, 6-dehydratase                      | 0,0065014 | 0,155617  | -1,92465 |
| <b>S100a4</b>                   | S100 calcium binding protein A4                   | 0,0235356 | 0,228001  | -1,92354 |
| <b>Rnf157</b>                   | ring finger protein 157                           | 0,003595  | 0,131572  | -1,92297 |
| <b>Slc11a2</b>                  | solute carrier family 11 (proton-coupled divalent | 0,0088196 | 0,170577  | -1,92279 |
| <b>Acadl</b>                    | acyl-Coenzyme A dehydrogenase, long-chain         | 0,0003565 | 0,0849322 | -1,91978 |
| <b>Meis2</b>                    | Meis homeobox 2                                   | 0,0216903 | 0,222436  | -1,91591 |
| <b>Grem1</b>                    | gremlin 1                                         | 0,0342675 | 0,255872  | -1,90452 |
| <b>Ptms</b>                     | parathyrosin                                      | 0,0492679 | 0,281592  | -1,90411 |
| <b>Eda2r</b>                    | ectodysplasin A2 receptor                         | 0,0112681 | 0,18408   | -1,90178 |
| <b>Sfrp1</b>                    | secreted frizzled-related protein 1               | 0,0484949 | 0,27988   | -1,90088 |
| <b>Serpinb5</b>                 | serine (or cysteine) peptidase inhibitor, clade   | 0,0126401 | 0,189766  | -1,89961 |
| <b>Gm13242 /// LOC100862458</b> | predicted gene 13242 /// zinc finger protein 1    | 0,0118856 | 0,186347  | -1,89394 |
| <b>Vwcc</b>                     | von Willebrand factor C domain containing 2       | 0,0444824 | 0,273253  | -1,89126 |
| <b>Ccl8 /// LOC100503254</b>    | chemokine (C-C motif) ligand 8 /// c-C motif cl   | 0,0409922 | 0,267381  | -1,87348 |
| <b>Mreg</b>                     | melanoregulin                                     | 0,0357665 | 0,258379  | -1,8653  |
| <b>Arl13b</b>                   | ADP-ribosylation factor-like 13B                  | 0,002599  | 0,122478  | -1,86451 |
| <b>Tmem161a</b>                 | transmembrane protein 161A                        | 0,0103982 | 0,179738  | -1,86367 |
| <b>Slc25a4</b>                  | solute carrier family 25 (mitochondrial carrier   | 0,0005883 | 0,0849322 | -1,86187 |
| <b>Myl7</b>                     | myosin, light polypeptide 7, regulatory           | 0,0015979 | 0,105787  | -1,86118 |
| <b>Atf7ip2</b>                  | activating transcription factor 7 interacting pr  | 0,0281328 | 0,238244  | -1,85654 |
| <b>Mga</b>                      | MAX gene associated                               | 0,001316  | 0,102302  | -1,85214 |
| <b>Car8</b>                     | carbonic anhydrase 8                              | 0,0014558 | 0,104066  | -1,85154 |
| <b>Arntl</b>                    | aryl hydrocarbon receptor nuclear translocat      | 0,0005699 | 0,0849322 | -1,85062 |
| ---                             | ---                                               | 0,0096904 | 0,176658  | -1,84954 |
| <b>B3gnt6</b>                   | UDP-GlcNAc:betaGal beta-1,3-N-acetylglucosa       | 0,0052007 | 0,14802   | -1,84792 |
| <b>Cyp1b1</b>                   | cytochrome P450, family 1, subfamily b, polyp     | 0,0001521 | 0,0831415 | -1,84609 |
| <b>Oxct1</b>                    | 3-oxoacid CoA transferase 1                       | 0,0042169 | 0,138073  | -1,83428 |
| <b>Vnn1</b>                     | vanin 1                                           | 0,0148117 | 0,198344  | -1,83423 |
| <b>Gmgs</b>                     | GDP-mannose 4, 6-dehydratase                      | 0,0049586 | 0,145735  | -1,83156 |
| <b>Slc25a4</b>                  | solute carrier family 25 (mitochondrial carrier   | 0,0024816 | 0,120341  | -1,83082 |
| <b>Oxct1</b>                    | 3-oxoacid CoA transferase 1                       | 0,0035385 | 0,131563  | -1,829   |
| <b>Il1rn</b>                    | interleukin 1 receptor antagonist                 | 0,0072947 | 0,16098   | -1,82635 |
| <b>Car8</b>                     | carbonic anhydrase 8                              | 0,0213233 | 0,221191  | -1,8212  |
| <b>B330016D10Rik</b>            | RIKEN cDNA B330016D10 gene                        | 0,0124373 | 0,189368  | -1,81723 |
| <b>Mpp7</b>                     | membrane protein, palmitoylated 7 (MAGUK          | 0,0281523 | 0,238244  | -1,8139  |
| <b>Khdrbs3</b>                  | KH domain containing, RNA binding, signal tra     | 0,000419  | 0,0849322 | -1,81087 |
| <b>Uap111</b>                   | UDP-N-acteylglucosamine pyrophosphorylase         | 0,0126923 | 0,189766  | -1,80746 |
| <b>Ttr</b>                      | transthyretin                                     | 0,0073166 | 0,161207  | -1,80363 |
| <b>Oxct1</b>                    | 3-oxoacid CoA transferase 1                       | 0,01071   | 0,181488  | -1,79548 |

Table S1.

|                                  |                                                |           |           |          |
|----------------------------------|------------------------------------------------|-----------|-----------|----------|
| <b>Ccdc122</b>                   | coiled-coil domain containing 122              | 0,0073452 | 0,161334  | -1,79408 |
| <b>Ivd</b>                       | isovaleryl coenzyme A dehydrogenase            | 0,0201242 | 0,216849  | -1,7882  |
| <b>Ttr</b>                       | transthyretin                                  | 0,040544  | 0,267148  | -1,7869  |
| <b>Fam115c</b>                   | family with sequence similarity 115, member    | 0,0097996 | 0,176669  | -1,78389 |
| <b>Map3k6</b>                    | mitogen-activated protein kinase kinase kinase | 0,0090948 | 0,17254   | -1,78311 |
| <b>Dner</b>                      | delta/notch-like EGF-related receptor          | 0,0266997 | 0,235425  | -1,7822  |
| <b>Gjb1</b>                      | gap junction protein, beta 1                   | 0,002337  | 0,119793  | -1,77559 |
| <b>Rpap1</b>                     | RNA polymerase II associated protein 1         | 0,0409701 | 0,267335  | -1,77163 |
| <b>2410006H16Rik</b>             | RIKEN cDNA 2410006H16 gene                     | 0,0008247 | 0,0864886 | -1,76949 |
| <b>Sfrp1</b>                     | secreted frizzled-related protein 1            | 0,0074881 | 0,162506  | -1,76876 |
| <b>Fam129c</b>                   | family with sequence similarity 129, member    | 0,0228513 | 0,226196  | -1,76818 |
| <b>7530414M10Rik /// LOC100!</b> | RIKEN cDNA 7530414M10 gene /// uncharacte      | 0,0030307 | 0,125899  | -1,76279 |
| <b>Adamts4</b>                   | a disintegrin-like and metallopeptidase (repro | 0,0359769 | 0,258387  | -1,7616  |
| <b>Nek8</b>                      | NIMA (never in mitosis gene a)-related expres  | 0,0116702 | 0,1854    | -1,7593  |
| <b>Fblim1</b>                    | filamin binding LIM protein 1                  | 0,0052986 | 0,14802   | -1,75495 |
| <b>Rpl13a</b>                    | ribosomal protein L13A                         | 0,0017667 | 0,10964   | -1,75291 |
| <b>Cfhr2</b>                     | complement factor H-related 2                  | 0,0168655 | 0,207129  | -1,7471  |
| <b>Ano3</b>                      | anoctamin 3                                    | 0,0320752 | 0,250786  | -1,74572 |
| <b>Gkn3</b>                      | gastrokine 3                                   | 0,0185167 | 0,21244   | -1,74524 |
| ---                              | ---                                            | 0,0251077 | 0,231021  | -1,74521 |
| <b>Snhg6</b>                     | small nucleolar RNA host gene (non-protein co  | 0,0107934 | 0,182345  | -1,74444 |
| <b>1500012F01Rik</b>             | RIKEN cDNA 1500012F01 gene                     | 0,0008476 | 0,0864886 | -1,74415 |
| <b>Cyp1b1</b>                    | cytochrome P450, family 1, subfamily b, polyp  | 0,0068936 | 0,159107  | -1,74408 |
| <b>Rps25</b>                     | ribosomal protein S25                          | 0,0023375 | 0,119793  | -1,74285 |
| <b>Ddit4</b>                     | DNA-damage-inducible transcript 4              | 0,0020913 | 0,116965  | -1,74262 |
| ---                              | ---                                            | 0,0087799 | 0,170577  | -1,74193 |
| <b>Oxct1</b>                     | 3-oxoacid CoA transferase 1                    | 0,0028317 | 0,124774  | -1,7406  |
| ---                              | ---                                            | 0,0070912 | 0,160168  | -1,7394  |
| <b>D130020L05Rik</b>             | RIKEN cDNA D130020L05 gene                     | 0,017543  | 0,209167  | -1,73873 |
| <b>Ccl28</b>                     | chemokine (C-C motif) ligand 28                | 0,0007304 | 0,0849322 | -1,73856 |
| <b>Hspa8</b>                     | heat shock protein 8                           | 0,0102037 | 0,178809  | -1,73613 |
| <b>Tyro3</b>                     | TYRO3 protein tyrosine kinase 3                | 0,0202644 | 0,217253  | -1,73607 |
| <b>Dleu2</b>                     | deleted in lymphocytic leukemia, 2             | 4,82E-05  | 0,0726097 | -1,73567 |
| <b>Stom</b>                      | stomatin                                       | 0,0038572 | 0,134301  | -1,73352 |
| <b>Ccdc32</b>                    | coiled-coil domain containing 32               | 0,0106205 | 0,181075  | -1,7291  |
| <b>Bok</b>                       | BCL2-related ovarian killer protein            | 0,0013198 | 0,102302  | -1,72747 |
| <b>Dab1</b>                      | disabled 1                                     | 0,0035521 | 0,131563  | -1,72187 |
| <b>Satl1</b>                     | spermidine/spermine N1-acetyl transferase-lil  | 0,0118111 | 0,185922  | -1,72098 |
| <b>Ereg</b>                      | epiregulin                                     | 0,0209726 | 0,220008  | -1,71581 |
| <b>Gm17586</b>                   | predicted gene, 17586                          | 0,0033353 | 0,130662  | -1,71431 |
| <b>Zdhhc2</b>                    | zinc finger, DHHC domain containing 2          | 0,004422  | 0,140705  | -1,71182 |
| <b>BC021614</b>                  | cDNA sequence BC021614                         | 0,0028533 | 0,124893  | -1,71    |
| <b>Stom</b>                      | stomatin                                       | 0,0081257 | 0,168173  | -1,70935 |
| <b>Ttr</b>                       | transthyretin                                  | 0,0125237 | 0,189441  | -1,70788 |
| <b>Zdhhc2</b>                    | zinc finger, DHHC domain containing 2          | 0,0251593 | 0,231021  | -1,70572 |
| <b>4930581F22Rik</b>             | RIKEN cDNA 4930581F22 gene                     | 0,0156484 | 0,201591  | -1,702   |
| <b>Svip</b>                      | small VCP/p97-interacting protein              | 0,0044676 | 0,141005  | -1,70026 |
| <b>Cebpd</b>                     | CCAAT/enhancer binding protein (C/EBP), delt   | 0,0005614 | 0,0849322 | -1,69963 |
| <b>1810011O10Rik</b>             | RIKEN cDNA 1810011O10 gene                     | 0,0302746 | 0,244647  | -1,69928 |
| <b>Sfi1</b>                      | Sfi1 homolog, spindle assembly associated (ye  | 0,032806  | 0,252214  | -1,69617 |
| <b>Senp8</b>                     | SUMO/sentrin specific peptidase 8              | 0,0102344 | 0,178809  | -1,69271 |
| ---                              | ---                                            | 0,0036167 | 0,131572  | -1,69061 |

Table S1.

|                         |                                                  |           |           |          |
|-------------------------|--------------------------------------------------|-----------|-----------|----------|
| <b>1110038B12Rik</b>    | RIKEN cDNA 1110038B12 gene                       | 0,0009279 | 0,0874427 | -1,69015 |
| <b>Mpp7</b>             | membrane protein, palmitoylated 7 (MAGUK         | 0,0100936 | 0,178211  | -1,68989 |
| <b>St5</b>              | suppression of tumorigenicity 5                  | 0,0027075 | 0,123955  | -1,68986 |
| <b>Elovl7</b>           | ELOVL family member 7, elongation of long ch     | 0,0153693 | 0,200277  | -1,68889 |
| <b>Rbm12b</b>           | RNA binding motif protein 12B                    | 0,0158754 | 0,202412  | -1,68808 |
| <b>Stom</b>             | stomatin                                         | 0,006072  | 0,152756  | -1,6859  |
| <b>Rpsud2</b>           | RNA pseudouridylate synthase domain contain      | 0,001911  | 0,114047  | -1,68535 |
| <b>Ccr3</b>             | chemokine (C-C motif) receptor 3                 | 0,0451667 | 0,274885  | -1,68534 |
| <b>Capg</b>             | capping protein (actin filament), gelsolin-like  | 0,0297957 | 0,243554  | -1,68457 |
| <b>Samd4</b>            | sterile alpha motif domain containing 4          | 0,0414283 | 0,268297  | -1,68232 |
| <b>Gtf3c3</b>           | general transcription factor IIIc, polypeptide 3 | 0,0038601 | 0,134301  | -1,68187 |
| <b>Igfbp5</b>           | insulin-like growth factor binding protein 5     | 0,0487197 | 0,280277  | -1,68176 |
| <b>Efha2</b>            | EF-hand domain family, member A2                 | 0,0108566 | 0,18246   | -1,68009 |
| <b>4933403F05Rik</b>    | RIKEN cDNA 4933403F05 gene                       | 0,0168289 | 0,206991  | -1,67941 |
| <b>Ptpn22</b>           | protein tyrosine phosphatase, non-receptor ty    | 0,0070995 | 0,160198  | -1,6792  |
| <b>Vgll3</b>            | vestigial like 3 (Drosophila)                    | 0,0394811 | 0,264976  | -1,6751  |
| <b>Enpp4</b>            | ectonucleotide pyrophosphatase/phosphodie        | 0,0414916 | 0,268297  | -1,67502 |
| <b>Parp3</b>            | poly (ADP-ribose) polymerase family, member      | 0,0005135 | 0,0849322 | -1,67355 |
| <b>Ypel2</b>            | yippee-like 2 (Drosophila)                       | 0,0386091 | 0,263865  | -1,67122 |
| <b>Cep55</b>            | centrosomal protein 55                           | 0,0011521 | 0,0971952 | -1,6694  |
| <b>Pglyrp1</b>          | peptidoglycan recognition protein 1              | 0,0200838 | 0,216849  | -1,66724 |
| ---                     | ---                                              | 0,0224207 | 0,225067  | -1,66714 |
| <b>Parp3</b>            | poly (ADP-ribose) polymerase family, member      | 0,0006339 | 0,0849322 | -1,66637 |
| <b>Lmna</b>             | lamin A                                          | 0,003484  | 0,131563  | -1,66534 |
| ---                     | ---                                              | 0,0485394 | 0,27988   | -1,6651  |
| <b>Stom</b>             | stomatin                                         | 0,0048619 | 0,14496   | -1,66492 |
| <b>Sqrdl</b>            | sulfide quinone reductase-like (yeast)           | 0,0436625 | 0,271676  | -1,65936 |
| <b>Agphd1</b>           | aminoglycoside phosphotransferase domain c       | 0,010757  | 0,181907  | -1,65818 |
| <b>Gas2</b>             | growth arrest specific 2                         | 0,0208893 | 0,219868  | -1,65625 |
| <b>Mob2</b>             | MOB kinase activator 2                           | 0,0129842 | 0,190262  | -1,65451 |
| <b>Bag4</b>             | BCL2-associated athanogene 4                     | 0,002342  | 0,119793  | -1,65357 |
| <b>Smcp</b>             | sperm mitochondria-associated cysteine-rich p    | 0,0092685 | 0,173659  | -1,65277 |
| ---                     | ---                                              | 0,0226742 | 0,225899  | -1,65248 |
| <b>Gm3650 /// Spg11</b> | predicted gene 3650 /// spastic paraplegia 11    | 0,0098223 | 0,176669  | -1,65223 |
| <b>1700040L02Rik</b>    | RIKEN cDNA 1700040L02 gene                       | 0,000733  | 0,0849322 | -1,65195 |
| <b>Efh2</b>             | EF hand domain containing 2                      | 0,0133337 | 0,191798  | -1,65066 |
| <b>Krt222</b>           | keratin 222                                      | 0,024492  | 0,229994  | -1,64913 |
| <b>S100a16</b>          | S100 calcium binding protein A16                 | 0,0005488 | 0,0849322 | -1,64888 |
| <b>Gm3579</b>           | predicted gene 3579                              | 0,0062203 | 0,153771  | -1,64794 |
| <b>Gadd45b</b>          | Growth arrest and DNA-damage-inducible 45        | 0,0416471 | 0,268297  | -1,64641 |
| <b>Arsa</b>             | arylsulfatase A                                  | 0,0310219 | 0,246737  | -1,64611 |
| <b>Thoc1</b>            | THO complex 1                                    | 0,0379534 | 0,262147  | -1,64481 |
| <b>Stxbp6</b>           | syntaxin binding protein 6 (amisyn)              | 0,0062345 | 0,153771  | -1,6444  |
| <b>Nfkbie</b>           | nuclear factor of kappa light polypeptide gene   | 0,0370204 | 0,260249  | -1,63595 |
| <b>Thap2</b>            | THAP domain containing, apoptosis associat       | 0,025993  | 0,233538  | -1,63505 |
| <b>Rtn4</b>             | reticulon 4                                      | 0,0051033 | 0,146905  | -1,6325  |
| <b>Tufm</b>             | Tu translation elongation factor, mitochondria   | 0,0125589 | 0,189455  | -1,63241 |
| <b>Spata5l1</b>         | spermatogenesis associated 5-like 1              | 0,022064  | 0,223823  | -1,63019 |
| <b>Zfp799</b>           | zinc finger protein 799                          | 0,013242  | 0,191394  | -1,6295  |
| <b>4833442J19Rik</b>    | RIKEN cDNA 4833442J19 gene                       | 0,0303702 | 0,244947  | -1,6263  |
| <b>Acot6</b>            | acyl-CoA thioesterase 6                          | 0,0263474 | 0,234624  | -1,62333 |
| <b>Nr1h4</b>            | nuclear receptor subfamily 1, group H, memb      | 0,0065726 | 0,156088  | -1,62071 |



Table S1.

|                                  |                                                     |           |           |          |
|----------------------------------|-----------------------------------------------------|-----------|-----------|----------|
| <b>Gss</b>                       | glutathione synthetase                              | 0,0138368 | 0,194085  | -1,62041 |
| <b>Dnaja4</b>                    | DnaJ (Hsp40) homolog, subfamily A, member           | 0,0085295 | 0,169883  | -1,61994 |
| <b>Ppp4r1l-ps</b>                | protein phosphatase 4, regulatory subunit 1-li      | 0,0074354 | 0,162116  | -1,61882 |
| <b>Cks2 /// Gm12891 /// Gm19</b> | CDC28 protein kinase regulatory subunit 2 ///       | 0,0202713 | 0,217253  | -1,6172  |
| <b>Sult1c2</b>                   | sulfotransferase family, cytosolic, 1C, member      | 0,0028601 | 0,124893  | -1,61673 |
| <b>Pisd-ps1 /// Pisd-ps3</b>     | phosphatidylserine decarboxylase, pseudoger         | 0,0231124 | 0,226903  | -1,61609 |
| <b>Cnot7</b>                     | CCR4-NOT transcription complex, subunit 7           | 0,0212058 | 0,220911  | -1,61532 |
| <b>4831440E17Rik</b>             | RIKEN cDNA 4831440E17 gene                          | 0,0195479 | 0,215725  | -1,61472 |
| <b>4833438C02Rik</b>             | RIKEN cDNA 4833438C02 gene                          | 0,0067381 | 0,157295  | -1,61439 |
| <b>Id4</b>                       | inhibitor of DNA binding 4                          | 0,0004017 | 0,0849322 | -1,61395 |
| <b>Ceacam10</b>                  | carcinoembryonic antigen-related cell adhesio       | 0,0428888 | 0,270312  | -1,61256 |
| <b>D730005E14Rik</b>             | RIKEN cDNA D730005E14 gene                          | 0,0003956 | 0,0849322 | -1,61179 |
| <b>Rerg</b>                      | RAS-like, estrogen-regulated, growth-inhibitor      | 0,0112089 | 0,18408   | -1,61009 |
| <b>Pla2g4c</b>                   | phospholipase A2, group IVC (cytosolic, calci       | 0,0150474 | 0,198997  | -1,60961 |
| <b>Etf1</b>                      | eukaryotic translation termination factor 1         | 0,0223897 | 0,22504   | -1,60923 |
| ---                              | ---                                                 | 0,0168371 | 0,207014  | -1,60799 |
| <b>Baiap2l1</b>                  | BAI1-associated protein 2-like 1                    | 0,0207483 | 0,219228  | -1,60673 |
| <b>Atg9b</b>                     | autophagy related 9B                                | 0,0141816 | 0,195177  | -1,60628 |
| <b>Stard3nl</b>                  | STARD3 N-terminal like                              | 0,0026967 | 0,123955  | -1,60497 |
| <b>A930035D04Rik</b>             | RIKEN cDNA A930035D04 gene                          | 0,0024874 | 0,120341  | -1,60407 |
| <b>Dab1</b>                      | disabled 1                                          | 0,0004699 | 0,0849322 | -1,59956 |
| <b>Neurog3</b>                   | neurogenin 3                                        | 0,0305214 | 0,245142  | -1,59896 |
| <b>Btbd19</b>                    | BTB (POZ) domain containing 19                      | 0,0097532 | 0,176669  | -1,5984  |
| <b>Eif2a</b>                     | eukaryotic translation initiation factor 2A         | 0,0060388 | 0,152626  | -1,59725 |
| <b>Anxa13</b>                    | annexin A13                                         | 0,0237066 | 0,228298  | -1,59707 |
| <b>Clca4</b>                     | chloride channel calcium activated 4                | 0,0033149 | 0,130662  | -1,5968  |
| <b>Snhg12</b>                    | small nucleolar RNA host gene 12                    | 0,0255768 | 0,232165  | -1,59632 |
| ---                              | ---                                                 | 0,0354789 | 0,258176  | -1,59544 |
| <b>Acn9</b>                      | ACN9 homolog ( <i>S. cerevisiae</i> )               | 0,0113072 | 0,18408   | -1,59535 |
| <b>Jmjd7 /// Pla2g4b</b>         | jumonji domain containing 7 /// phospholipas        | 0,0016956 | 0,108097  | -1,59534 |
| <b>6330416G13Rik</b>             | RIKEN cDNA 6330416G13 gene                          | 0,0284113 | 0,238843  | -1,59381 |
| <b>Dio2</b>                      | deiodinase, iodothyronine, type II                  | 0,0080665 | 0,168164  | -1,59213 |
| <b>Pcdhb9</b>                    | protocadherin beta 9                                | 0,0497838 | 0,282091  | -1,59146 |
| <b>1810011O10Rik</b>             | RIKEN cDNA 1810011O10 gene                          | 0,0110471 | 0,183576  | -1,58988 |
| <b>Klhl13</b>                    | kelch-like 13 ( <i>Drosophila</i> )                 | 0,0174819 | 0,209122  | -1,58903 |
| <b>Esr1</b>                      | estrogen receptor 1 (alpha)                         | 0,001256  | 0,0999478 | -1,58867 |
| <b>Aagab</b>                     | alpha- and gamma-adaptin binding protein            | 0,0363013 | 0,258995  | -1,58671 |
| ---                              | ---                                                 | 0,0247836 | 0,230738  | -1,58373 |
| <b>Trmt1</b>                     | TRM1 tRNA methyltransferase 1 homolog ( <i>S. c</i> | 0,0109765 | 0,183113  | -1,58251 |
| <b>Isl1</b>                      | ISL1 transcription factor, LIM/homeodomain          | 0,0378711 | 0,261835  | -1,58162 |
| <b>2500002B13Rik</b>             | RIKEN cDNA 2500002B13 gene                          | 0,0164325 | 0,204812  | -1,58155 |
| <b>Fars2</b>                     | phenylalanine-tRNA synthetase 2 (mitochondr         | 0,0459594 | 0,275912  | -1,58126 |
| <b>Ppp1r14d</b>                  | protein phosphatase 1, regulatory (inhibitor) s     | 0,0083701 | 0,169445  | -1,58106 |
| <b>Lmna</b>                      | lamin A                                             | 0,0073783 | 0,161409  | -1,57965 |
| <b>Gm15848</b>                   | predicted gene 15848                                | 0,0057658 | 0,150585  | -1,57895 |
| <b>Zmym1</b>                     | zinc finger, MYM domain containing 1                | 0,0160976 | 0,203169  | -1,57788 |
| <b>5730559C18Rik</b>             | RIKEN cDNA 5730559C18 gene                          | 0,0368366 | 0,259922  | -1,5773  |
| <b>S100a16</b>                   | S100 calcium binding protein A16                    | 0,0030251 | 0,125899  | -1,57632 |
| <b>Arsj</b>                      | arylsulfatase J                                     | 0,018882  | 0,213232  | -1,57471 |
| <b>Prodh2</b>                    | proline dehydrogenase (oxidase) 2                   | 7,62E-05  | 0,0732731 | -1,57468 |
| <b>Igf1</b>                      | insulin-like growth factor 1                        | 0,0398768 | 0,265913  | -1,57296 |
| <b>Slc25a12</b>                  | solute carrier family 25 (mitochondrial carrier     | 0,0004933 | 0,0849322 | -1,57253 |

Table S1.

|                                  |                                                  |           |           |          |
|----------------------------------|--------------------------------------------------|-----------|-----------|----------|
| ---                              | ---                                              | 0,0114738 | 0,185214  | -1,57139 |
| <b>Nup54</b>                     | nucleoporin 54                                   | 0,0197476 | 0,216218  | -1,57138 |
| <b>Prss23</b>                    | protease, serine, 23                             | 0,0336811 | 0,25456   | -1,57138 |
| <b>A430033K04Rik</b>             | RIKEN cDNA A430033K04 gene                       | 0,002906  | 0,125052  | -1,57124 |
| <b>Cks2 /// Gm12891 /// Gm19</b> | CDC28 protein kinase regulatory subunit 2 ///    | 0,0007736 | 0,0864886 | -1,57049 |
| <b>Rras</b>                      | Harvey rat sarcoma oncogene, subgroup R          | 0,0156508 | 0,201591  | -1,56993 |
| <b>Bet1</b>                      | blocked early in transport 1 homolog (S. cerev   | 0,0021004 | 0,116965  | -1,56956 |
| <b>Guca1a</b>                    | guanylate cyclase activator 1a (retina)          | 0,0134591 | 0,192379  | -1,56939 |
| <b>Slc11a2</b>                   | solute carrier family 11 (proton-coupled divale  | 0,0445395 | 0,273295  | -1,56923 |
| <b>Nap111</b>                    | nucleosome assembly protein 1-like 1             | 0,0114651 | 0,185214  | -1,56892 |
| <b>Atf7ip2</b>                   | activating transcription factor 7 interacting pr | 0,0003849 | 0,0849322 | -1,56852 |
| <b>Guk1</b>                      | guanylate kinase 1                               | 0,0048298 | 0,14496   | -1,56716 |
| <b>Tufm</b>                      | Tu translation elongation factor, mitochondria   | 0,013078  | 0,19038   | -1,56589 |
| <b>Tec</b>                       | tec protein tyrosine kinase                      | 0,0009501 | 0,0874427 | -1,5655  |
| <b>Apobec3</b>                   | apolipoprotein B mRNA editing enzyme, catal      | 0,0027206 | 0,124091  | -1,56412 |
| <b>Sulf1</b>                     | sulfatase 1                                      | 0,010215  | 0,178809  | -1,56322 |
| <b>Pnp /// Pnp2</b>              | purine-nucleoside phosphorylase /// purine-n     | 0,0300548 | 0,243988  | -1,56311 |
| <b>Tmem2</b>                     | transmembrane protein 2                          | 0,0070708 | 0,160034  | -1,56244 |
| <b>Gsn</b>                       | gelsolin                                         | 0,0016485 | 0,107182  | -1,56194 |
| <b>Slc5a3</b>                    | solute carrier family 5 (inositol transporters), | 0,0018331 | 0,112105  | -1,56171 |
| <b>Pisd /// Pisd-ps3</b>         | phosphatidylserine decarboxylase /// phosph      | 0,0029412 | 0,125632  | -1,56099 |
| ---                              | ---                                              | 0,0071929 | 0,160198  | -1,56036 |
| <b>C430048L16Rik</b>             | RIKEN cDNA C430048L16 gene                       | 0,0086715 | 0,170433  | -1,56033 |
| <b>Nap111</b>                    | nucleosome assembly protein 1-like 1             | 0,0035769 | 0,131572  | -1,55776 |
| <b>Sh2d4a</b>                    | SH2 domain containing 4A                         | 0,0170219 | 0,207725  | -1,55717 |
| <b>Dclk1</b>                     | doublecortin-like kinase 1                       | 0,0037352 | 0,132928  | -1,55639 |
| <b>Cyp27a1</b>                   | cytochrome P450, family 27, subfamily a, poly    | 0,0481622 | 0,279615  | -1,55546 |
| <b>Etv5</b>                      | ets variant gene 5                               | 0,0044705 | 0,141005  | -1,5551  |
| <b>Serhl</b>                     | serine hydrolase-like                            | 0,0179935 | 0,21057   | -1,55397 |
| <b>Gm3417 /// Gm3448 /// Tct</b> | predicted gene 3417 /// predicted gene 3448      | 0,0490523 | 0,28108   | -1,55326 |
| ---                              | ---                                              | 0,0009518 | 0,0874427 | -1,5529  |
| <b>Fcamr</b>                     | Fc receptor, IgA, IgM, high affinity             | 0,0369961 | 0,260249  | -1,55233 |
| <b>Habp4</b>                     | hyaluronic acid binding protein 4                | 0,0009427 | 0,0874427 | -1,55115 |
| ---                              | ---                                              | 0,0030053 | 0,125847  | -1,54977 |
| <b>Senp6</b>                     | SUMO/sentrin specific peptidase 6                | 0,0028899 | 0,125052  | -1,54729 |
| ---                              | ---                                              | 0,0030334 | 0,125899  | -1,54726 |
| <b>Gm4285</b>                    | predicted gene 4285                              | 0,0003372 | 0,0849322 | -1,54696 |
| <b>Kif20b</b>                    | kinesin family member 20B                        | 0,0345129 | 0,256475  | -1,54622 |
| <b>Slc35b2</b>                   | solute carrier family 35, member B2              | 0,0334909 | 0,253664  | -1,54619 |
| <b>2810442I21Rik</b>             | RIKEN cDNA 2810442I21 gene                       | 0,0111453 | 0,183909  | -1,54494 |
| <b>Eif4b</b>                     | eukaryotic translation initiation factor 4B      | 0,007046  | 0,159985  | -1,54459 |
| <b>Pisd /// Pisd-ps3</b>         | phosphatidylserine decarboxylase /// phosph      | 0,0046916 | 0,144067  | -1,5425  |
| <b>Tmx2</b>                      | thioredoxin-related transmembrane protein 2      | 0,0295813 | 0,242925  | -1,54087 |
| <b>Gp2</b>                       | glycoprotein 2 (zymogen granule membrane)        | 0,0175009 | 0,209122  | -1,5407  |
| <b>Col12a1</b>                   | collagen, type XII, alpha 1                      | 0,0132918 | 0,191689  | -1,53915 |
| <b>Coro7</b>                     | coronin 7                                        | 0,0055942 | 0,149218  | -1,53878 |
| <b>1810049H13Rik</b>             | RIKEN cDNA 1810049H13 gene                       | 0,0269799 | 0,235813  | -1,53869 |
| <b>Isx</b>                       | intestine specific homeobox                      | 0,0179654 | 0,210369  | -1,53852 |
| <b>Uba3</b>                      | ubiquitin-like modifier activating enzyme 3      | 0,0481941 | 0,279615  | -1,53812 |
| <b>A330033J07Rik</b>             | RIKEN cDNA A330033J07 gene                       | 0,0043065 | 0,139213  | -1,53798 |
| ---                              | ---                                              | 0,0468477 | 0,277263  | -1,53681 |
| <b>Vps18</b>                     | vacuolar protein sorting 18 (yeast)              | 0,0012318 | 0,0998479 | -1,53572 |

Table S1.

|                                     |                                                          |           |           |          |
|-------------------------------------|----------------------------------------------------------|-----------|-----------|----------|
| <b>Ccm2</b>                         | cerebral cavernous malformation 2                        | 0,0130099 | 0,190262  | -1,53554 |
| <b>Fabp6</b>                        | fatty acid binding protein 6, ileal (gastrotropin        | 0,0430277 | 0,270442  | -1,53286 |
| <b>Mast4</b>                        | microtubule associated serine/threonine kina             | 0,0277742 | 0,237798  | -1,53077 |
| <b>Cd300lb</b>                      | CD300 antigen like family member B                       | 0,0408557 | 0,267335  | -1,53074 |
| <b>Hnrnpa1</b>                      | heterogeneous nuclear ribonucleoprotein A1               | 0,016048  | 0,20288   | -1,52903 |
| <b>Ubxn1</b>                        | UBX domain protein 1                                     | 0,0018342 | 0,112105  | -1,52873 |
| <b>Vmp1</b>                         | vacuole membrane protein 1                               | 0,0135224 | 0,19287   | -1,52849 |
| <b>Cln8</b>                         | ceroid-lipofuscinosis, neuronal 8                        | 0,0065241 | 0,155858  | -1,52564 |
| <b>Cd2ap</b>                        | CD2-associated protein                                   | 0,0007178 | 0,0849322 | -1,52506 |
| <b>Cox7a2l</b>                      | cytochrome c oxidase subunit VIIa polypeptid             | 0,0061296 | 0,153771  | -1,52477 |
| <b>Pebp1</b>                        | phosphatidylethanolamine binding protein 1               | 0,0001537 | 0,0831415 | -1,52475 |
| <b>1700049G17Rik</b>                | RIKEN cDNA 1700049G17 gene                               | 0,0115006 | 0,185214  | -1,52466 |
| <b>Gsn</b>                          | gelsolin                                                 | 0,0389818 | 0,264304  | -1,52463 |
| <b>Ky</b>                           | kyphoscoliosis peptidase                                 | 0,0175765 | 0,209395  | -1,52331 |
| <b>Ret</b>                          | ret proto-oncogene                                       | 0,0023735 | 0,119793  | -1,5228  |
| <b>Lonrf3</b>                       | LON peptidase N-terminal domain and ring fir             | 0,0146379 | 0,197577  | -1,51982 |
| <b>A730091E23Rik</b>                | RIKEN cDNA A730091E23 gene                               | 0,0142582 | 0,19552   | -1,51957 |
| <b>Btbd19</b>                       | BTB (POZ) domain containing 19                           | 0,0427096 | 0,270271  | -1,51922 |
| <b>A230107N01Rik</b>                | RIKEN cDNA A230107N01 gene                               | 0,0049345 | 0,145521  | -1,51768 |
| <b>Eif2a</b>                        | eukaryotic translation initiation factor 2A              | 0,0394534 | 0,264936  | -1,51768 |
| <b>Vcan</b>                         | versican                                                 | 0,0162238 | 0,203684  | -1,51652 |
| <b>Nmnat1</b>                       | nicotinamide nucleotide adenylyltransferase 1            | 0,0009494 | 0,0874427 | -1,51538 |
| <b>Pigz</b>                         | phosphatidylinositol glycan anchor biosynthes            | 0,0025806 | 0,122149  | -1,5147  |
| ---                                 | ---                                                      | 0,0110963 | 0,183584  | -1,51392 |
| <b>7530414M10Rik</b>                | RIKEN cDNA 7530414M10 gene                               | 0,035862  | 0,258383  | -1,51391 |
| <b>Gsn</b>                          | gelsolin                                                 | 0,0301852 | 0,244168  | -1,51317 |
| <b>Lamtor2</b>                      | late endosomal/lysosomal adaptor, MAPK anc               | 0,0137853 | 0,19383   | -1,51307 |
| <b>4930473A06Rik</b>                | RIKEN cDNA 4930473A06 gene                               | 0,0035093 | 0,131563  | -1,51221 |
| <b>Snhg1</b>                        | small nucleolar RNA host gene (non-protein c             | 0,0234746 | 0,227891  | -1,51189 |
| <b>1700034H14Rik</b>                | RIKEN cDNA 1700034H14 gene                               | 0,0267846 | 0,235425  | -1,51143 |
| <b>Tstd1</b>                        | thiosulfate sulfurtransferase (rhodanese)-like           | 0,0027137 | 0,123955  | -1,51138 |
| <b>Mfap1a /// Mfap1b</b>            | microfibrillar-associated protein 1A /// microf          | 0,0256519 | 0,232457  | -1,51127 |
| <b>1810019D21Rik</b>                | RIKEN cDNA 1810019D21 gene                               | 0,0171047 | 0,208346  | -1,51101 |
| <b>Cfh</b>                          | complement component factor h                            | 0,0317664 | 0,250101  | -1,51066 |
| <b>Atp6v1g2</b>                     | ATPase, H <sup>+</sup> transporting, lysosomal V1 subuni | 0,0259945 | 0,233538  | -1,51011 |
| <b>Cisd1</b>                        | CDGSH iron sulfur domain 1                               | 0,0130249 | 0,190262  | -1,50997 |
| <b>Srrm1</b>                        | Serine/arginine repetitive matrix 1                      | 0,0097351 | 0,176669  | -1,50978 |
| <b>6030458C11Rik</b>                | RIKEN cDNA 6030458C11 gene                               | 0,0001089 | 0,0805578 | -1,50853 |
| <b>Snx5</b>                         | sorting nexin 5                                          | 0,0034133 | 0,131563  | -1,50634 |
| <b>Smpd4</b>                        | sphingomyelin phosphodiesterase 4                        | 0,03862   | 0,263865  | -1,50624 |
| <b>Cebpd</b>                        | CCAAT/enhancer binding protein (C/EBP), delt             | 0,0012517 | 0,0999478 | -1,50601 |
| <b>Galnt16</b>                      | UDP-N-acetyl-alpha-D-galactosamine:polypep               | 0,0423846 | 0,270107  | -1,506   |
| <b>Snx5</b>                         | sorting nexin 5                                          | 0,0027935 | 0,124286  | -1,50368 |
| <b>6330578E17Rik</b>                | RIKEN cDNA 6330578E17 gene                               | 0,001675  | 0,107956  | -1,50366 |
| <b>Syk</b>                          | spleen tyrosine kinase                                   | 0,0021135 | 0,116965  | -1,50357 |
| <b>Mctp2</b>                        | multiple C2 domains, transmembrane 2                     | 0,0020953 | 0,116965  | -1,50309 |
| <b>Thpo</b>                         | thrombopoietin                                           | 0,0453047 | 0,275246  | -1,503   |
| <b>Pde5a</b>                        | phosphodiesterase 5A, cGMP-specific                      | 0,0339761 | 0,255161  | -1,5014  |
| <b>Nfkbil1</b>                      | nuclear factor of kappa light polypeptide gene           | 0,0095284 | 0,17517   | -1,50093 |
| <b>Gm3650 /// Spg11</b>             | predicted gene 3650 /// spastic paraplegia 11            | 0,0101732 | 0,178783  | -1,50062 |
| <b>Gigyf2</b>                       | GRB10 interacting GYF protein 2                          | 0,0286671 | 0,239623  | -1,50028 |
| <b>Dynlt1a /// Dynlt1b /// Dynl</b> | dynein light chain Tctex-type 1A /// dynein lig          | 0,0017397 | 0,109277  | -1,50024 |

Table S1.

|                                |                                                                      |           |           |         |
|--------------------------------|----------------------------------------------------------------------|-----------|-----------|---------|
| <b>D8Ertd317e</b>              | DNA segment, Chr 8, ERATO Doi 317, expressed                         | 0,0222443 | 0,224606  | 1,50012 |
| <b>Abca3</b>                   | ATP-binding cassette, sub-family A (ABC1), member 3                  | 0,0389731 | 0,264304  | 1,50063 |
| <b>Ddx58</b>                   | DEAD (Asp-Glu-Ala-Asp) box polypeptide 58                            | 0,0101331 | 0,178366  | 1,50163 |
| <b>Slc19a1</b>                 | solute carrier family 19 (folate transporter), member 1              | 0,0063784 | 0,154636  | 1,50196 |
| <b>Slc39a11</b>                | solute carrier family 39 (metal ion transporter), member 11          | 0,025387  | 0,231723  | 1,50272 |
| <b>Il12rb2</b>                 | interleukin 12 receptor, beta 2                                      | 0,0097363 | 0,176669  | 1,50278 |
| <b>Agfg1</b>                   | ArfGAP with FG repeats 1                                             | 0,0035656 | 0,131572  | 1,50363 |
| <b>Aldh4a1</b>                 | aldehyde dehydrogenase 4 family, member A1                           | 0,0170683 | 0,20809   | 1,50373 |
| <b>Ces2c /// Ces2d-ps</b>      | carboxylesterase 2C /// carboxylesterase 2D, isoform 2               | 0,0236395 | 0,228264  | 1,50378 |
| ---                            | ---                                                                  | 0,0180837 | 0,210818  | 1,50382 |
| <b>Acsl6</b>                   | acyl-CoA synthetase long-chain family member 6                       | 0,0372362 | 0,260438  | 1,50448 |
| <b>Fam13b</b>                  | family with sequence similarity 13, member B                         | 0,0405002 | 0,267106  | 1,50517 |
| <b>Fgl2</b>                    | fibrinogen-like protein 2                                            | 0,0184453 | 0,212189  | 1,50537 |
| <b>Slc35e3</b>                 | solute carrier family 35, member E3                                  | 0,0179464 | 0,210297  | 1,50571 |
| <b>Entpd7</b>                  | ectonucleoside triphosphate diphosphohydrolase 7                     | 0,0020051 | 0,115014  | 1,50597 |
| <b>Syp12</b>                   | synaptophysin-like 2                                                 | 0,0290929 | 0,240788  | 1,50601 |
| <b>Cc2d2a</b>                  | coiled-coil and C2 domain containing 2A                              | 0,0244268 | 0,229994  | 1,50626 |
| <b>Aim1</b>                    | absent in melanoma 1-like                                            | 0,0011013 | 0,0951068 | 1,50672 |
| <b>Tmem236</b>                 | transmembrane protein 236                                            | 0,0084704 | 0,169849  | 1,50733 |
| <b>Ergic2</b>                  | ERGIC and golgi 2                                                    | 0,002527  | 0,121181  | 1,50783 |
| ---                            | ---                                                                  | 0,0021603 | 0,117467  | 1,50816 |
| <b>Osbpl6</b>                  | Oxysterol binding protein-like 6                                     | 0,0015258 | 0,104066  | 1,50932 |
| <b>Slc22a4</b>                 | solute carrier family 22 (organic cation transporter), member 4      | 0,0086356 | 0,170303  | 1,50947 |
| <b>Soat2</b>                   | sterol O-acyltransferase 2                                           | 0,014409  | 0,196517  | 1,51166 |
| <b>Ddx11</b>                   | DEAD/H (Asp-Glu-Ala-Asp/His) box polypeptide 11                      | 0,0424811 | 0,270264  | 1,51207 |
| <b>Ccnj</b>                    | cyclin J                                                             | 0,02745   | 0,236926  | 1,51288 |
| <b>Picalm</b>                  | phosphatidylinositol binding clathrin assembly protein               | 0,002428  | 0,120058  | 1,51306 |
| <b>Tgm2</b>                    | transglutaminase 2, C polypeptide                                    | 0,0386315 | 0,263865  | 1,51331 |
| <b>Tbx3</b>                    | T-box 3                                                              | 0,0205539 | 0,218323  | 1,51347 |
| <b>Entpd4 /// LOC100862375</b> | ectonucleoside triphosphate diphosphohydrolase 4                     | 0,0087212 | 0,170474  | 1,51406 |
| <b>Sc4mol</b>                  | sterol-C4-methyl oxidase-like                                        | 0,0065092 | 0,155617  | 1,51464 |
| <b>Gfi1</b>                    | growth factor independent 1                                          | 0,0436915 | 0,271676  | 1,51466 |
| <b>Zfp948</b>                  | Zinc finger protein 948                                              | 0,0299799 | 0,243601  | 1,51485 |
| <b>Tspan6</b>                  | tetraspanin 6                                                        | 0,0013458 | 0,102833  | 1,51671 |
| <b>Slc19a1</b>                 | solute carrier family 19 (folate transporter), member 1              | 0,00707   | 0,160034  | 1,51725 |
| <b>Pcm1</b>                    | pericentriolar material 1                                            | 0,0387676 | 0,264034  | 1,51758 |
| <b>Ppard</b>                   | peroxisome proliferator activator receptor delta                     | 0,0077349 | 0,165124  | 1,51764 |
| ---                            | ---                                                                  | 0,006503  | 0,155617  | 1,51861 |
| <b>Nampt</b>                   | nicotinamide phosphoribosyltransferase                               | 0,0246746 | 0,230449  | 1,51891 |
| <b>AI413194 /// Trim56</b>     | expressed sequence AI413194 /// tripartite motif 56                  | 0,0084575 | 0,169799  | 1,51919 |
| ---                            | ---                                                                  | 0,0023619 | 0,119793  | 1,51925 |
| <b>Cycc</b>                    | cytochrome c, somatic                                                | 0,0088868 | 0,171066  | 1,51949 |
| <b>Slc16a5</b>                 | solute carrier family 16 (monocarboxylic acid transporter), member 5 | 0,0090337 | 0,171976  | 1,51951 |
| <b>Hamp2</b>                   | hepcidin antimicrobial peptide 2                                     | 0,0057923 | 0,150585  | 1,51959 |
| <b>Entpd4 /// LOC100862375</b> | ectonucleoside triphosphate diphosphohydrolase 4                     | 0,0008875 | 0,0864886 | 1,52086 |
| <b>Il33</b>                    | interleukin 33                                                       | 0,0372135 | 0,260435  | 1,52095 |
| <b>Tmem65</b>                  | transmembrane protein 65                                             | 0,0001285 | 0,0805578 | 1,52191 |
| ---                            | ---                                                                  | 0,0085993 | 0,170243  | 1,52246 |
| <b>Xylb</b>                    | xylulokinase homolog (H. influenzae)                                 | 0,0077837 | 0,165518  | 1,52272 |
| <b>Defa-rs1</b>                | defensin, alpha, related sequence 1                                  | 0,0145436 | 0,197393  | 1,52296 |
| <b>Slc6a7</b>                  | solute carrier family 6 (neurotransmitter transporter), member 7     | 0,0390759 | 0,264387  | 1,52431 |
| <b>Rab37</b>                   | RAB37, member of RAS oncogene family                                 | 0,0191346 | 0,214603  | 1,52481 |

Table S1.

|                                    |                                                  |           |           |         |
|------------------------------------|--------------------------------------------------|-----------|-----------|---------|
| <b>Gls</b>                         | glutaminase                                      | 0,0012839 | 0,101183  | 1,52486 |
| <b>H2-T10 /// H2-T22 /// H2-T9</b> | histocompatibility 2, T region locus 10 /// hist | 0,0268093 | 0,235425  | 1,52502 |
| <b>Pnpo</b>                        | pyridoxine 5'-phosphate oxidase                  | 0,0037329 | 0,132928  | 1,52586 |
| <b>Pcp4l1</b>                      | Purkinje cell protein 4-like 1                   | 0,0242772 | 0,229728  | 1,52656 |
| ---                                | ---                                              | 0,0032501 | 0,130026  | 1,52714 |
| <b>Iapp</b>                        | islet amyloid polypeptide                        | 0,0185028 | 0,21244   | 1,52737 |
| <b>Zfp92</b>                       | zinc finger protein 92                           | 0,0291277 | 0,240788  | 1,52737 |
| <b>Als2</b>                        | amyotrophic lateral sclerosis 2 (juvenile)       | 0,0021841 | 0,117875  | 1,52762 |
| <b>Cyp2d22</b>                     | cytochrome P450, family 2, subfamily d, polyp    | 0,0006601 | 0,0849322 | 1,52765 |
| <b>Bnip3</b>                       | BCL2/adenovirus E1B interacting protein 3        | 0,0063167 | 0,154285  | 1,52817 |
| <b>Dpp4</b>                        | dipeptidylpeptidase 4                            | 0,0053286 | 0,14802   | 1,52942 |
| <b>Tgm2</b>                        | transglutaminase 2, C polypeptide                | 0,0361874 | 0,258771  | 1,52995 |
| <b>Pcgf5</b>                       | polycomb group ring finger 5                     | 0,009451  | 0,174632  | 1,53049 |
| <b>Gclm</b>                        | glutamate-cysteine ligase, modifier subunit      | 0,0037996 | 0,133272  | 1,53078 |
| <b>Sdccag8</b>                     | serologically defined colon cancer antigen 8     | 0,0052307 | 0,14802   | 1,53216 |
| ---                                | ---                                              | 0,0195901 | 0,215794  | 1,53227 |
| ---                                | ---                                              | 0,0118697 | 0,186339  | 1,53319 |
| <b>A930026I22Rik</b>               | RIKEN cDNA A930026I22 gene                       | 0,0032655 | 0,130401  | 1,53331 |
| <b>Siglec5</b>                     | sialic acid binding Ig-like lectin 5             | 0,0304078 | 0,245075  | 1,53376 |
| <b>Abhd16a</b>                     | abhydrolase domain containing 16A                | 0,0024281 | 0,120058  | 1,53445 |
| <b>Sc5d</b>                        | sterol-C5-desaturase (fungal ERG3, delta-5-de    | 0,0019852 | 0,114711  | 1,53484 |
| <b>H2-Aa</b>                       | histocompatibility 2, class II antigen A, alpha  | 0,0497328 | 0,282091  | 1,53602 |
| <b>Plekhhb1</b>                    | pleckstrin homology domain containing, famil     | 0,0055996 | 0,149218  | 1,53862 |
| <b>Cldn15</b>                      | claudin 15                                       | 0,002768  | 0,124286  | 1,53936 |
| <b>Lce1i</b>                       | late cornified envelope 1l                       | 0,023568  | 0,228041  | 1,53941 |
| ---                                | ---                                              | 0,0344227 | 0,256247  | 1,53956 |
| <b>Ppargc1a</b>                    | peroxisome proliferative activated receptor, g   | 0,0024587 | 0,120058  | 1,53985 |
| ---                                | ---                                              | 0,0002257 | 0,0849322 | 1,54061 |
| <b>Ankrd12</b>                     | ankyrin repeat domain 12                         | 0,0030247 | 0,125899  | 1,54123 |
| <b>Vipr1</b>                       | vasoactive intestinal peptide receptor 1         | 0,0171883 | 0,208575  | 1,5418  |
| <b>AY761184</b>                    | cDNA sequence AY761184                           | 0,0112418 | 0,18408   | 1,54207 |
| <b>Tmem206</b>                     | transmembrane protein 206                        | 0,0207795 | 0,219436  | 1,54228 |
| <b>Sema3b</b>                      | sema domain, immunoglobulin domain (Ig), st      | 0,0150634 | 0,198997  | 1,54282 |
| <b>Hipk2</b>                       | homeodomain interacting protein kinase 2         | 0,0002913 | 0,0849322 | 1,5434  |
| <b>Mtch2</b>                       | mitochondrial carrier homolog 2 (C. elegans)     | 0,0241457 | 0,229226  | 1,54425 |
| <b>Cdc14a</b>                      | CDC14 cell division cycle 14A                    | 0,0227843 | 0,225899  | 1,54467 |
| <b>Naaladl1</b>                    | N-acetylated alpha-linked acidic dipeptidase-l   | 0,0201367 | 0,216849  | 1,5448  |
| <b>Yes1</b>                        | Yamaguchi sarcoma viral (v-yes) oncogene ho      | 0,0165479 | 0,205389  | 1,54714 |
| <b>Epha1</b>                       | Eph receptor A1                                  | 0,0087028 | 0,170474  | 1,54779 |
| <b>Apol11b</b>                     | apolipoprotein L 11b                             | 0,0151097 | 0,199098  | 1,54982 |
| <b>Prm1</b>                        | protamine 1                                      | 0,0260503 | 0,233674  | 1,55051 |
| <b>Hipk2</b>                       | homeodomain interacting protein kinase 2         | 0,0377939 | 0,261598  | 1,55131 |
| <b>Wee1</b>                        | WEE 1 homolog 1 (S. pombe)                       | 0,0351425 | 0,257842  | 1,55142 |
| <b>Mep1b</b>                       | mepirin 1 beta                                   | 0,0008053 | 0,0864886 | 1,55146 |
| <b>Atl2</b>                        | atlastin GTPase 2                                | 0,005331  | 0,14802   | 1,55553 |
| <b>Zyx</b>                         | zyxin                                            | 0,0052447 | 0,14802   | 1,55564 |
| <b>Vamp2</b>                       | vesicle-associated membrane protein 2            | 0,006666  | 0,156618  | 1,55604 |
| <b>Srd5a3</b>                      | steroid 5 alpha-reductase 3                      | 0,0242747 | 0,229728  | 1,55767 |
| <b>Slc5a9</b>                      | solute carrier family 5 (sodium/glucose cotran   | 0,0004714 | 0,0849322 | 1,55882 |
| <b>Gpr151</b>                      | G protein-coupled receptor 151                   | 0,0404354 | 0,267051  | 1,56009 |
| <b>2900006B11Rik</b>               | RIKEN cDNA 2900006B11 gene                       | 0,0073895 | 0,161438  | 1,56205 |
| ---                                | ---                                              | 0,0264582 | 0,235012  | 1,56251 |

Table S1.

|                  |                                                 |           |           |         |
|------------------|-------------------------------------------------|-----------|-----------|---------|
| <b>Cpm</b>       | carboxypeptidase M                              | 0,013529  | 0,192879  | 1,56344 |
| <b>Abcb1a</b>    | ATP-binding cassette, sub-family B (MDR/TAP     | 0,0058443 | 0,150903  | 1,56457 |
| <b>AW112010</b>  | expressed sequence AW112010                     | 0,0120153 | 0,186803  | 1,56547 |
| <b>Vps37a</b>    | vacuolar protein sorting 37A (yeast)            | 0,0084357 | 0,16957   | 1,56589 |
| <b>Trim30d</b>   | tripartite motif-containing 30D                 | 0,0424954 | 0,270264  | 1,56615 |
| <b>Gbp7</b>      | guanylate binding protein 7                     | 0,0475017 | 0,278552  | 1,56694 |
| <b>Smpx</b>      | small muscle protein, X-linked                  | 0,0162906 | 0,204078  | 1,56705 |
| <b>Gramd3</b>    | GRAM domain containing 3                        | 0,0049037 | 0,14496   | 1,56887 |
| <b>Osbpl6</b>    | oxysterol binding protein-like 6                | 0,0004612 | 0,0849322 | 1,56908 |
| <b>Ttc39c</b>    | tetratricopeptide repeat domain 39C             | 0,0011745 | 0,097786  | 1,5691  |
| <b>Per3</b>      | period homolog 3 (Drosophila)                   | 0,0187062 | 0,213166  | 1,5705  |
| <b>Evl</b>       | Ena-vasodilator stimulated phosphoprotein       | 0,0366739 | 0,259502  | 1,57069 |
| <b>Tmem117</b>   | transmembrane protein 117                       | 0,0142094 | 0,195178  | 1,57077 |
| <b>Rgs2</b>      | regulator of G-protein signaling 2              | 0,0001784 | 0,0831415 | 1,57156 |
| <b>AI849538</b>  | expressed sequence AI849538                     | 0,0413233 | 0,268297  | 1,57246 |
| <b>Rnd2</b>      | Rho family GTPase 2                             | 0,0122279 | 0,187704  | 1,57273 |
| <b>Paqr7</b>     | progesterin and adipoQ receptor family membe    | 0,0317946 | 0,250162  | 1,57281 |
| <b>Lrrtm1</b>    | leucine rich repeat transmembrane neuronal      | 0,0071587 | 0,160198  | 1,57282 |
| <b>Sh2d6</b>     | SH2 domain containing 6                         | 0,0169187 | 0,20732   | 1,57284 |
| <b>Adh6a</b>     | alcohol dehydrogenase 6A (class V)              | 0,0036719 | 0,132256  | 1,57309 |
| <b>Nelf</b>      | nasal embryonic LHRH factor                     | 0,0393862 | 0,264919  | 1,57317 |
| <b>Tsku</b>      | tsukushi                                        | 0,0212625 | 0,220911  | 1,57421 |
| <b>Dgcr6</b>     | DiGeorge syndrome critical region gene 6        | 0,0033509 | 0,130776  | 1,57445 |
| <b>Rabgap1l</b>  | RAB GTPase activating protein 1-like            | 0,0126415 | 0,189766  | 1,57454 |
| <b>Slc5a12</b>   | solute carrier family 5 (sodium/glucose cotran  | 0,0198374 | 0,216477  | 1,57461 |
| <b>Ankrd12</b>   | ankyrin repeat domain 12                        | 0,0098005 | 0,176669  | 1,57486 |
| <b>Tmc7</b>      | transmembrane channel-like gene family 7        | 0,0143257 | 0,195852  | 1,57536 |
| <b>Zc3h15</b>    | zinc finger CCCH-type containing 15             | 0,0153539 | 0,200277  | 1,57803 |
| <b>Apol11b</b>   | apolipoprotein L 11b                            | 0,0035073 | 0,131563  | 1,57926 |
| <b>Gramd3</b>    | GRAM domain containing 3                        | 0,0005361 | 0,0849322 | 1,57975 |
| <b>Gas2l3</b>    | growth arrest-specific 2 like 3                 | 0,046066  | 0,276084  | 1,58039 |
| <b>Gm15527</b>   | Predicted gene 15527                            | 0,0425171 | 0,270264  | 1,58064 |
| <b>Abhd2</b>     | abhydrolase domain containing 2                 | 0,011691  | 0,185429  | 1,58083 |
| <b>Vwce</b>      | von Willebrand factor C and EGF domains         | 0,011613  | 0,1854    | 1,58098 |
| <b>Ccbe1</b>     | collagen and calcium binding EGF domains 1      | 0,0181826 | 0,211172  | 1,58128 |
| <b>Gstm3</b>     | glutathione S-transferase, mu 3                 | 0,0356964 | 0,258379  | 1,58148 |
| <b>Zfp40</b>     | Zinc finger protein 40                          | 0,0324174 | 0,251402  | 1,58289 |
| <b>Il18</b>      | interleukin 18                                  | 0,0171379 | 0,208575  | 1,58299 |
| <b>Slc46a1</b>   | solute carrier family 46, member 1              | 0,0359685 | 0,258387  | 1,58302 |
| <b>Nlrc3</b>     | NLR family, CARD domain containing 3            | 0,0280191 | 0,238017  | 1,58393 |
| <b>Pxk</b>       | PX domain containing serine/threonine kinase    | 0,0017868 | 0,109867  | 1,58557 |
| ---              | ---                                             | 0,0154487 | 0,200278  | 1,58661 |
| ---              | ---                                             | 0,0307826 | 0,246117  | 1,58698 |
| <b>Gna13</b>     | guanine nucleotide binding protein, alpha 13    | 0,0027401 | 0,124236  | 1,58723 |
| <b>Ang3</b>      | angiogenin, ribonuclease A family, member 3     | 0,0347993 | 0,257329  | 1,58732 |
| <b>D9Ert256e</b> | DNA segment, Chr 9, ERATO Doi 256, expresse     | 0,0146048 | 0,19754   | 1,58735 |
| <b>Prnd</b>      | prion protein dublet                            | 0,0013595 | 0,103163  | 1,58934 |
| <b>Plekhh1</b>   | pleckstrin homology domain containing, famil    | 0,0014259 | 0,103881  | 1,58979 |
| <b>Aqp1</b>      | aquaporin 1                                     | 0,0308212 | 0,246215  | 1,5903  |
| <b>Slc39a14</b>  | solute carrier family 39 (zinc transporter), me | 0,0040653 | 0,13684   | 1,59057 |
| <b>Nek6</b>      | NIMA (never in mitosis gene a)-related expres   | 0,028001  | 0,238017  | 1,59114 |
| <b>Myo7a</b>     | myosin VIIA                                     | 0,0357903 | 0,258379  | 1,5922  |

Table S1.

|                                                         |                                                   |           |           |         |
|---------------------------------------------------------|---------------------------------------------------|-----------|-----------|---------|
| ---                                                     | ---                                               | 0,0032828 | 0,13061   | 1,59278 |
| <b>Entpd4</b> /// <b>LOC100862375</b>                   | ectonucleoside triphosphate diphosphohydro        | 0,0150671 | 0,198997  | 1,59364 |
| <b>Peli1</b>                                            | pellino 1                                         | 0,0048711 | 0,14496   | 1,59381 |
| <b>Eif2c4</b>                                           | eukaryotic translation initiation factor 2C, 4    | 0,0155603 | 0,201067  | 1,59386 |
| ---                                                     | ---                                               | 0,016048  | 0,20288   | 1,59391 |
| <b>Trim5</b>                                            | tripartite motif-containing 5                     | 0,0495026 | 0,282053  | 1,59433 |
| <b>Clec16a</b>                                          | C-type lectin domain family 16, member A          | 0,0386342 | 0,263865  | 1,59456 |
| ---                                                     | ---                                               | 0,0371117 | 0,260249  | 1,59518 |
| <b>Lhpp</b>                                             | phospholysine phosphohistidine inorganic pyr      | 0,0318965 | 0,250162  | 1,59846 |
| <b>Ctso</b>                                             | cathepsin O                                       | 0,0497566 | 0,282091  | 1,59855 |
| <b>Mansc1</b>                                           | MANSC domain containing 1                         | 0,0007358 | 0,0849322 | 1,59969 |
| <b>Stat1</b>                                            | signal transducer and activator of transcriptio   | 0,0397355 | 0,265759  | 1,60164 |
| <b>Entpd7</b>                                           | ectonucleoside triphosphate diphosphohydro        | 0,0023062 | 0,119793  | 1,60172 |
| <b>Acvr1c</b>                                           | activin A receptor, type IC                       | 0,0032261 | 0,129936  | 1,60214 |
| <b>Reg3a</b>                                            | regenerating islet-derived 3 alpha                | 0,0053135 | 0,14802   | 1,60264 |
| <b>Apol7b</b> /// <b>Apol7e</b>                         | apolipoprotein L 7b /// apolipoprotein L 7e       | 0,0222829 | 0,224626  | 1,60317 |
| <b>Hist2h2be</b>                                        | histone cluster 2, H2be                           | 0,0178037 | 0,209832  | 1,60372 |
| <b>Zkscan1</b>                                          | zinc finger with KRAB and SCAN domains 1          | 0,0027401 | 0,124236  | 1,60377 |
| <b>2900042A17Rik</b>                                    | RIKEN cDNA 2900042A17 gene                        | 0,024543  | 0,229994  | 1,60442 |
| <b>Asah1</b>                                            | N-acylsphingosine amidohydrolase 1                | 0,0173823 | 0,20885   | 1,60665 |
| <b>Gramd1b</b>                                          | GRAM domain containing 1B                         | 0,0306751 | 0,245889  | 1,60686 |
| <b>Gm20004</b>                                          | predicted gene, 20004                             | 0,003594  | 0,131572  | 1,60719 |
| <b>Ifih1</b>                                            | interferon induced with helicase C domain 1       | 0,0365091 | 0,259258  | 1,60851 |
| <b>1110037F02Rik</b>                                    | RIKEN cDNA 1110037F02 gene                        | 0,026981  | 0,235813  | 1,6089  |
| <b>E230008J23Rik</b>                                    | RIKEN cDNA E230008J23 gene                        | 0,003302  | 0,13061   | 1,60907 |
| <b>Arhgap17</b>                                         | Rho GTPase activating protein 17                  | 0,0470499 | 0,277368  | 1,6091  |
| <b>Rhoq</b>                                             | ras homolog gene family, member Q                 | 0,0005642 | 0,0849322 | 1,6102  |
| ---                                                     | ---                                               | 0,0054056 | 0,148248  | 1,6103  |
| <b>Ccnd1</b>                                            | cyclin D1                                         | 0,0038778 | 0,134489  | 1,61033 |
| <b>Fasl</b>                                             | Fas ligand (TNF superfamily, member 6)            | 0,0237567 | 0,228298  | 1,61068 |
| <b>Aplp1</b>                                            | amyloid beta (A4) precursor-like protein 1        | 0,0197905 | 0,216393  | 1,61163 |
| <b>Ugcg</b>                                             | UDP-glucose ceramide glucosyltransferase          | 0,0274608 | 0,236926  | 1,61241 |
| <b>Slc20a1</b>                                          | solute carrier family 20, member 1                | 0,0011833 | 0,0982265 | 1,61265 |
| <b>Gramd1b</b>                                          | GRAM domain containing 1B                         | 5,52E-05  | 0,0726097 | 1,61462 |
| <b>Hist1h3b</b> /// <b>Hist1h3c</b> /// <b>Hist1h3d</b> | histone cluster 1, H3b /// histone cluster 1, H3c | 0,0405894 | 0,267205  | 1,61593 |
| <b>Slc5a6</b>                                           | solute carrier family 5 (sodium-dependent vita    | 0,0119387 | 0,186618  | 1,61641 |
| <b>AI043046</b>                                         | expressed sequence AI043046                       | 0,0005977 | 0,0849322 | 1,61673 |
| <b>Zdhhc6</b>                                           | zinc finger, DHHC domain containing 6             | 0,0391076 | 0,264405  | 1,61794 |
| <b>Ssr1</b>                                             | Signal sequence receptor, alpha                   | 0,0088073 | 0,170577  | 1,6189  |
| <b>Wipf3</b>                                            | WAS/WASL interacting protein family, membe        | 0,0209366 | 0,219995  | 1,61975 |
| <b>Pcdh9</b>                                            | protocadherin 9                                   | 0,005952  | 0,152151  | 1,62008 |
| <b>Ubc</b>                                              | ubiquitin C                                       | 0,0010935 | 0,0951068 | 1,62085 |
| <b>Abhd2</b>                                            | abhydrolase domain containing 2                   | 0,0473708 | 0,278295  | 1,62137 |
| <b>Mettl7b</b>                                          | methyltransferase like 7B                         | 0,0332591 | 0,252993  | 1,62174 |
| ---                                                     | ---                                               | 0,0256779 | 0,232501  | 1,62181 |
| <b>Fgl2</b>                                             | fibrinogen-like protein 2                         | 0,0069272 | 0,159545  | 1,62219 |
| <b>Bst1</b>                                             | bone marrow stromal cell antigen 1                | 0,0283759 | 0,238692  | 1,62396 |
| <b>Igsf3</b>                                            | immunoglobulin superfamily, member 3              | 0,0102757 | 0,17912   | 1,62397 |
| <b>Edem2</b>                                            | ER degradation enhancer, mannosidase alpha        | 0,0296496 | 0,243156  | 1,62398 |
| <b>Entpd4</b>                                           | ectonucleoside triphosphate diphosphohydro        | 0,0083881 | 0,169445  | 1,62523 |
| <b>Slc5a9</b>                                           | solute carrier family 5 (sodium/glucose cotran    | 0,0127845 | 0,189985  | 1,6255  |
| <b>Abcc2</b>                                            | ATP-binding cassette, sub-family C (CFTR/MRF      | 0,0189611 | 0,213614  | 1,62556 |

Table S1.

|                                  |                                                   |           |           |         |
|----------------------------------|---------------------------------------------------|-----------|-----------|---------|
| <b>Gm19434</b>                   | predicted gene, 19434                             | 0,012011  | 0,186803  | 1,62666 |
| <b>Entpd7</b>                    | ectonucleoside triphosphate diphosphohydro        | 0,002268  | 0,119793  | 1,62703 |
| <b>Ppargc1a</b>                  | peroxisome proliferative activated receptor, g    | 0,0492115 | 0,281424  | 1,62799 |
| <b>3110007F17Rik /// Gm2411</b>  | RIKEN cDNA 3110007F17 gene /// predicted g        | 0,0362038 | 0,258771  | 1,62958 |
| <b>Cyp3a25</b>                   | cytochrome P450, family 3, subfamily a, polyp     | 0,0001311 | 0,0805578 | 1,63102 |
| <b>Hopx</b>                      | HOP homeobox                                      | 0,0136705 | 0,193089  | 1,63121 |
| <b>Amn</b>                       | amnionless                                        | 0,0003689 | 0,0849322 | 1,63245 |
| ---                              | ---                                               | 0,0008193 | 0,0864886 | 1,63276 |
| <b>Xdh</b>                       | xanthine dehydrogenase                            | 0,0373772 | 0,260842  | 1,63364 |
| ---                              | ---                                               | 0,0261723 | 0,234062  | 1,63454 |
| ---                              | ---                                               | 0,0128341 | 0,189985  | 1,63632 |
| <b>Dusp23</b>                    | dual specificity phosphatase 23                   | 0,0066037 | 0,156088  | 1,63633 |
| <b>2010003K11Rik</b>             | RIKEN cDNA 2010003K11 gene                        | 0,0026516 | 0,123202  | 1,64042 |
| ---                              | ---                                               | 0,0054123 | 0,148248  | 1,64267 |
| <b>Gda</b>                       | guanine deaminase                                 | 0,0031389 | 0,128056  | 1,64287 |
| <b>Prkg2</b>                     | protein kinase, cGMP-dependent, type II           | 0,0006038 | 0,0849322 | 1,64319 |
| <b>Dnahc2</b>                    | dynein, axonemal, heavy chain 2                   | 0,0014727 | 0,104066  | 1,64324 |
| <b>Cphx</b>                      | Cytoplasmic polyadenylated homeobox               | 0,0368877 | 0,260059  | 1,64363 |
| <b>Gm10393 /// Gm9780 /// PI</b> | predicted gene 10393 /// predicted gene 9780      | 0,0093053 | 0,1739    | 1,64413 |
| <b>Gda</b>                       | guanine deaminase                                 | 0,0441115 | 0,272416  | 1,64418 |
| ---                              | ---                                               | 0,0088151 | 0,170577  | 1,64482 |
| <b>Tap1</b>                      | transporter 1, ATP-binding cassette, sub-famil    | 0,0446291 | 0,273589  | 1,64493 |
| <b>Abcg8</b>                     | ATP-binding cassette, sub-family G (WHITE), n     | 0,0096365 | 0,176067  | 1,64583 |
| <b>Ccng2</b>                     | cyclin G2                                         | 0,0117645 | 0,185859  | 1,64596 |
| ---                              | ---                                               | 0,0110962 | 0,183584  | 1,64604 |
| ---                              | ---                                               | 0,0131233 | 0,190604  | 1,64626 |
| <b>Ak7</b>                       | adenylate kinase 7                                | 0,0008152 | 0,0864886 | 1,64708 |
| <b>Pafah1b1</b>                  | platelet-activating factor acetylhydrolase, isof  | 0,0066214 | 0,156088  | 1,64722 |
| <b>Homer2</b>                    | homer homolog 2 (Drosophila)                      | 0,0252577 | 0,231452  | 1,64818 |
| <b>Prkg2</b>                     | protein kinase, cGMP-dependent, type II           | 0,0087292 | 0,170474  | 1,65018 |
| <b>Rdh5</b>                      | retinol dehydrogenase 5                           | 0,0017271 | 0,109277  | 1,65041 |
| <b>Leap2</b>                     | liver-expressed antimicrobial peptide 2           | 0,0267644 | 0,235425  | 1,65066 |
| <b>Gpd2</b>                      | glycerol phosphate dehydrogenase 2, mitoch        | 0,0214663 | 0,22139   | 1,65197 |
| <b>Adamtsl5</b>                  | ADAMTS-like 5                                     | 0,0002013 | 0,0831415 | 1,65356 |
| <b>Cml2</b>                      | camello-like 2                                    | 0,035114  | 0,257732  | 1,6537  |
| <b>LOC552908</b>                 | uncharacterized LOC552908                         | 0,0097997 | 0,176669  | 1,65466 |
| <b>Ept1</b>                      | ethanolaminophosphotransferase 1 (CDP-etha        | 0,0242941 | 0,229728  | 1,65489 |
| <b>Wee1</b>                      | WEE 1 homolog 1 (S. pombe)                        | 0,0088479 | 0,170716  | 1,65526 |
| <b>Ace</b>                       | angiotensin I converting enzyme (peptidyl-dip     | 0,0101935 | 0,178809  | 1,6579  |
| <b>Hemgn</b>                     | hemogen                                           | 0,0024595 | 0,120058  | 1,65801 |
| <b>Mfsd2b</b>                    | Major facilitator superfamily domain containi     | 0,0108441 | 0,182345  | 1,66026 |
| <b>Tcea3</b>                     | transcription elongation factor A (SII), 3        | 0,0028204 | 0,124716  | 1,66148 |
| <b>Slc6a3</b>                    | solute carrier family 6 (neurotransmitter trans   | 0,0194551 | 0,215395  | 1,66242 |
| <b>D14Ertd449e</b>               | DNA segment, Chr 14, ERATO Doi 449, expres        | 0,0059967 | 0,152151  | 1,66296 |
| <b>Cmpk2</b>                     | cytidine monophosphate (UMP-CMP) kinase 2         | 0,0274443 | 0,236926  | 1,66306 |
| <b>Hist1h1c</b>                  | histone cluster 1, H1c                            | 0,0116278 | 0,1854    | 1,66554 |
| <b>Tgtp1 /// Tgtp2</b>           | T cell specific GTPase 1 /// T cell specific GTPa | 0,0365852 | 0,259258  | 1,66597 |
| ---                              | ---                                               | 0,0054424 | 0,148673  | 1,67003 |
| <b>Phospho1 /// Zfp652</b>       | phosphatase, orphan 1 /// zinc finger protein     | 0,0128413 | 0,189985  | 1,67237 |
| <b>Usp2</b>                      | ubiquitin specific peptidase 2                    | 0,0040434 | 0,136529  | 1,67242 |
| <b>Pcm1</b>                      | pericentriolar material 1                         | 0,0101306 | 0,178366  | 1,67304 |
| <b>Gstk1</b>                     | glutathione S-transferase kappa 1                 | 0,0213244 | 0,221191  | 1,67343 |



Table S1.

|                      |                                                 |           |           |         |
|----------------------|-------------------------------------------------|-----------|-----------|---------|
| <b>Rgs2</b>          | regulator of G-protein signaling 2              | 0,0173303 | 0,208838  | 1,67496 |
| <b>Arglu1</b>        | arginine and glutamate rich 1                   | 0,0112927 | 0,18408   | 1,67542 |
| <b>Gstm6</b>         | glutathione S-transferase, mu 6                 | 9,59E-05  | 0,0804523 | 1,67632 |
| <b>Ccl6</b>          | chemokine (C-C motif) ligand 6                  | 0,0183973 | 0,212189  | 1,67746 |
| ---                  | ---                                             | 0,0003587 | 0,0849322 | 1,67824 |
| <b>Tgfb1</b>         | transforming growth factor, beta induced        | 0,005602  | 0,149218  | 1,6805  |
| <b>Cml5</b>          | camello-like 5                                  | 0,0265821 | 0,23541   | 1,6815  |
| <b>Gatm</b>          | glycine amidinotransferase (L-arginine:glycine  | 0,0237417 | 0,228298  | 1,68194 |
| <b>2610024D14Rik</b> | RIKEN cDNA 2610024D14 gene                      | 0,004247  | 0,138661  | 1,68238 |
| <b>Edaradd</b>       | EDAR (ectodysplasin-A receptor)-associated d    | 0,0014977 | 0,104066  | 1,68266 |
| <b>Clic6</b>         | chloride intracellular channel 6                | 0,00299   | 0,125847  | 1,68402 |
| <b>Igsf3</b>         | immunoglobulin superfamily, member 3            | 0,0015757 | 0,105602  | 1,68434 |
| <b>Efhd2</b>         | EF hand domain containing 2                     | 0,0096243 | 0,176067  | 1,68659 |
| <b>Apoc3</b>         | apolipoprotein C-III                            | 7,33E-05  | 0,0726097 | 1,6866  |
| ---                  | ---                                             | 0,0374403 | 0,260854  | 1,68671 |
| <b>Per2</b>          | period homolog 2 (Drosophila)                   | 0,0416497 | 0,268297  | 1,68692 |
| ---                  | ---                                             | 0,0019056 | 0,113932  | 1,6884  |
| <b>Usp2</b>          | ubiquitin specific peptidase 2                  | 0,0095523 | 0,175509  | 1,69008 |
| <b>Slc25a22</b>      | solute carrier family 25 (mitochondrial carrier | 0,0152442 | 0,199825  | 1,69093 |
| <b>Ddx58</b>         | DEAD (Asp-Glu-Ala-Asp) box polypeptide 58       | 0,040386  | 0,266941  | 1,69132 |
| <b>D5Ertd579e</b>    | DNA segment, Chr 5, ERATO Doi 579, expresse     | 0,0092667 | 0,173659  | 1,6944  |
| <b>Ace</b>           | angiotensin I converting enzyme (peptidyl-dip   | 0,003032  | 0,125899  | 1,69448 |
| <b>Tmem56</b>        | transmembrane protein 56                        | 0,0125069 | 0,189441  | 1,69458 |
| <b>1700019G17Rik</b> | RIKEN cDNA 1700019G17 gene                      | 0,0005582 | 0,0849322 | 1,69519 |
| <b>Trdmt1</b>        | tRNA aspartic acid methyltransferase 1          | 0,0040846 | 0,136873  | 1,69553 |
| ---                  | ---                                             | 0,0064741 | 0,155345  | 1,69554 |
| <b>Mcoln2</b>        | mucolipin 2                                     | 0,0004165 | 0,0849322 | 1,69612 |
| <b>Sfrp5</b>         | secreted frizzled-related sequence protein 5    | 0,0026759 | 0,123786  | 1,69628 |
| ---                  | ---                                             | 0,0020493 | 0,116766  | 1,69643 |
| <b>Ccr9</b>          | chemokine (C-C motif) receptor 9                | 0,0233151 | 0,227279  | 1,69658 |
| ---                  | ---                                             | 0,0253367 | 0,231521  | 1,69697 |
| <b>Fam46a</b>        | family with sequence similarity 46, member A    | 0,0008431 | 0,0864886 | 1,69742 |
| <b>Aldh1a7</b>       | aldehyde dehydrogenase family 1, subfamily A    | 0,0414434 | 0,268297  | 1,69955 |
| <b>Gstm2</b>         | glutathione S-transferase, mu 2                 | 0,0006063 | 0,0849322 | 1,69992 |
| <b>Fam132a</b>       | family with sequence similarity 132, member     | 0,0054777 | 0,148764  | 1,70134 |
| <b>Dpp4</b>          | dipeptidylpeptidase 4                           | 0,0087965 | 0,170577  | 1,70197 |
| <b>Gstm3</b>         | glutathione S-transferase, mu 3                 | 0,0459387 | 0,275912  | 1,70231 |
| <b>Camk2n1</b>       | calcium/calmodulin-dependent protein kinase     | 0,0001792 | 0,0831415 | 1,70395 |
| <b>Phlpp2</b>        | PH domain and leucine rich repeat protein ph    | 0,0078056 | 0,165767  | 1,704   |
| <b>Fam132a</b>       | family with sequence similarity 132, member     | 0,0036144 | 0,131572  | 1,70447 |
| ---                  | ---                                             | 0,0012512 | 0,0999478 | 1,70509 |
| <b>Gm20021</b>       | predicted gene, 20021                           | 0,0086303 | 0,170303  | 1,70642 |
| <b>Gstm1</b>         | glutathione S-transferase, mu 1                 | 0,0072441 | 0,160297  | 1,70687 |
| <b>Rabgap1l</b>      | RAB GTPase activating protein 1-like            | 0,0278772 | 0,237798  | 1,70929 |
| <b>Acp6</b>          | Acid phosphatase 6, lysophosphatidic            | 0,0232435 | 0,226903  | 1,7104  |
| <b>Tff3</b>          | trefoil factor 3, intestinal                    | 0,032343  | 0,251402  | 1,71325 |
| <b>Dpp4</b>          | dipeptidylpeptidase 4                           | 0,0005081 | 0,0849322 | 1,71521 |
| ---                  | ---                                             | 0,0011032 | 0,0951068 | 1,71556 |
| <b>H2-DMA</b>        | histocompatibility 2, class II, locus DMA       | 0,023653  | 0,228298  | 1,71721 |
| <b>Cyp4v3</b>        | cytochrome P450, family 4, subfamily v, polyp   | 0,0155204 | 0,200631  | 1,72104 |
| <b>Casp3</b>         | caspace 3                                       | 0,0077697 | 0,165436  | 1,72172 |
| <b>Tmem66</b>        | transmembrane protein 66                        | 0,0025347 | 0,121373  | 1,72261 |

Table S1.

|                                  |                                                  |           |           |         |
|----------------------------------|--------------------------------------------------|-----------|-----------|---------|
| <b>Ppargc1a</b>                  | peroxisome proliferative activated receptor, g   | 0,0019158 | 0,114127  | 1,72458 |
| <b>Slc13a2</b>                   | solute carrier family 13 (sodium-dependent di    | 0,0025449 | 0,121505  | 1,72474 |
| <b>Nek6</b>                      | NIMA (never in mitosis gene a)-related expres    | 0,0094189 | 0,174332  | 1,72599 |
| <b>Fut4</b>                      | fucosyltransferase 4                             | 0,0168569 | 0,207102  | 1,72627 |
| <b>Insig1</b>                    | insulin induced gene 1                           | 0,0006009 | 0,0849322 | 1,7269  |
| <b>ligp1</b>                     | interferon inducible GTPase 1                    | 0,0256659 | 0,232457  | 1,73149 |
| <b>Tmem229b</b>                  | transmembrane protein 229B                       | 0,0196289 | 0,215831  | 1,73159 |
| <b>Ltb4r2</b>                    | leukotriene B4 receptor 2                        | 0,0204932 | 0,218142  | 1,7324  |
| <b>Cml2</b>                      | camello-like 2                                   | 0,0386696 | 0,263865  | 1,73615 |
| ---                              | ---                                              | 0,0148819 | 0,198415  | 1,73695 |
| <b>Acy3</b>                      | aspartoacylase (aminoacylase) 3                  | 0,0040807 | 0,136873  | 1,73713 |
| <b>Tef</b>                       | thyrotroph embryonic factor                      | 0,00132   | 0,102302  | 1,74029 |
| <b>Slc37a4</b>                   | solute carrier family 37 (glucose-6-phosphate    | 0,0001938 | 0,0831415 | 1,74043 |
| <b>Pstpip2</b>                   | proline-serine-threonine phosphatase-interac     | 0,0039125 | 0,13512   | 1,74143 |
| <b>Ccl3</b>                      | chemokine (C-C motif) ligand 3                   | 0,0213946 | 0,22133   | 1,74166 |
| ---                              | ---                                              | 0,0015387 | 0,104363  | 1,74318 |
| <b>Tmsb15b2 /// Tmsb15l</b>      | thymosin beta 15b2 /// thymosin beta 15b lik     | 0,0020005 | 0,115014  | 1,74344 |
| <b>9330112F22Rik</b>             | RIKEN cDNA 9330112F22 gene                       | 0,0009826 | 0,0885303 | 1,7438  |
| <b>Ascl2</b>                     | achaete-scute complex homolog 2 (Drosophila      | 0,0365853 | 0,259258  | 1,74395 |
| ---                              | ---                                              | 0,0110371 | 0,183576  | 1,745   |
| <b>Tmem56</b>                    | transmembrane protein 56                         | 0,001964  | 0,114711  | 1,74505 |
| ---                              | ---                                              | 0,0006837 | 0,0849322 | 1,74977 |
| <b>Spns2</b>                     | spinster homolog 2 (Drosophila)                  | 0,0023149 | 0,119793  | 1,75068 |
| <b>Prkg2</b>                     | protein kinase, cGMP-dependent, type II          | 0,0011963 | 0,0985316 | 1,75481 |
| <b>Calm1 /// Calm2 /// Calm3</b> | calmodulin 1 /// calmodulin 2 /// calmodulin 3   | 0,0073197 | 0,161207  | 1,75512 |
| <b>Tmem41b</b>                   | transmembrane protein 41B                        | 0,0116211 | 0,1854    | 1,75778 |
| <b>Gls</b>                       | glutaminase                                      | 0,0039272 | 0,135435  | 1,75975 |
| <b>Edaradd</b>                   | EDAR (ectodysplasin-A receptor)-associated d     | 0,0176935 | 0,209737  | 1,76102 |
| <b>Slc1a5</b>                    | solute carrier family 1 (neutral amino acid tran | 8,91E-05  | 0,0787623 | 1,76428 |
| ---                              | ---                                              | 0,0099971 | 0,17805   | 1,76462 |
| <b>Ccbe1</b>                     | collagen and calcium binding EGF domains 1       | 0,0187852 | 0,213166  | 1,76626 |
| <b>4930551O13Rik</b>             | RIKEN cDNA 4930551O13 gene                       | 0,0326841 | 0,251925  | 1,76744 |
| <b>Rgs2</b>                      | regulator of G-protein signaling 2               | 0,0054385 | 0,148673  | 1,76768 |
| <b>Tmem139</b>                   | transmembrane protein 139                        | 0,0163854 | 0,204614  | 1,76891 |
| <b>Eny2</b>                      | enhancer of yellow 2 homolog (Drosophila)        | 0,0054902 | 0,148764  | 1,76963 |
| <b>Nlrp9b</b>                    | NLR family, pyrin domain containing 9B           | 0,009268  | 0,173659  | 1,77334 |
| <b>Eny2</b>                      | enhancer of yellow 2 homolog (Drosophila)        | 0,0049934 | 0,14588   | 1,77817 |
| <b>Cst6</b>                      | cystatin E/M                                     | 0,0078581 | 0,16602   | 1,77898 |
| <b>Clec16a</b>                   | C-type lectin domain family 16, member A         | 0,0052898 | 0,14802   | 1,77968 |
| <b>Abca1</b>                     | ATP-binding cassette, sub-family A (ABC1), me    | 0,0390094 | 0,264304  | 1,77992 |
| <b>Maf</b>                       | avian musculoaponeurotic fibrosarcoma (v-ma      | 0,0056034 | 0,149218  | 1,78112 |
| <b>Plek2</b>                     | pleckstrin 2                                     | 0,0125397 | 0,189441  | 1,78139 |
| <b>Vegfa</b>                     | vascular endothelial growth factor A             | 0,0220204 | 0,223797  | 1,78188 |
| <b>Psmb8</b>                     | proteasome (prosome, macropain) subunit, bo      | 0,0191742 | 0,214649  | 1,78218 |
| <b>9130017K11Rik</b>             | RIKEN cDNA 9130017K11 gene                       | 0,0006017 | 0,0849322 | 1,78232 |
| <b>Rnf213</b>                    | ring finger protein 213                          | 0,0353101 | 0,257842  | 1,78263 |
| <b>Rab6b</b>                     | RAB6B, member RAS oncogene family                | 0,0211794 | 0,220911  | 1,78383 |
| <b>Abhd6</b>                     | abhydrolase domain containing 6                  | 0,0292404 | 0,241248  | 1,78678 |
| <b>Negr1</b>                     | neuronal growth regulator 1                      | 0,0457848 | 0,275912  | 1,78689 |
| <b>Abcg5</b>                     | ATP-binding cassette, sub-family G (WHITE), n    | 5,97E-05  | 0,0726097 | 1,78767 |
| <b>Greb1</b>                     | gene regulated by estrogen in breast cancer p    | 0,0092914 | 0,173841  | 1,78974 |
| <b>3110007F17Rik /// Gm2411</b>  | RIKEN cDNA 3110007F17 gene /// predicted g       | 0,0071861 | 0,160198  | 1,7937  |

Table S1.

|                            |                                                   |           |           |         |
|----------------------------|---------------------------------------------------|-----------|-----------|---------|
| <b>H2-Ab1</b>              | histocompatibility 2, class II antigen A, beta 1  | 0,0225819 | 0,225647  | 1,7942  |
| <b>Mcoln3</b>              | mucolipin 3                                       | 0,0281427 | 0,238244  | 1,80128 |
| <b>Slc7a2</b>              | solute carrier family 7 (cationic amino acid tra  | 0,0003718 | 0,0849322 | 1,80431 |
| <b>Trpa1</b>               | transient receptor potential cation channel, st   | 0,0260039 | 0,233538  | 1,80633 |
| <b>Tgfb1</b>               | transforming growth factor, beta induced          | 0,0118473 | 0,186102  | 1,82066 |
| <b>1700019G17Rik</b>       | RIKEN cDNA 1700019G17 gene                        | 0,0278164 | 0,237798  | 1,82134 |
| <b>Hpgd</b>                | Hydroxyprostaglandin dehydrogenase 15 (NAI        | 0,0008831 | 0,0864886 | 1,82308 |
| <b>9130004J05Rik</b>       | RIKEN cDNA 9130004J05 gene                        | 0,0384845 | 0,263699  | 1,82323 |
| <b>Tnfsf10</b>             | tumor necrosis factor (ligand) superfamily, me    | 0,0052329 | 0,14802   | 1,82665 |
| <b>Gls</b>                 | glutaminase                                       | 0,0013398 | 0,102769  | 1,82678 |
| <b>Pstpip2</b>             | proline-serine-threonine phosphatase-interac      | 0,0189875 | 0,213839  | 1,82727 |
| <b>Sema5a</b>              | sema domain, seven thrombospondin repeats         | 0,0006608 | 0,0849322 | 1,82805 |
| <b>lyd</b>                 | iodotyrosine deiodinase                           | 0,0079957 | 0,167413  | 1,82849 |
| <b>Ccdc116</b>             | coiled-coil domain containing 116                 | 0,0008713 | 0,0864886 | 1,83261 |
| <b>Pstpip2</b>             | proline-serine-threonine phosphatase-interac      | 0,0033006 | 0,13061   | 1,83672 |
| <b>Slc9a2</b>              | solute carrier family 9 (sodium/hydrogen exch     | 0,0173598 | 0,20885   | 1,83893 |
| <b>Klrd1</b>               | killer cell lectin-like receptor, subfamily D, me | 0,0237168 | 0,228298  | 1,84074 |
| <b>lapp</b>                | islet amyloid polypeptide                         | 0,0028982 | 0,125052  | 1,84088 |
| <b>Aff4</b>                | AF4/FMR2 family, member 4                         | 0,000447  | 0,0849322 | 1,84093 |
| <b>Prkca</b>               | protein kinase C, alpha                           | 0,0461641 | 0,276216  | 1,84318 |
| <b>Gtpbp2</b>              | GTP binding protein 2                             | 0,0140162 | 0,19432   | 1,84556 |
| ---                        | ---                                               | 0,0392366 | 0,264748  | 1,8504  |
| <b>Tef</b>                 | thyrotroph embryonic factor                       | 0,0011715 | 0,097786  | 1,85149 |
| <b>Ttc39c</b>              | tetratricopeptide repeat domain 39C               | 0,0128262 | 0,189985  | 1,85331 |
| <b>Gip</b>                 | gastric inhibitory polypeptide                    | 0,0057567 | 0,150585  | 1,85915 |
| ---                        | ---                                               | 0,0243625 | 0,229817  | 1,86248 |
| <b>Ttc39c</b>              | tetratricopeptide repeat domain 39C               | 0,0066209 | 0,156088  | 1,86295 |
| <b>Rbm39</b>               | RNA binding motif protein 39                      | 0,0268803 | 0,235563  | 1,866   |
| <b>Hpgd</b>                | hydroxyprostaglandin dehydrogenase 15 (NAI        | 0,0007142 | 0,0849322 | 1,86827 |
| <b>Hopx</b>                | HOP homeobox                                      | 0,0103752 | 0,179738  | 1,86848 |
| <b>Cyp2d22</b>             | cytochrome P450, family 2, subfamily d, polyp     | 0,0003267 | 0,0849322 | 1,8699  |
| <b>H2-DMb1 /// H2-DMb2</b> | histocompatibility 2, class II, locus Mb1 /// his | 0,0459319 | 0,275912  | 1,87063 |
| <b>Rec8</b>                | REC8 homolog (yeast)                              | 0,0097133 | 0,176669  | 1,87585 |
| <b>Cyp3a11</b>             | cytochrome P450, family 3, subfamily a, polyp     | 0,0178823 | 0,210167  | 1,88333 |
| <b>Il15</b>                | interleukin 15                                    | 0,0039345 | 0,135435  | 1,88712 |
| <b>H2-Q5</b>               | histocompatibility 2, Q region locus 5            | 0,0348246 | 0,257329  | 1,88777 |
| <b>Dclk1</b>               | doublecortin-like kinase 1                        | 0,0348475 | 0,257329  | 1,88919 |
| <b>Acsm5</b>               | acyl-CoA synthetase medium-chain family me        | 0,002407  | 0,120058  | 1,89064 |
| <b>Vamp3</b>               | vesicle-associated membrane protein 3             | 0,003062  | 0,126444  | 1,89406 |
| ---                        | ---                                               | 0,004659  | 0,144019  | 1,89622 |
| <b>Gas2l3</b>              | growth arrest-specific 2 like 3                   | 0,027475  | 0,236926  | 1,89636 |
| <b>Slc13a1</b>             | solute carrier family 13 (sodium/sulfate sympt    | 0,0465913 | 0,276696  | 1,89656 |
| <b>B3galt1</b>             | beta 1,3-galactosyltransferase-like               | 0,0004562 | 0,0849322 | 1,89873 |
| <b>Clic5</b>               | chloride intracellular channel 5                  | 0,0056093 | 0,149218  | 1,89901 |
| <b>lapp</b>                | islet amyloid polypeptide                         | 0,0251349 | 0,231021  | 1,90254 |
| <b>Lct</b>                 | lactase                                           | 7,64E-06  | 0,0457467 | 1,90704 |
| <b>Per2</b>                | period homolog 2 (Drosophila)                     | 0,0352573 | 0,257842  | 1,91048 |
| <b>Tnik</b>                | TRAF2 and NCK interacting kinase                  | 0,0193062 | 0,214959  | 1,9134  |
| <b>Muc2</b>                | mucin 2                                           | 0,0154325 | 0,200278  | 1,91451 |
| <b>Esrrg</b>               | estrogen-related receptor gamma                   | 0,0400231 | 0,266274  | 1,9205  |
| <b>Clec2e</b>              | C-type lectin domain family 2, member e           | 0,0043845 | 0,140446  | 1,92539 |
| <b>Tmem229b</b>            | transmembrane protein 229B                        | 0,0058998 | 0,151693  | 1,9292  |

Table S1.

|                                 |                                                  |           |           |         |
|---------------------------------|--------------------------------------------------|-----------|-----------|---------|
| <b>Esrrg</b>                    | estrogen-related receptor gamma                  | 0,0028023 | 0,124286  | 1,93175 |
| <b>Sema5a</b>                   | sema domain, seven thrombospondin repeats        | 0,0018373 | 0,112105  | 1,93248 |
| <b>H2-Q6 /// LOC68395</b>       | histocompatibility 2, Q region locus 6 /// histo | 0,034179  | 0,255386  | 1,93672 |
| <b>Pipox</b>                    | pipecolic acid oxidase                           | 0,0014675 | 0,104066  | 1,93978 |
| <b>Mosc1</b>                    | MOCO sulphurase C-terminal domain containi       | 0,032357  | 0,251402  | 1,94211 |
| <b>Prss30</b>                   | protease, serine, 30                             | 0,0059784 | 0,152151  | 1,94478 |
| <b>Rbm39</b>                    | RNA binding motif protein 39                     | 0,0452517 | 0,275232  | 1,94568 |
| <b>Clic5</b>                    | chloride intracellular channel 5                 | 0,0016919 | 0,108097  | 1,94616 |
| <b>Casp3</b>                    | caspase 3                                        | 0,0029007 | 0,125052  | 1,9508  |
| <b>Mep1a</b>                    | meprin 1 alpha                                   | 0,0004186 | 0,0849322 | 1,95439 |
| <b>Hist1h1c</b>                 | histone cluster 1, H1c                           | 0,0086479 | 0,170303  | 1,95947 |
| <b>Nampt</b>                    | nicotinamide phosphoribosyltransferase           | 0,002183  | 0,117875  | 1,96157 |
| <b>Ces2a</b>                    | carboxylesterase 2A                              | 0,0262621 | 0,234224  | 1,96805 |
| <b>Nampt</b>                    | nicotinamide phosphoribosyltransferase           | 0,0008297 | 0,0864886 | 1,9851  |
| <b>Btnl2 /// LOC100862597</b>   | butyrophilin-like 2 /// butyrophilin-like protei | 0,0237356 | 0,228298  | 1,98544 |
| <b>Afp</b>                      | alpha fetoprotein                                | 0,0012301 | 0,0998479 | 1,98611 |
| <b>Ambp</b>                     | alpha 1 microglobulin/bikunin                    | 0,0004837 | 0,0849322 | 1,98631 |
| <b>Gpr133</b>                   | G protein-coupled receptor 133                   | 0,0250004 | 0,230775  | 1,98871 |
| <b>Acsf2</b>                    | acyl-CoA synthetase family member 2              | 0,0132433 | 0,191394  | 1,99299 |
| <b>Sema7a</b>                   | sema domain, immunoglobulin domain (Ig), a       | 0,0106022 | 0,180973  | 1,99325 |
| <b>Cyp2b10</b>                  | cytochrome P450, family 2, subfamily b, polyp    | 0,0127947 | 0,189985  | 1,99849 |
| <b>5033423K11Rik</b>            | RIKEN cDNA 5033423K11 gene                       | 0,0257183 | 0,232579  | 2,00362 |
| <b>6030439D06Rik</b>            | RIKEN cDNA 6030439D06 gene                       | 0,0284284 | 0,238843  | 2,00465 |
| <b>Per3</b>                     | period homolog 3 (Drosophila)                    | 0,0090863 | 0,17254   | 2,01167 |
| <b>Mfsd4</b>                    | major facilitator superfamily domain containi    | 0,0248125 | 0,230738  | 2,01348 |
| ---                             | ---                                              | 0,0405577 | 0,267148  | 2,02013 |
| <b>Adora2b</b>                  | adenosine A2b receptor                           | 0,0312873 | 0,247956  | 2,02117 |
| <b>D14Ert449e /// Gm10395 /</b> | DNA segment, Chr 14, ERATO Doi 449, expres       | 0,0042002 | 0,138073  | 2,02477 |
| <b>Fut4</b>                     | fucosyltransferase 4                             | 0,0172171 | 0,208575  | 2,02497 |
| <b>Bcmo1</b>                    | beta-carotene 15,15'-monooxygenase               | 0,0159218 | 0,202455  | 2,02757 |
| <b>Cyp2b10</b>                  | cytochrome P450, family 2, subfamily b, polyp    | 0,0043553 | 0,139788  | 2,02998 |
| <b>Cyp2b10</b>                  | cytochrome P450, family 2, subfamily b, polyp    | 0,006413  | 0,154787  | 2,03321 |
| <b>H2-Aa</b>                    | histocompatibility 2, class II antigen A, alpha  | 0,0395493 | 0,26527   | 2,03653 |
| <b>Npc1l1</b>                   | NPC1-like 1                                      | 0,000877  | 0,0864886 | 2,0367  |
| <b>Tnfsf10</b>                  | tumor necrosis factor (ligand) superfamily, me   | 0,0172447 | 0,208575  | 2,03777 |
| <b>Efr3b</b>                    | EFR3 homolog B (S. cerevisiae)                   | 0,0099785 | 0,17805   | 2,04034 |
| <b>Osbpl3</b>                   | oxysterol binding protein-like 3                 | 0,0062809 | 0,154177  | 2,04875 |
| <b>5033423K11Rik</b>            | RIKEN cDNA 5033423K11 gene                       | 0,0393756 | 0,264919  | 2,04972 |
| <b>Cpm</b>                      | carboxypeptidase M                               | 0,0158872 | 0,202412  | 2,05235 |
| <b>Per3</b>                     | period homolog 3 (Drosophila)                    | 0,0015294 | 0,104066  | 2,05312 |
| ---                             | ---                                              | 0,0256461 | 0,232457  | 2,06675 |
| <b>Mep1a</b>                    | meprin 1 alpha                                   | 0,0021679 | 0,117467  | 2,06831 |
| <b>Nrg4</b>                     | neuregulin 4                                     | 0,0004347 | 0,0849322 | 2,07139 |
| <b>Ccbe1</b>                    | collagen and calcium binding EGF domains 1       | 0,0385229 | 0,263796  | 2,07174 |
| ---                             | ---                                              | 0,0024359 | 0,120058  | 2,07634 |
| <b>Clic5</b>                    | chloride intracellular channel 5                 | 0,0008216 | 0,0864886 | 2,07779 |
| <b>Guca2b</b>                   | guanylate cyclase activator 2b (retina)          | 0,0005377 | 0,0849322 | 2,08022 |
| <b>4430402I18Rik</b>            | RIKEN cDNA 4430402I18 gene                       | 0,000381  | 0,0849322 | 2,08837 |
| <b>Ang4</b>                     | angiogenin, ribonuclease A family, member 4      | 0,0495495 | 0,282091  | 2,08977 |
| <b>Nudt5</b>                    | nudix (nucleoside diphosphate linked moiety)     | 0,0087356 | 0,170474  | 2,09307 |
| <b>Per3</b>                     | Period homolog 3 (Drosophila)                    | 0,0022065 | 0,118676  | 2,11015 |
| <b>4933440K10Rik</b>            | RIKEN cDNA 4933440K10 gene                       | 0,0224659 | 0,225314  | 2,13143 |

Table S1.

|                                      |                                                  |           |                  |         |
|--------------------------------------|--------------------------------------------------|-----------|------------------|---------|
| ---                                  | ---                                              | 0,0082672 | 0,169163         | 2,13457 |
| <b>Mertk</b>                         | c-mer proto-oncogene tyrosine kinase             | 0,0001324 | <b>0,0805578</b> | 2,14572 |
| <b>Tnfsf10</b>                       | tumor necrosis factor (ligand) superfamily, me   | 0,0053497 | 0,14802          | 2,14983 |
| <b>Trdmt1</b>                        | tRNA aspartic acid methyltransferase 1           | 0,0203116 | 0,217253         | 2,15704 |
| <b>Gstm1</b>                         | glutathione S-transferase, mu 1                  | 0,0003382 | <b>0,0849322</b> | 2,16056 |
| ---                                  | ---                                              | 0,0499189 | 0,282456         | 2,16176 |
| <b>Chn2</b>                          | chimerin (chimaerin) 2                           | 0,003765  | 0,13299          | 2,16251 |
| ---                                  | ---                                              | 0,006728  | 0,157284         | 2,16496 |
| <b>Adora2b</b>                       | adenosine A2b receptor                           | 0,0427949 | 0,270276         | 2,165   |
| <b>Lect2</b>                         | leukocyte cell-derived chemotaxin 2              | 0,0008545 | <b>0,0864886</b> | 2,16539 |
| <b>Nudt5</b>                         | nudix (nucleoside diphosphate linked moiety 5)   | 0,0085983 | 0,170243         | 2,16864 |
| <b>1300014I06Rik</b>                 | RIKEN cDNA 1300014I06 gene                       | 0,0394589 | 0,264936         | 2,17362 |
| <b>H2-T10 /// H2-T22 /// H2-T9</b>   | histocompatibility 2, T region locus 10 /// hist | 0,0237269 | 0,228298         | 2,17531 |
| <b>Rgs13</b>                         | regulator of G-protein signaling 13              | 0,0340557 | 0,255162         | 2,17647 |
| <b>Tgfb1</b>                         | transforming growth factor, beta induced         | 5,02E-05  | <b>0,0726097</b> | 2,18519 |
| <b>Mtmr7</b>                         | myotubularin related protein 7                   | 0,0037452 | 0,13299          | 2,18688 |
| <b>Clic5</b>                         | chloride intracellular channel 5                 | 0,0002093 | <b>0,0834826</b> | 2,18869 |
| <b>A630038E17Rik</b>                 | RIKEN cDNA A630038E17 gene                       | 0,0224179 | 0,225067         | 2,19397 |
| <b>Igk-V1 /// Igkv9-120</b>          | immunoglobulin kappa chain variable 1 (V1) /     | 0,0185286 | 0,21244          | 2,19426 |
| <b>Slc23a1</b>                       | solute carrier family 23 (nucleobase transport   | 0,0130667 | 0,190354         | 2,1991  |
| <b>Dio1</b>                          | deiodinase, iodothyronine, type I                | 0,0029967 | 0,125847         | 2,19945 |
| <b>Cd209a</b>                        | CD209a antigen                                   | 0,002229  | 0,11892          | 2,20394 |
| <b>Tmc7</b>                          | transmembrane channel-like gene family 7         | 0,012205  | 0,187704         | 2,20975 |
| <b>Tef</b>                           | thyrotroph embryonic factor                      | 0,0002423 | <b>0,0849322</b> | 2,21434 |
| <b>Rps4y2</b>                        | ribosomal protein S4, Y-linked 2                 | 0,0147849 | 0,198206         | 2,21439 |
| <b>H2-Q7 /// H2-Q8 /// H2-Q9</b>     | histocompatibility 2, Q region locus 7 /// histo | 0,027801  | 0,237798         | 2,21454 |
| <b>Gdap10</b>                        | ganglioside-induced differentiation-associated   | 0,007967  | 0,167027         | 2,22134 |
| <b>Osbp13</b>                        | oxysterol binding protein-like 3                 | 0,0001007 | <b>0,0805578</b> | 2,22173 |
| <b>Tgfb1</b>                         | transforming growth factor, beta induced         | 2,51E-05  | <b>0,0726097</b> | 2,22486 |
| <b>Sema7a</b>                        | sema domain, immunoglobulin domain (Ig), a       | 0,0031155 | 0,127846         | 2,23346 |
| <b>Chn2</b>                          | chimerin (chimaerin) 2                           | 0,0002913 | <b>0,0849322</b> | 2,23427 |
| ---                                  | ---                                              | 0,0005402 | <b>0,0849322</b> | 2,24139 |
| ---                                  | ---                                              | 5,47E-05  | <b>0,0726097</b> | 2,25252 |
| <b>Hlf</b>                           | hepatic leukemia factor                          | 0,0001312 | <b>0,0805578</b> | 2,26266 |
| <b>Itln1 /// Itlnb /// LOC100862</b> | intelectin 1 (galactofuranose binding) /// intel | 0,0144754 | 0,19689          | 2,2634  |
| <b>Eepd1</b>                         | endonuclease/exonuclease/phosphatase fami        | 0,0014896 | 0,104066         | 2,26363 |
| <b>Cym</b>                           | chymosin                                         | 0,0272328 | 0,236497         | 2,26397 |
| <b>Iapp</b>                          | islet amyloid polypeptide                        | 2,92E-05  | <b>0,0726097</b> | 2,28549 |
| <b>Maf</b>                           | avian musculoaponeurotic fibrosarcoma (v-ma      | 0,0092093 | 0,173397         | 2,3056  |
| <b>0610005C13Rik</b>                 | RIKEN cDNA 0610005C13 gene                       | 0,0029626 | 0,125632         | 2,32534 |
| ---                                  | ---                                              | 0,0407236 | 0,267335         | 2,3547  |
| <b>BC089597</b>                      | cDNA sequence BC089597                           | 0,0004277 | <b>0,0849322</b> | 2,35651 |
| <b>Acot12</b>                        | acyl-CoA thioesterase 12                         | 0,0131459 | 0,190828         | 2,36816 |
| <b>Acaa1b</b>                        | acetyl-Coenzyme A acyltransferase 1B             | 0,0057165 | 0,150585         | 2,37169 |
| <b>Ces1g</b>                         | carboxylesterase 1G                              | 0,002259  | 0,119793         | 2,37979 |
| ---                                  | ---                                              | 0,001427  | 0,103881         | 2,38291 |
| <b>2600001M11Rik /// Nudt5</b>       | RIKEN cDNA 2600001M11 gene /// nudix (nuc        | 0,0013774 | 0,103511         | 2,4064  |
| ---                                  | ---                                              | 0,0005875 | <b>0,0849322</b> | 2,40643 |
| <b>Hsd17b13</b>                      | hydroxysteroid (17-beta) dehydrogenase 13        | 0,0408106 | 0,267335         | 2,44013 |
| <b>Ear3</b>                          | eosinophil-associated, ribonuclease A family, r  | 0,0274391 | 0,236926         | 2,44333 |
| <b>Sema5a</b>                        | sema domain, seven thrombospondin repeats        | 0,0137799 | 0,19383          | 2,45271 |
| <b>Slc44a4</b>                       | solute carrier family 44, member 4               | 0,0160317 | 0,20288          | 2,46859 |

Table S1.

|                                    |                                                  |           |           |         |
|------------------------------------|--------------------------------------------------|-----------|-----------|---------|
| <b>Reg4</b>                        | regenerating islet-derived family, member 4      | 0,0158116 | 0,202351  | 2,46878 |
| <b>Sst</b>                         | somatostatin                                     | 0,0027932 | 0,124286  | 2,51237 |
| <b>Gstm1</b>                       | glutathione S-transferase, mu 1                  | 0,0006017 | 0,0849322 | 2,54021 |
| <b>Gdpd2</b>                       | glycerophosphodiester phosphodiesterase do       | 0,0003217 | 0,0849322 | 2,55215 |
| <b>2310007B03Rik</b>               | RIKEN cDNA 2310007B03 gene                       | 0,0002055 | 0,0831415 | 2,57261 |
| <b>Slc20a1</b>                     | solute carrier family 20, member 1               | 0,0004119 | 0,0849322 | 2,57518 |
| ---                                | ---                                              | 0,0093912 | 0,174016  | 2,57546 |
| <b>Gm10393 /// Gm9780 /// Pl</b>   | predicted gene 10393 /// predicted gene 9780     | 0,0003255 | 0,0849322 | 2,60725 |
| <b>Fras1</b>                       | Fraser syndrome 1 homolog (human)                | 0,000193  | 0,0831415 | 2,66639 |
| <b>Gstm1</b>                       | glutathione S-transferase, mu 1                  | 0,0003376 | 0,0849322 | 2,70216 |
| <b>Ywhaz</b>                       | tyrosine 3-monooxygenase/tryptophan 5-mor        | 0,0007845 | 0,0864886 | 2,713   |
| <b>Agmat</b>                       | agmatine ureohydrolase (agmatinase)              | 0,0002059 | 0,0831415 | 2,71734 |
| <b>Bbox1</b>                       | butyrobetaine (gamma), 2-oxoglutarate dioxy      | 0,0009773 | 0,0882982 | 2,72906 |
| <b>Ifit3</b>                       | interferon-induced protein with tetratricopep    | 0,0265777 | 0,23541   | 2,7371  |
| <b>Per3</b>                        | period homolog 3 (Drosophila)                    | 0,0017817 | 0,109867  | 2,75033 |
| <b>Slc20a1</b>                     | solute carrier family 20, member 1               | 0,0003248 | 0,0849322 | 2,77176 |
| <b>Per3</b>                        | period homolog 3 (Drosophila)                    | 0,0002369 | 0,0849322 | 2,78098 |
| <b>Bbox1</b>                       | butyrobetaine (gamma), 2-oxoglutarate dioxy      | 0,0180277 | 0,21057   | 2,78415 |
| <b>Per2</b>                        | period homolog 2 (Drosophila)                    | 0,0010179 | 0,0912052 | 2,81603 |
| <b>Slc14a1</b>                     | solute carrier family 14 (urea transporter), me  | 0,0018747 | 0,113543  | 2,82264 |
| <b>Pnliprp2</b>                    | pancreatic lipase-related protein 2              | 0,0109809 | 0,183113  | 2,85984 |
| <b>Clps</b>                        | colipase, pancreatic                             | 0,004201  | 0,138073  | 2,86067 |
| <b>Gsdmc</b>                       | gasdermin C                                      | 0,011682  | 0,1854    | 2,8762  |
| <b>S100g</b>                       | S100 calcium binding protein G                   | 0,0008205 | 0,0864886 | 2,90015 |
| <b>Otop3</b>                       | otopetrin 3                                      | 0,0009117 | 0,0869294 | 2,98421 |
| <b>Dao</b>                         | D-amino acid oxidase                             | 0,0001386 | 0,0824086 | 3,05239 |
| <b>Hist1h2bc /// Hist1h2be ///</b> | histone cluster 1, H2bc /// histone cluster 1, H | 0,0006852 | 0,0849322 | 3,07038 |
| <b>Ugt2b5</b>                      | UDP glucuronosyltransferase 2 family, polypep    | 0,0079144 | 0,166361  | 3,08691 |
| <b>Dap</b>                         | death-associated protein                         | 0,0066039 | 0,156088  | 3,09163 |
| <b>Igtp</b>                        | interferon gamma induced GTPase                  | 0,0281255 | 0,238244  | 3,09668 |
| ---                                | ---                                              | 0,0023258 | 0,119793  | 3,10516 |
| <b>Ccl24</b>                       | chemokine (C-C motif) ligand 24                  | 0,0191407 | 0,214603  | 3,11524 |
| <b>Mcoln3</b>                      | mucolipin 3                                      | 0,019548  | 0,215725  | 3,13056 |
| <b>Clps</b>                        | colipase, pancreatic                             | 0,0347464 | 0,257274  | 3,23402 |
| <b>Cth</b>                         | cystathionase (cystathionine gamma-lyase)        | 2,23E-05  | 0,0726097 | 3,23901 |
| <b>D530039A21Rik</b>               | RIKEN cDNA D530039A21 gene                       | 0,0113044 | 0,18408   | 3,28731 |
| <b>Vps52</b>                       | vacuolar protein sorting 52 (yeast)              | 0,0319219 | 0,250241  | 3,32227 |
| <b>Fbp1</b>                        | fructose bisphosphatase 1                        | 0,0014429 | 0,104066  | 3,35717 |
| <b>Nrn1</b>                        | neuritin 1                                       | 0,0071746 | 0,160198  | 3,3839  |
| <b>Sphk2</b>                       | sphingosine kinase 2                             | 0,0017442 | 0,109277  | 3,40709 |
| <b>Dap</b>                         | death-associated protein                         | 9,20E-05  | 0,0791844 | 3,50326 |
| <b>Dbp</b>                         | D site albumin promoter binding protein          | 0,0006804 | 0,0849322 | 3,6216  |
| <b>Slc36a1</b>                     | solute carrier family 36 (proton/amino acid sy   | 0,0037079 | 0,132893  | 3,67383 |
| <b>Pldn</b>                        | pallidin                                         | 0,0116769 | 0,1854    | 3,77414 |
| <b>Dbp</b>                         | D site albumin promoter binding protein          | 0,0007397 | 0,0849322 | 3,77502 |
| <b>Usp18</b>                       | ubiquitin specific peptidase 18                  | 0,0339439 | 0,255161  | 3,85699 |
| <b>Afp</b>                         | alpha fetoprotein                                | 0,0020782 | 0,116965  | 3,88046 |
| <b>Susd2</b>                       | sushi domain containing 2                        | 0,0085707 | 0,170163  | 3,97551 |
| <b>Slc5a4b</b>                     | solute carrier family 5 (neutral amino acid tra  | 0,0044399 | 0,140705  | 3,98698 |
| <b>Afp</b>                         | alpha fetoprotein                                | 0,0001494 | 0,0831415 | 4,03546 |
| <b>Huwe1</b>                       | HECT, UBA and WWE domain containing 1            | 0,0006023 | 0,0849322 | 4,1452  |
| <b>Slc5a4a</b>                     | solute carrier family 5, member 4a               | 7,95E-06  | 0,0457467 | 4,22649 |

Table S1.

|                                 |                                                 |           |           |         |
|---------------------------------|-------------------------------------------------|-----------|-----------|---------|
| <b>Cubn</b>                     | cubilin (intrinsic factor-cobalamin receptor)   | 5,69E-05  | 0,0726097 | 4,36201 |
| <b>C920025E04Rik /// H2-T23</b> | RIKEN cDNA C920025E04 gene /// histocompa       | 0,0232251 | 0,226903  | 4,41743 |
| <b>Slc14a1</b>                  | solute carrier family 14 (urea transporter), me | 0,0020934 | 0,116965  | 4,42131 |
| <b>Mtmr7</b>                    | myotubularin related protein 7                  | 0,0337883 | 0,254619  | 4,57238 |
| <b>Cubn</b>                     | cubilin (intrinsic factor-cobalamin receptor)   | 0,0005952 | 0,0849322 | 4,71539 |
| <b>Casp9</b>                    | caspase 9                                       | 4,25E-05  | 0,0726097 | 4,79596 |
| <b>Vwa1</b>                     | von Willebrand factor A domain containing 1     | 0,0015015 | 0,104066  | 5,17822 |
| <b>Gsdmc2 /// Gsdmc4</b>        | gasdermin C2 /// gasdermin C4                   | 0,0033438 | 0,130662  | 5,46347 |
| <b>Ido1</b>                     | indoleamine 2,3-dioxygenase 1                   | 0,0176474 | 0,209439  | 6,09459 |
| <b>Hlf</b>                      | hepatic leukemia factor                         | 0,0001023 | 0,0805578 | 7,63315 |
| <b>H2-Eb1</b>                   | histocompatibility 2, class II antigen E beta   | 0,0426568 | 0,270264  | 9,44286 |
| <b>Afp</b>                      | alpha fetoprotein                               | 0,0001287 | 0,0805578 | 9,50652 |
| <b>Slc23a1</b>                  | solute carrier family 23 (nucleobase transport  | 0,000338  | 0,0849322 | 9,63562 |
| <b>Gsdmc2</b>                   | gasdermin C2                                    | 0,000932  | 0,0874427 | 10,0645 |

Table S2.

| Gene name       | Student's t-test q-value | Student's t-test Difference log2 |
|-----------------|--------------------------|----------------------------------|
| Rce1            | 0                        | -3,561492284                     |
| Tut1            | 0                        | -3,305575689                     |
| Sh2d6           | 0                        | 3,758471171                      |
| Spink4          | 0                        | 5,105265935                      |
| Hsd17b7         | 0                        | 2,569128036                      |
| Anxa13          | 0                        | -2,605108897                     |
| Gsdmc2          | 0                        | 5,261334737                      |
| Rpl37           | 0                        | 5,345128377                      |
| Cyp3a25;Cyp3a59 | 0                        | -7,113356908                     |
| Abcg5           | 0                        | -5,796192805                     |
| Tbc1d24         | 0                        | -3,113243103                     |
| Prdx6b          | 0                        | -2,987273534                     |
| Avil            | 0                        | 4,290079117                      |
| Abcg8           | 0                        | -4,738356272                     |
| Abcc3           | 0                        | -1,911993027                     |
| Zdhhc5          | 0                        | 2,384239833                      |
| Sh2d4a          | 0                        | 2,708594004                      |
| Lrch4           | 0                        | 4,249725342                      |
| Fbp1            | 0                        | -2,887975057                     |
| Stab1           | 0                        | 2,895377477                      |
| Swi5            | 0                        | 2,999487559                      |
| Mpp6            | 0                        | -2,880583445                     |
| Akr1b7          | 0                        | -2,065309525                     |
| 2210407C18Rik   | 0                        | -2,335286458                     |
| Cftr            | 0                        | -3,430060705                     |
| Rps29           | 0                        | 2,873217265                      |
| Gstm3           | 0                        | -3,109055837                     |
| Hsd17b2         | 0                        | -3,94479243                      |
| Tmem181a        | 0                        | -3,374627431                     |
| Ang4            | 0                        | 4,230358124                      |
| Nup85           | 0                        | -4,27689298                      |
| Duoxa2          | 0                        | 6,045036316                      |
| Prkci           | 0                        | -3,986339569                     |
| Tubb3           | <b>0,003647059</b>       | 3,697418849                      |
| Tmem14c         | <b>0,006842105</b>       | -5,082531611                     |
| Rpl39           | <b>0,007027027</b>       | 2,251173655                      |
| Grb7            | <b>0,007222222</b>       | 5,183835983                      |
| Hmgcr           | <b>0,007428571</b>       | 3,638182322                      |
| Rpp30           | <b>0,0094</b>            | 3,905248006                      |
| Rabac1          | <b>0,009641026</b>       | 4,076171239                      |
| Krt20           | <b>0,010535211</b>       | -1,219841003                     |
| Acot11          | <b>0,010609929</b>       | -1,181177775                     |
| Ggct            | <b>0,010685714</b>       | -2,647069931                     |
| Xdh             | <b>0,01076259</b>        | -1,944644928                     |
| Mkrn1           | <b>0,01084058</b>        | 1,084830602                      |
| Irgm2           | <b>0,010869565</b>       | -2,418231328                     |
| Pnliprp2        | <b>0,010919708</b>       | 3,369945526                      |
| Sdf4            | <b>0,011</b>             | -0,848723729                     |
| Psme1           | <b>0,011081481</b>       | -0,90858078                      |
| Krt79           | <b>0,011111111</b>       | 4,863065084                      |
| Hacd2           | <b>0,011164179</b>       | 1,668979009                      |



Table S2.

|                                |                    |              |
|--------------------------------|--------------------|--------------|
| Gyg;Gyg1                       | <b>0,01124812</b>  | 1,185599009  |
| Acaa1b                         | <b>0,011333333</b> | -3,87232399  |
| Myo7a                          | <b>0,011363636</b> | -3,533905665 |
| Syn1                           | <b>0,011412587</b> | 2,443011602  |
| Ighv8-8                        | <b>0,011419847</b> | -3,535821915 |
| Igf2r                          | <b>0,011457627</b> | -0,957439423 |
| Selk                           | <b>0,011507692</b> | 2,700767517  |
| Ccdc6                          | <b>0,011522727</b> | -0,92812411  |
| Serpinb2                       | <b>0,011588571</b> | 3,2469546    |
| Efnb2                          | <b>0,011596899</b> | -1,336685816 |
| Rab43                          | <b>0,011627907</b> | -1,592569351 |
| Cpn2                           | <b>0,011655172</b> | -3,556566874 |
| Atg4b                          | <b>0,0116875</b>   | -3,031484604 |
| Sqle                           | <b>0,011706667</b> | 3,245573044  |
| Ido1                           | <b>0,011722543</b> | -4,336569468 |
| Abhd6                          | <b>0,011744681</b> | -1,424830755 |
| Adh6a                          | <b>0,011767442</b> | -1,785588582 |
| Abcc2                          | <b>0,011779528</b> | -2,036511103 |
| Tubb2a;Tubb2b                  | <b>0,011785235</b> | 2,157501221  |
| P4ha1                          | <b>0,011790698</b> | 1,914907455  |
| Rptor                          | <b>0,011825</b>    | -2,158711116 |
| Snrpd3                         | <b>0,011859649</b> | -0,932710012 |
| Brox                           | <b>0,011864865</b> | -1,242764791 |
| Cyp3a11                        | <b>0,011870968</b> | -1,623118718 |
| Nxf1                           | <b>0,011873016</b> | 3,729572296  |
| Scin                           | <b>0,011899371</b> | 1,465665817  |
| Agmat                          | <b>0,011904762</b> | -1,608870188 |
| Retnlb                         | <b>0,011905882</b> | 2,610887527  |
| S100g                          | <b>0,011929412</b> | -2,619778315 |
| Chga                           | <b>0,011945578</b> | -1,592248281 |
| Rps27l                         | <b>0,011955556</b> | 2,935312271  |
| Mttp                           | <b>0,011968</b>    | -1,318284353 |
| Me2                            | <b>0,011974684</b> | -1,050725301 |
| Skiv2l2                        | <b>0,012</b>       | -1,006560644 |
| Ddc                            | <b>0,012</b>       | -1,900332769 |
| Tmprss15                       | <b>0,012022346</b> | -1,745124181 |
| Plac8                          | <b>0,012027397</b> | -1,893887838 |
| Huwe1                          | <b>0,012047619</b> | -1,070891698 |
| Apol10a                        | <b>0,012050955</b> | -3,651602427 |
| Chil4                          | <b>0,012064516</b> | 3,631502151  |
| Atpif1                         | <b>0,012071429</b> | -1,138995488 |
| Ugt2b34                        | <b>0,012089888</b> | -1,6533343   |
| Defa23                         | <b>0,012110345</b> | 4,673302333  |
| Pnpla6                         | <b>0,012128205</b> | -1,558227539 |
| Foxred1                        | <b>0,012131868</b> | 2,891393026  |
| Acss1                          | <b>0,012143713</b> | 1,300765355  |
| Gpx2                           | <b>0,012162602</b> | 2,747873306  |
| Ugt2b38;Ugt2b5;Ugt2b17;Ugt2b37 | <b>0,012192771</b> | -5,384475072 |
| Rps27                          | <b>0,012194444</b> | 3,971792857  |
| Colgalt1                       | <b>0,012195122</b> | 2,395249049  |
| Wdr18                          | <b>0,012206452</b> | -1,057434082 |
| Tmem51                         | <b>0,012216867</b> | -2,16950798  |

Table S2.

|                                |                    |              |
|--------------------------------|--------------------|--------------|
| Duox2                          | <b>0,012261682</b> | 3,664944967  |
| Rpia                           | <b>0,012262295</b> | -1,442696889 |
| Pon1                           | <b>0,012266667</b> | 2,447975159  |
| Uqcrh                          | <b>0,012285714</b> | 1,480026245  |
| Cyp2d22                        | <b>0,012290909</b> | -1,778741837 |
| Tmed3                          | <b>0,012315789</b> | 1,457261403  |
| Map2k4                         | <b>0,012341463</b> | 2,002801895  |
| Krt32;Krt36;Krt33b;Krt31;Krt35 | <b>0,012363636</b> | -4,286383947 |
| Rbks                           | <b>0,012365854</b> | -1,126300176 |
| Rps26                          | <b>0,012366013</b> | 1,061855316  |
| Gmfg                           | <b>0,012377358</b> | 2,518304825  |
| Abcb6                          | <b>0,012404494</b> | -3,379390717 |
| Ctse                           | <b>0,012424779</b> | 2,956005732  |
| Elac2                          | <b>0,012441718</b> | -1,009771983 |
| Cfap20                         | <b>0,012447368</b> | 2,787312826  |
| Fkbp4                          | <b>0,012466667</b> | -0,767496109 |
| Phykpl                         | <b>0,012493827</b> | 1,599524816  |
| Nop9                           | <b>0,012495238</b> | -3,652545293 |
| Gsn                            | <b>0,012518519</b> | 1,120968501  |
| Smpd13b                        | <b>0,012529801</b> | -1,686282476 |
| Fastkd2                        | <b>0,012535714</b> | -0,999604543 |
| Baiap211                       | <b>0,012545455</b> | -1,11504364  |
| Capn13                         | <b>0,012571429</b> | 4,372180939  |
| Rps15                          | <b>0,012583333</b> | 1,970491409  |
| Sarg                           | <b>0,012596273</b> | 1,181954702  |
| Agpat1                         | <b>0,012615385</b> | 1,48637708   |
| Mov10                          | <b>0,012648649</b> | -1,28861618  |
| Lct                            | <b>0,01265</b>     | -8,739983241 |
| Clca1                          | <b>0,012677966</b> | 1,656977336  |
| Lsm5                           | <b>0,012689655</b> | -2,771149953 |
| Serp1;Serp2                    | <b>0,012715789</b> | 4,714055379  |
| Rdh9                           | <b>0,012737864</b> | -3,059501012 |
| Hn1                            | <b>0,012763636</b> | 2,202843984  |
| Prkca                          | <b>0,012786325</b> | -1,092013041 |
| Smyd5                          | <b>0,012810127</b> | -1,319195429 |
| Ndufb11                        | <b>0,012862745</b> | 1,024429321  |
| Atxn2                          | <b>0,012880734</b> | 4,011669159  |
| Brk1                           | <b>0,012896552</b> | -0,595505397 |
| Pla2g4c                        | <b>0,012974359</b> | 7,435346603  |
| Gpr128                         | <b>0,012990099</b> | -2,014383952 |
| Papss2                         | <b>0,013</b>       | -1,246315002 |
| Cluh                           | <b>0,013008696</b> | 2,372016271  |
| Adprhl2                        | <b>0,013106383</b> | 4,112414678  |
| Tex264                         | <b>0,01312</b>     | 3,577977498  |
| Gys1                           | <b>0,013142857</b> | 2,389410655  |
| Cyp2b10                        | <b>0,013192982</b> | -3,145587921 |
| Mocs1                          | <b>0,01319337</b>  | -1,248012543 |
| Entpd5                         | <b>0,013252525</b> | -1,555236181 |
| Serpinb5                       | <b>0,013315789</b> | 1,735587438  |
| Ugdh                           | <b>0,013387755</b> | -1,633443197 |
| Ces1f                          | <b>0,013428571</b> | -6,635749817 |
| Dld                            | <b>0,013493333</b> | 0,747339884  |

Table S2.

|                    |                    |              |
|--------------------|--------------------|--------------|
| Alox5              | <b>0,013525773</b> | 3,543375015  |
| Serf2;Serf1        | <b>0,013672727</b> | 2,210029602  |
| S100a8             | <b>0,013675676</b> | 4,258649826  |
| Micu1              | <b>0,013692308</b> | -1,277879079 |
| Tjap1              | <b>0,013863014</b> | -1,001898448 |
| Mtnd2              | <b>0,013925926</b> | 4,348999659  |
| Ndrp2              | <b>0,014055556</b> | 1,690256119  |
| Rnf181             | <b>0,014188679</b> | -0,997849782 |
| Dclk1              | <b>0,014253521</b> | 2,37528038   |
| Efnb1              | <b>0,014295082</b> | -1,484781265 |
| Vdr                | <b>0,014457143</b> | -2,021091461 |
| Fth1               | <b>0,014461538</b> | -2,648777008 |
| Il18               | <b>0,014468085</b> | -1,452742259 |
| Slc4a7             | <b>0,014545455</b> | -0,988777161 |
| Abr                | <b>0,014623656</b> | -1,194278717 |
| Synrg              | <b>0,014666667</b> | -1,153437932 |
| Dynll1;BC048507    | <b>0,014702703</b> | 1,697318395  |
| Defa-rs1;Gm14851   | <b>0,014745098</b> | -2,586245219 |
| B4galnt1           | <b>0,014782609</b> | -1,257627487 |
| Lgals3bp           | <b>0,014882353</b> | -1,318120321 |
| Maoa               | <b>0,01504</b>     | -1,756144842 |
| Mlkl               | <b>0,015050847</b> | -2,075286865 |
| Nmes1;AA467197     | <b>0,015104478</b> | 2,013729731  |
| Ugt1a1             | <b>0,015310345</b> | -3,938533147 |
| Synpo              | <b>0,015333333</b> | 3,633236567  |
| Ces1               | <b>0,015346939</b> | -3,87300237  |
| Gstk1              | <b>0,015365079</b> | -1,66036733  |
| Gm8909             | <b>0,015569231</b> | -3,428406398 |
| Dnajb2             | <b>0,015666667</b> | 2,325461706  |
| Gsdmc3             | <b>0,0158125</b>   | 4,599916458  |
| Sod1               | <b>0,016</b>       | -1,126162211 |
| Otop3              | <b>0,016063492</b> | -3,814849854 |
| Lhpp               | <b>0,016322581</b> | -2,440311432 |
| AU040320;Kiaa0319l | <b>0,016460733</b> | -1,165500005 |
| Slc39a14           | <b>0,016590164</b> | -1,748009364 |
| Psme2              | <b>0,016695652</b> | -1,127153397 |
| Mep1b              | <b>0,016704846</b> | -2,182977676 |
| Rfc3               | <b>0,016776699</b> | -0,954274495 |
| Ear1               | <b>0,016778761</b> | 4,545760473  |
| Slc6a6             | <b>0,016807512</b> | -0,932935715 |
| Trrap              | <b>0,016853333</b> | -1,769045512 |
| Mgam               | <b>0,016858537</b> | -1,953552246 |
| Hmgcs1             | <b>0,016866667</b> | 1,427293142  |
| Rpl28              | <b>0,016886792</b> | 1,643463135  |
| Mical1             | <b>0,016928571</b> | -1,029553731 |
| Pnkd               | <b>0,016929293</b> | 1,870993296  |
| Frg1               | <b>0,016941176</b> | 2,893075307  |
| Uba6               | <b>0,016966825</b> | -0,766638438 |
| Gimd1              | <b>0,017004484</b> | -2,249171575 |
| Pdxdc1             | <b>0,017015228</b> | -0,566835403 |
| Ercc2              | <b>0,017024631</b> | -1,575855255 |
| Epha2              | <b>0,017047619</b> | -1,663699468 |

Table S2.

|                |                    |              |
|----------------|--------------------|--------------|
| Slc27a4        | <b>0,017081081</b> | -0,998261134 |
| Ca2;Car2       | <b>0,017102041</b> | 1,197886149  |
| Plin3          | <b>0,017108911</b> | -0,998992284 |
| Trim31         | <b>0,017129187</b> | -1,080083211 |
| Lipt2          | <b>0,017158371</b> | 1,889917374  |
| Soat1          | <b>0,017189744</b> | 0,975967407  |
| Rpl18a         | <b>0,01719403</b>  | 2,64995575   |
| Hip1r          | <b>0,017211538</b> | -0,47799174  |
| Snx5           | <b>0,01722807</b>  | -0,623763402 |
| Cyp2c55        | <b>0,017236364</b> | -4,454121272 |
| Nmral1         | <b>0,017278351</b> | -1,02027003  |
| Cbr1           | <b>0,01728</b>     | -1,49989446  |
| Hmgn5          | <b>0,017315068</b> | -0,991392136 |
| Fhit           | <b>0,017366834</b> | -3,168016434 |
| Casp6          | <b>0,017367876</b> | -1,036276499 |
| Dusp3          | <b>0,017394495</b> | 2,075457255  |
| Golm1          | <b>0,017458333</b> | -0,919048309 |
| Fam83h         | <b>0,017474654</b> | 3,195088069  |
| Ces2b          | <b>0,017555556</b> | -4,947239558 |
| Cyp4f13        | <b>0,017637209</b> | -3,455207825 |
| Slc9a2         | <b>0,017652893</b> | -1,572326024 |
| Aaas           | <b>0,017719626</b> | -2,597078959 |
| H2-Ab1         | <b>0,017726141</b> | -1,406604767 |
| Xylb           | <b>0,0178</b>      | -1,732720057 |
| Aoc1           | <b>0,017874477</b> | -1,265060425 |
| Sprr2a;Sprr2a3 | <b>0,01794958</b>  | 4,741847992  |
| Casp1          | <b>0,018025316</b> | -1,080952962 |
| Itfg3          | <b>0,018101695</b> | -1,344264348 |
| Lgals6         | <b>0,018178723</b> | -6,191833496 |
| Cyp4f40        | <b>0,018200873</b> | -1,851554871 |
| Nfu1           | <b>0,01825641</b>  | 2,985860825  |
| Bcl2l14        | <b>0,018334764</b> | -0,84502538  |
| Fkbp15         | <b>0,018413793</b> | -1,312388102 |
| Pdzk1          | <b>0,018493506</b> | -2,791954676 |
| Mrpl20         | <b>0,01857377</b>  | -1,407372157 |
| Tep1           | <b>0,018573913</b> | -1,190870285 |
| Ptp4a2         | <b>0,018650206</b> | -0,891342799 |
| Erlin1         | <b>0,01883004</b>  | -2,337661107 |
| Hint2          | <b>0,018894309</b> | 1,480604808  |
| Vwf            | <b>0,018904762</b> | -1,136359533 |
| Las1l          | <b>0,018971429</b> | -2,553238551 |
| As3mt          | <b>0,01898008</b>  | -1,024184545 |
| Slc30a10       | <b>0,019056</b>    | -1,246907552 |
| Irak4          | <b>0,019067669</b> | -1,310754776 |
| Nelfb          | <b>0,01913253</b>  | -1,061116536 |
| Cirbp          | <b>0,019139623</b> | 2,795636495  |
| Gsta4          | <b>0,019209677</b> | -2,334692637 |
| Pds5b          | <b>0,019212121</b> | -0,615970612 |
| Gpd1           | <b>0,019285171</b> | -1,309500376 |
| Aif1           | <b>0,019287449</b> | -1,051569621 |
| Rpl24          | <b>0,019328125</b> | 1,247048696  |
| Vipr1          | <b>0,019358779</b> | -2,454165141 |

Table S2.

|                              |                    |              |
|------------------------------|--------------------|--------------|
| Prdx6                        | <b>0,019403922</b> | -0,653203328 |
| Nr3c1                        | <b>0,01943295</b>  | -1,128904978 |
| Zfyve1                       | <b>0,019480315</b> | -1,470607758 |
| Kiaa1467                     | <b>0,019507692</b> | -1,794165929 |
| Tecr                         | <b>0,019583012</b> | 0,534184774  |
| Arhgap26                     | <b>0,01962963</b>  | -1,252799352 |
| Rpl27a                       | <b>0,019658915</b> | 1,28395017   |
| Sh2d7                        | <b>0,019702602</b> | 4,05430603   |
| Cs;Csl                       | <b>0,019735409</b> | 0,905344645  |
| Sh3bp1                       | <b>0,019776119</b> | -1,117568334 |
| Sdc1                         | <b>0,019850187</b> | -1,176562627 |
| Fdft1                        | <b>0,019896679</b> | 2,245715459  |
| L3mbtl1                      | <b>0,021</b>       | -2,91109848  |
| Pdlim2                       | <b>0,021421245</b> | -1,835542043 |
| Rab1A                        | <b>0,021503546</b> | 2,857599894  |
| Coq6                         | <b>0,021580071</b> | -0,554960251 |
| Itga9                        | <b>0,021605178</b> | -1,991235733 |
| Wdr44                        | <b>0,021657143</b> | 1,312557856  |
| Gm28046;Rdh1;Rdh19           | <b>0,021672727</b> | -2,405990601 |
| Ncapg                        | <b>0,021675325</b> | -0,93806076  |
| Ubl3                         | <b>0,021734767</b> | -1,244356791 |
| Map3k2                       | <b>0,021745928</b> | -1,901062012 |
| Hadh                         | <b>0,021751825</b> | -0,979709625 |
| Stag2                        | <b>0,0218</b>      | -0,786968231 |
| Akp3                         | <b>0,02181295</b>  | -1,83868281  |
| Pld1                         | <b>0,021816993</b> | -0,937466304 |
| Swap70                       | <b>0,02182716</b>  | -0,883930206 |
| Micu2                        | <b>0,021830986</b> | -1,033436457 |
| Crot                         | <b>0,02187291</b>  | -1,141318003 |
| Enpp4                        | <b>0,021888525</b> | 4,744160334  |
| Cpq                          | <b>0,021891697</b> | -1,242900848 |
| Rpl29;Gm17669;Gm10709;Gm3550 | <b>0,021894737</b> | 1,601357142  |
| Msrb3                        | <b>0,021908127</b> | 1,488018036  |
| Me1                          | <b>0,021946309</b> | 1,403251648  |
| Adap1                        | <b>0,021960526</b> | -0,981724421 |
| Dpm3                         | <b>0,021962733</b> | 3,85180219   |
| H2-Aa                        | <b>0,021971014</b> | -1,777825038 |
| Snx4                         | <b>0,022006116</b> | -1,09903717  |
| Chgb                         | <b>0,022020202</b> | -1,652362823 |
| Pcsk5                        | <b>0,022031153</b> | -2,311508814 |
| Ear6                         | <b>0,022033003</b> | 1,575095495  |
| Tap2                         | <b>0,022041958</b> | -0,957591375 |
| Htatip2                      | <b>0,022057143</b> | -1,190601349 |
| Tmem258                      | <b>0,02207362</b>  | 2,564788183  |
| Arhgap17                     | <b>0,022094595</b> | -1,078070323 |
| Cog5                         | <b>0,0221</b>      | -0,439172109 |
| Tomm70a                      | <b>0,02210596</b>  | -0,81281662  |
| Usp10                        | <b>0,022119298</b> | -1,061969121 |
| Kiaa0196                     | <b>0,022127389</b> | -1,033221563 |
| Fip1l1                       | <b>0,022129032</b> | 4,507869085  |
| Ankh                         | <b>0,022141538</b> | -3,387449265 |
| Sympk                        | <b>0,022169279</b> | -1,016576767 |

Table S2.

|                           |                    |              |
|---------------------------|--------------------|--------------|
| Ear2                      | <b>0,022169492</b> | 4,288029353  |
| Kctd12                    | <b>0,022179402</b> | 1,897732417  |
| Aadac                     | <b>0,022198083</b> | -1,696587245 |
| Ewsr1                     | <b>0,022238994</b> | 0,967274348  |
| Tmsb10                    | <b>0,022244898</b> | 2,752635956  |
| Pbld2                     | <b>0,022269231</b> | -1,389726639 |
| Ppid                      | <b>0,022309148</b> | -0,810413361 |
| Ldhb                      | <b>0,022317073</b> | 1,190830866  |
| Vps53                     | <b>0,022320819</b> | -1,693659465 |
| Sfn                       | <b>0,022340836</b> | -0,793066661 |
| St3gal4                   | <b>0,022355401</b> | -0,930872599 |
| Larp4b                    | <b>0,022379747</b> | 3,507967631  |
| Txnrd2                    | <b>0,02239726</b>  | -1,246374766 |
| Otc                       | <b>0,022474227</b> | -1,112293879 |
| Mia3                      | <b>0,022551724</b> | -1,246325175 |
| Treh                      | <b>0,022629758</b> | -1,9245224   |
| Ablim1                    | <b>0,022662614</b> | 2,135648092  |
| Apoc2                     | <b>0,022708333</b> | -1,906639099 |
| Nup210                    | <b>0,023975758</b> | -0,738474528 |
| Snf8                      | <b>0,024036036</b> | -0,898511251 |
| Gm14409                   | <b>0,024108434</b> | -1,578564326 |
| Ptgis                     | <b>0,024181269</b> | 5,148537318  |
| Adipoq                    | <b>0,024935065</b> | -0,916569392 |
| Eea1                      | <b>0,024973913</b> | -0,623357773 |
| Rnf114                    | <b>0,025</b>       | 0,794337591  |
| Gstm6                     | <b>0,025002985</b> | -3,829331716 |
| Snx2                      | <b>0,025046512</b> | -0,758053462 |
| Cuta                      | <b>0,025065274</b> | -0,882174174 |
| Atp7a                     | <b>0,025077844</b> | -1,092701594 |
| Ccdc124                   | <b>0,025095101</b> | 1,188521703  |
| Gm6086;Gm9994;Gal3st2     | <b>0,025119534</b> | -4,114041011 |
| Cst3                      | <b>0,02513089</b>  | 3,375139872  |
| Tm4sf5                    | <b>0,025147929</b> | -1,671864192 |
| Rab13                     | <b>0,02516763</b>  | -0,813690821 |
| Cggbp1                    | <b>0,025170213</b> | 1,451763153  |
| Ankmy2                    | <b>0,025173184</b> | -1,12467893  |
| Bzw2                      | <b>0,025192982</b> | -0,895811081 |
| Usp9x                     | <b>0,02519685</b>  | 2,811337789  |
| Tns3                      | <b>0,025210811</b> | 0,934647878  |
| Fen1                      | <b>0,025222552</b> | -0,603568395 |
| Tmsb15l;Tmsb15b1;Tmsb15b2 | <b>0,025237333</b> | -1,282214483 |
| Gusb                      | <b>0,025243697</b> | -1,133391062 |
| 2010107G23Rik             | <b>0,025263158</b> | -1,507961273 |
| Tom1l2                    | <b>0,025266862</b> | 3,037590027  |
| Elmo1                     | <b>0,025269122</b> | -0,687072754 |
| Slc44a4                   | <b>0,025279133</b> | -1,350074768 |
| Cct6b                     | <b>0,025297619</b> | -0,923368454 |
| Ddhd2                     | <b>0,025304813</b> | -1,515966415 |
| Syne2                     | <b>0,02530659</b>  | -0,939463298 |
| Slc33a1                   | <b>0,025307479</b> | -0,902560552 |
| Hspb1                     | <b>0,025314607</b> | 1,95467631   |
| Galnt4                    | <b>0,025329815</b> | -0,668472926 |

Table S2.

|          |                    |              |
|----------|--------------------|--------------|
| U2af1    | <b>0,025340659</b> | 1,287786484  |
| Nub1     | <b>0,025340909</b> | -0,793923696 |
| Wdr5     | <b>0,025341176</b> | -0,873895009 |
| Stat6    | <b>0,025347826</b> | -1,068949382 |
| Pafah1b3 | <b>0,025372654</b> | -0,946840922 |
| Itih4    | <b>0,025377778</b> | -0,956794103 |
| Lig1     | <b>0,02537931</b>  | -1,04782486  |
| Rprd1b   | <b>0,025385915</b> | -0,739318212 |
| Ly75     | <b>0,025396825</b> | -1,303162893 |
| Clock    | <b>0,025410468</b> | -1,066561381 |
| Larp7    | <b>0,025413105</b> | -0,966107686 |
| Tmem120a | <b>0,025415929</b> | -1,27632459  |
| Chchd5   | <b>0,025416894</b> | -2,889750799 |
| Pdpr     | <b>0,02544086</b>  | -2,029337565 |
| Myof     | <b>0,025448468</b> | 0,618940353  |
| Pnn      | <b>0,025457627</b> | -0,602099737 |
| Rpl3l    | <b>0,02546114</b>  | 1,453545888  |
| Acat1    | <b>0,025464191</b> | 0,888262431  |
| Rab4a    | <b>0,025480663</b> | -0,955922445 |
| Pstpip2  | <b>0,025485714</b> | -0,821707408 |
| Cyp2d26  | <b>0,025486339</b> | -1,624536514 |
| Ppm1g    | <b>0,025509434</b> | -0,532764435 |
| Kpna4    | <b>0,025556164</b> | -0,830005646 |
| Htt      | <b>0,025649485</b> | -0,836494446 |
| Ppa1     | <b>0,025715762</b> | -0,907272339 |
| Tbcd     | <b>0,025902314</b> | -0,759945552 |
| Clic5    | <b>0,02605102</b>  | -1,336146673 |
| Dram2    | <b>0,026117647</b> | 2,036824544  |
| Fuca1    | <b>0,026184615</b> | -1,290784836 |
| Arpc5l   | <b>0,02626972</b>  | -1,118665695 |
| Rpl14    | <b>0,02648731</b>  | 1,531932195  |
| Hsd17b11 | <b>0,026756892</b> | -1,119944255 |
| Sptb     | <b>0,026762376</b> | -2,831659953 |
| Tmem126b | <b>0,026824121</b> | -1,579915365 |
| Agrn     | <b>0,026828784</b> | -0,694877625 |
| Nt5e     | <b>0,026891688</b> | -0,777801514 |
| Nvl      | <b>0,026895522</b> | 1,025319417  |
| Fry      | <b>0,026959596</b> | -0,9130675   |
| Aldh18a1 | <b>0,026962594</b> | -0,975054423 |
| Hspb6    | <b>0,026992665</b> | 4,935557683  |
| Actg1    | <b>0,027027848</b> | 5,218947093  |
| Krtcap2  | <b>0,02703</b>     | 2,742132187  |
| Rnaset2  | <b>0,027058824</b> | -1,298467    |
| Pepd     | <b>0,027125307</b> | -1,237759272 |
| Sec14l2  | <b>0,02715122</b>  | -1,192654292 |
| Mcm5     | <b>0,027192118</b> | -0,868244807 |
| H2-T23   | <b>0,027259259</b> | -2,324245453 |
| Inpp5b   | <b>0,027271845</b> | -0,759786606 |
| Gstm4    | <b>0,0273382</b>   | -1,368157705 |
| Srrm1    | <b>0,027864407</b> | -1,024168015 |
| Slc35a3  | <b>0,028</b>       | 1,55444018   |
| Lyz2     | <b>0,028064665</b> | 3,661554337  |

Table S2.

|               |                    |              |
|---------------|--------------------|--------------|
| Nanp          | <b>0,028073394</b> | -1,717502594 |
| Mrps23        | <b>0,02812963</b>  | -0,817617416 |
| Hsph1         | <b>0,028137931</b> | -0,703200022 |
| Gm10094;Sap18 | <b>0,028194896</b> | 1,316384633  |
| Ces1e         | <b>0,028260465</b> | -1,657039642 |
| Sis           | <b>0,028320366</b> | -1,518795013 |
| Idh3a         | <b>0,02832634</b>  | 0,660054525  |
| Calm1;Calml3  | <b>0,028348235</b> | -0,913917542 |
| Trim16        | <b>0,028392523</b> | -1,250802994 |
| Ccdc90b       | <b>0,028415094</b> | -1,176068624 |
| Wdr91         | <b>0,028433735</b> | 1,878442128  |
| Apoa2         | <b>0,028436364</b> | -0,973324458 |
| Esyt1         | <b>0,028459016</b> | 0,772343953  |
| Eln           | <b>0,02848227</b>  | -0,898040136 |
| Slc30a5       | <b>0,028501139</b> | -0,898660024 |
| Abcb1a;Abcb1b | <b>0,028502415</b> | -1,41579628  |
| Kiaa0020      | <b>0,028523702</b> | -1,473737081 |
| Dak           | <b>0,028525822</b> | -0,971940358 |
| Mthfd1l       | <b>0,028526316</b> | -0,921475093 |
| Tdrd7         | <b>0,028549763</b> | -1,261979421 |
| Tab1          | <b>0,02856621</b>  | -1,218947728 |
| Ptprf         | <b>0,028588235</b> | -2,240425746 |
| Mki67         | <b>0,028594724</b> | 3,788967768  |
| Bche          | <b>0,028617577</b> | -2,413056691 |
| Btaf1         | <b>0,028653061</b> | -0,90567716  |
| Cyp51a1       | <b>0,028663462</b> | 2,664209366  |
| Rbm3          | <b>0,028685714</b> | 6,086173375  |
| Rhpn2         | <b>0,028711712</b> | -0,982477824 |
| Coa3          | <b>0,028732143</b> | 1,805744807  |
| Psmg3         | <b>0,028754177</b> | -3,377598445 |
| Znf768        | <b>0,028796421</b> | 1,412010829  |
| Caprin1       | <b>0,028860987</b> | -0,490481695 |
| Pls1          | <b>0,028925843</b> | -1,017208099 |
| Tm4sf20       | <b>0,0296</b>      | -1,765931447 |
| H2-T3         | <b>0,029665924</b> | -2,215529124 |
| Ppp1r1b       | <b>0,029791574</b> | 1,754562378  |
| Srsf2         | <b>0,030740088</b> | 0,808054606  |
| Commd6        | <b>0,030807947</b> | 1,78756841   |
| Trpm4         | <b>0,030876106</b> | -1,451647441 |
| Msmo1         | <b>0,030945055</b> | 2,313344955  |
| Plekho2       | <b>0,031299781</b> | -0,782022476 |
| Cth           | <b>0,031368421</b> | -1,280345917 |
| Rnf123        | <b>0,031389978</b> | 1,956497192  |
| Nlrc4         | <b>0,031446541</b> | -1,6463871   |
| Stmn1         | <b>0,031458515</b> | -0,906469345 |
| Timm9         | <b>0,0315</b>      | -1,006853104 |
| Pfdn2         | <b>0,031512605</b> | -0,633898417 |
| Palld         | <b>0,031516949</b> | 2,618036906  |
| Arhgap27      | <b>0,031547826</b> | -1,248179754 |
| Snx7          | <b>0,031568035</b> | -1,134731293 |
| Clpb          | <b>0,031578947</b> | -0,602220535 |
| Ndufb4        | <b>0,031583864</b> | 1,237918218  |



Table S2.

|          |                    |              |
|----------|--------------------|--------------|
| Pdhb     | <b>0,031636364</b> | 1,092151006  |
| Ahcyl2   | <b>0,03164557</b>  | -0,57027626  |
| Arhgdib  | <b>0,031651064</b> | 1,461378098  |
| Slc16a1  | <b>0,031656652</b> | 0,789677302  |
| Gbp1     | <b>0,031704989</b> | 2,170850754  |
| Lpp      | <b>0,031712474</b> | 1,40132014   |
| Rps6ka1  | <b>0,03171855</b>  | -0,539976756 |
| Hmgcl    | <b>0,031724731</b> | -0,790173848 |
| Aldh1a1  | <b>0,031786325</b> | -1,405832926 |
| Msh2     | <b>0,031832636</b> | -0,73976771  |
| Clrn3    | <b>0,03185439</b>  | 0,745613734  |
| Bzw1     | <b>0,032267223</b> | -0,72905604  |
| Lpcat3   | <b>0,032390852</b> | -1,075717926 |
| Sarnp    | <b>0,032458333</b> | -0,438947042 |
| Dus3l    | <b>0,032514286</b> | 1,84869194   |
| Rpe      | <b>0,032539419</b> | -0,764565786 |
| Echs1    | <b>0,032557769</b> | 0,979631424  |
| Cluh     | <b>0,032560976</b> | -0,625062307 |
| Atg16l1  | <b>0,032580777</b> | -0,883625031 |
| Zfand2b  | <b>0,032622754</b> | 1,997732798  |
| Rgs10    | <b>0,032627291</b> | -0,807399114 |
| Krt13    | <b>0,032647541</b> | -2,457819621 |
| Fhl2     | <b>0,032688</b>    | 3,294181188  |
| Ap4s1    | <b>0,032714579</b> | -1,150419235 |
| Clic6    | <b>0,032753507</b> | -0,946733475 |
| Rpl21    | <b>0,032763419</b> | 1,340487798  |
| Smdt1    | <b>0,032781893</b> | 2,624276479  |
| Ybx3     | <b>0,032819277</b> | 1,580254237  |
| Atp5j    | <b>0,032849485</b> | -0,918667475 |
| Pkp1     | <b>0,032874494</b> | -1,264663061 |
| Col12a1  | <b>0,032880952</b> | -0,679506938 |
| H2afx    | <b>0,032885312</b> | 1,595064163  |
| Nbeal1   | <b>0,032917355</b> | -1,722054164 |
| Srsf9    | <b>0,032941176</b> | 1,152037938  |
| Strbp    | <b>0,032951613</b> | -0,978863398 |
| Cfi      | <b>0,032985507</b> | -0,853706996 |
| Arhgap18 | <b>0,033018182</b> | -0,816678365 |
| Pus1     | <b>0,033449505</b> | -0,708231608 |
| Man2b1   | <b>0,033897233</b> | -0,776280085 |
| Sult1b1  | <b>0,034074951</b> | -1,015797933 |
| Lipe     | <b>0,034251969</b> | -1,611990611 |
| Ceacam1  | <b>0,034658869</b> | -0,924058914 |
| Mapk9    | <b>0,034682353</b> | -0,929154078 |
| Calml4   | <b>0,034726563</b> | -1,019316355 |
| Cap2     | <b>0,034750491</b> | 0,798754374  |
| Rpl31    | <b>0,034794521</b> | 1,859345118  |
| Txnrd1   | <b>0,034930769</b> | -1,037974675 |
| Eif1ad   | <b>0,034937984</b> | 1,546024323  |
| Suclg1   | <b>0,034998073</b> | 0,865495682  |
| Slc25a12 | <b>0,035005825</b> | 0,625774384  |
| Mtch1    | <b>0,035065637</b> | 0,820450465  |
| Dhrs11   | <b>0,03507393</b>  | -1,187800725 |

Table S2.

|             |                    |              |
|-------------|--------------------|--------------|
| Alpi        | <b>0,035133462</b> | -1,281256358 |
| Stard4      | <b>0,035586207</b> | 1,176367442  |
| Apoa4       | <b>0,035654511</b> | -1,053254445 |
| Ifi47       | <b>0,035690566</b> | -0,998904546 |
| Cyp2c66     | <b>0,035758034</b> | -1,856433868 |
| Ntmt1       | <b>0,035783178</b> | -2,27613767  |
| Csnk2b      | <b>0,035825758</b> | 1,164508184  |
| Ppcs        | <b>0,035850187</b> | -0,779385885 |
| Nup133      | <b>0,035879473</b> | 3,285128276  |
| Col4a3bp    | <b>0,035880597</b> | -1,147264481 |
| Snx1        | <b>0,035885496</b> | -0,605102539 |
| Pmm1        | <b>0,035893738</b> | 2,805149078  |
| Hectd1      | <b>0,035917448</b> | 0,810800552  |
| F13a1       | <b>0,03593321</b>  | 4,59022522   |
| Fuca2       | <b>0,035954111</b> | -0,87741979  |
| Rdh7        | <b>0,035961977</b> | -1,943016052 |
| Hook1       | <b>0,035984962</b> | -0,439746857 |
| Lgals2      | <b>0,036</b>       | -0,88218689  |
| Cdcp1       | <b>0,03601444</b>  | -1,27272288  |
| Tmco1       | <b>0,036030476</b> | 1,306588491  |
| Rps9        | <b>0,036067039</b> | 1,459582647  |
| Rpl18       | <b>0,036079566</b> | 1,968537649  |
| Psm8        | <b>0,036107914</b> | -0,393330892 |
| Mrps35      | <b>0,036144928</b> | -0,705278397 |
| Phb         | <b>0,036172973</b> | 1,032182693  |
| Rab24       | <b>0,036200717</b> | 1,552565893  |
| Ttr         | <b>0,036210526</b> | -1,317406336 |
| Fam91a1     | <b>0,036251852</b> | -0,748435338 |
| Fn1         | <b>0,036265709</b> | 1,57855161   |
| Hccs        | <b>0,036276364</b> | -1,085205714 |
| Ugt2a3      | <b>0,036342441</b> | -1,635721207 |
| Tpr         | <b>0,036408759</b> | -0,409330368 |
| Tubb6       | <b>0,03647532</b>  | 1,76622963   |
| Commd7      | <b>0,036493554</b> | -2,959668477 |
| Ahcyl1      | <b>0,036522361</b> | -1,136145274 |
| Rpl26       | <b>0,036542125</b> | 0,838667552  |
| Stk3        | <b>0,036560886</b> | -1,355829239 |
| Ifit1       | <b>0,036609174</b> | -1,179703395 |
| Cast        | <b>0,036614286</b> | 1,734460831  |
| Nmnat3      | <b>0,036628466</b> | -3,054054896 |
| Crk         | <b>0,036676471</b> | 1,487795512  |
| Samhd1      | <b>0,036862191</b> | -0,644424438 |
| Dpp4        | <b>0,036927434</b> | -1,218521754 |
| Enpep       | <b>0,036992908</b> | -1,05840683  |
| Dsp         | <b>0,037058615</b> | -0,451749166 |
| Lamtor1     | <b>0,037124555</b> | 0,535449346  |
| Krt18       | <b>0,037178131</b> | 0,685305278  |
| Akr1b8      | <b>0,037190731</b> | -1,115992864 |
| Rock2       | <b>0,037209139</b> | -0,640602748 |
| Dera        | <b>0,037274648</b> | -0,515831629 |
| Rpl6;Gm5428 | <b>0,037405772</b> | 1,634690603  |
| Epb41l3     | <b>0,037469388</b> | 0,887992223  |

Table S2.

|                    |                    |              |
|--------------------|--------------------|--------------|
| Eepd1              | <b>0,03753322</b>  | -2,080243429 |
| Nif3l1             | <b>0,03759727</b>  | -0,691724141 |
| Tsc22d1            | <b>0,037661538</b> | -1,506918589 |
| Cisd1              | <b>0,037693333</b> | 1,255963643  |
| Supt16;Supt16h     | <b>0,037698816</b> | -0,516705195 |
| Commd8             | <b>0,037726027</b> | -0,531784058 |
| Gprc5a             | <b>0,037731343</b> | 1,86158371   |
| Gclc               | <b>0,03775626</b>  | -1,005069097 |
| Mrps15             | <b>0,037762712</b> | -0,998849869 |
| Sumo1              | <b>0,037790738</b> | -0,706454595 |
| Nhp2l1             | <b>0,03779402</b>  | 1,392817179  |
| Dis3l2             | <b>0,037819398</b> | -0,901740392 |
| Ptk7               | <b>0,037844595</b> | -1,664564133 |
| Mrrf               | <b>0,03785567</b>  | -0,670604706 |
| Vdac1              | <b>0,037856905</b> | 1,021642685  |
| Pip4k2a            | <b>0,037874172</b> | 1,527876536  |
| Cct5               | <b>0,037882747</b> | -0,390085856 |
| Nostrin            | <b>0,037920826</b> | -0,928986867 |
| Ces2a              | <b>0,03794087</b>  | -1,654364904 |
| Triap1             | <b>0,037946309</b> | -1,08973376  |
| B4galnt2           | <b>0,037986207</b> | -1,018287023 |
| Hsd17b6            | <b>0,038006969</b> | -3,116512299 |
| Ace                | <b>0,038010084</b> | -1,650245667 |
| Oxct1              | <b>0,038016529</b> | 0,931944529  |
| Myo1f              | <b>0,038051813</b> | 1,967356364  |
| Gng5               | <b>0,038073298</b> | -1,069854101 |
| Rpl13              | <b>0,038074074</b> | 1,37818718   |
| Ctsh               | <b>0,038117647</b> | -0,89840126  |
| Mettl7b            | <b>0,03813828</b>  | -1,469804764 |
| Rps2;Gm5786;Gm8225 | <b>0,03813986</b>  | 0,851568858  |
| Mapk10;Mapk8       | <b>0,038158416</b> | -1,431585312 |
| Wipf1              | <b>0,038183709</b> | 1,842782338  |
| Rpl27              | <b>0,038206655</b> | 2,148014704  |
| Usmg5              | <b>0,03825</b>     | 2,292674383  |
| Smc1a              | <b>0,038273684</b> | -0,479103088 |
| Stat1              | <b>0,038728171</b> | -0,82054774  |
| Pdha1              | <b>0,038784893</b> | 1,247526805  |
| Dynll2             | <b>0,038848684</b> | 1,458118439  |
| Atp5i              | <b>0,038915584</b> | 2,368718465  |
| Myo9b              | <b>0,038932039</b> | -0,966662089 |
| Nup107             | <b>0,038944262</b> | -0,774672826 |
| Anxa1              | <b>0,038978862</b> | 0,737284342  |
| Tm4sf4             | <b>0,038995138</b> | -1,550079981 |
| Dnajb12            | <b>0,039019608</b> | -0,861607234 |
| Smarcc2            | <b>0,039042345</b> | -0,576186498 |
|                    | <b>0,039069467</b> | 0,717487335  |
| Pvr                | <b>0,03908347</b>  | -1,239006678 |
| Dnaaf5             | <b>0,039106036</b> | -0,734517415 |
| Muc13              | <b>0,039466238</b> | -0,96462059  |
| Guk1               | <b>0,039529791</b> | -0,501396815 |
| Dpy30              | <b>0,039593548</b> | -0,797250748 |
| Nudt5              | <b>0,039820225</b> | -1,046974182 |

Sep-02

Table S2.

|                      |                    |              |
|----------------------|--------------------|--------------|
| Vars2                | <b>0,0403776</b>   | -0,691696803 |
| Anxa11               | <b>0,040442308</b> | -0,652862549 |
| Psmc1                | <b>0,040498403</b> | -0,517396927 |
| Rpl36a               | <b>0,04066563</b>  | 1,749471029  |
| Cct6a                | <b>0,040728972</b> | -0,487961451 |
| Nelfcd               | <b>0,040746411</b> | -0,931589127 |
| Gm9825;Rnps1         | <b>0,040778481</b> | 1,232631683  |
| Npl                  | <b>0,040792512</b> | 0,806037903  |
| Luc7l                | <b>0,040833068</b> | 0,716957092  |
| Mfsd6                | <b>0,040843106</b> | 1,254755656  |
| Apoa1                | <b>0,04085625</b>  | -1,048468272 |
| Casp7                | <b>0,040898089</b> | -0,694763819 |
| Pnp                  | <b>0,040907937</b> | -0,803513209 |
| Rpl32                | <b>0,040920188</b> | 0,885107676  |
| Bub3                 | <b>0,040925466</b> | 1,38645045   |
| Erap1                | <b>0,040984326</b> | -0,883227666 |
| Lancl1               | <b>0,041048666</b> | 1,174866994  |
| Mrpl48               | <b>0,041072868</b> | -0,697295507 |
| Rtn4                 | <b>0,041093207</b> | 0,696809769  |
| Tuba1c               | <b>0,041113208</b> | 2,878885905  |
| Sh3gl2               | <b>0,041177953</b> | -0,75110817  |
| Adh1                 | <b>0,041242902</b> | -1,150129954 |
| H2-K1                | <b>0,041498452</b> | -0,539868673 |
| Golga4               | <b>0,04208642</b>  | -0,735253016 |
| Ptk2                 | <b>0,042151468</b> | -0,681201299 |
| Smarcd2              | <b>0,042664615</b> | -0,655321757 |
| Hmgn2;Gm6594;Gm16494 | <b>0,042730354</b> | 4,267596563  |
| Ublcp1               | <b>0,043354839</b> | -0,755832036 |
| Rell1                | <b>0,043540582</b> | -0,738373439 |
| Gbp2b                | <b>0,043607362</b> | -1,197898865 |
| Phospho1             | <b>0,043615267</b> | -2,279228846 |
| Cul5                 | <b>0,043681957</b> | -0,640961329 |
| Sgpl1                | <b>0,043689024</b> | -0,982479095 |
| Lrmp                 | <b>0,043726444</b> | 2,872276306  |
| Ccdc51               | <b>0,043792998</b> | -1,082413991 |
| Dpysl3               | <b>0,043975721</b> | 0,651519775  |
| Psmc6                | <b>0,044536953</b> | -0,439629873 |
| Parp14               | <b>0,044538578</b> | -0,670635223 |
| Gnb2                 | <b>0,04460423</b>  | 2,499809901  |
| Spg21                | <b>0,044606061</b> | -1,924441655 |
| Smtn                 | <b>0,044813253</b> | 0,887659709  |
| Adh5                 | <b>0,044884211</b> | -0,426019669 |
| Rpl36                | <b>0,044940476</b> | 1,105434418  |
| 1700019G17Rik        | <b>0,045007452</b> | -1,620560964 |
| Slc25a10             | <b>0,045021021</b> | -0,999839147 |
| Ndufs5               | <b>0,045074627</b> | 1,115752538  |
| Chmp3                | <b>0,045091454</b> | -0,565975825 |
| Prpf19               | <b>0,045139466</b> | -0,499071757 |
| Pipox                | <b>0,045142003</b> | -1,303236008 |
| Rsrp1                | <b>0,045206538</b> | 2,498725255  |
| Endod1               | <b>0,045209581</b> | 1,964183807  |
| Prdx5                | <b>0,045226667</b> | 0,558417002  |

Table S2.

|                       |                    |              |
|-----------------------|--------------------|--------------|
| Col6a4                | <b>0,045295858</b> | -0,784571966 |
| Nucks1                | <b>0,045563422</b> | 2,104935964  |
| Abcd1                 | <b>0,045630724</b> | -0,883203506 |
| Atp5d                 | <b>0,045964706</b> | 1,560153961  |
| Sec61b;Gm10320        | <b>0,046032401</b> | 1,578626633  |
| Pfdn6                 | <b>0,046040936</b> | -0,587399801 |
| Acad9                 | <b>0,046087464</b> | -0,554172516 |
| Arid1a                | <b>0,046108346</b> | -0,794276555 |
| Pds5a                 | <b>0,046154745</b> | -0,414993922 |
| Cideb                 | <b>0,046171761</b> | -1,262236913 |
| Exoc3l4               | <b>0,046175953</b> | -1,162048976 |
| Vdac3                 | <b>0,046238372</b> | 1,199310303  |
| Nqo2                  | <b>0,046243759</b> | -1,237989426 |
| Trim12c;Trim5;Trim12a | <b>0,046548621</b> | -0,742394129 |
| Lrrc16a               | <b>0,046857971</b> | -0,926128387 |
| Apoc3                 | <b>0,046969609</b> | -3,977083206 |
| Fnbp1l                | <b>0,047031519</b> | -0,719475428 |
| Myo1a                 | <b>0,047080925</b> | -0,746494293 |
| Lmod1                 | <b>0,047098996</b> | 0,657659531  |
| Ppip5k2               | <b>0,047113019</b> | -0,754199346 |
| Dnajc19               | <b>0,047166667</b> | -0,562796911 |
| Pum1                  | <b>0,047234532</b> | -0,826681773 |
| Mgst1                 | <b>0,047302594</b> | -1,398954391 |
| Ear3                  | <b>0,047370851</b> | 6,334740321  |
| Mrpl4                 | <b>0,047651429</b> | -0,620420456 |
| Rras2                 | <b>0,047834993</b> | 0,710918427  |
| Pdcd4                 | <b>0,047903134</b> | -0,899449031 |
| Eef2                  | <b>0,047943343</b> | 0,680960337  |
| Ndfip2                | <b>0,047971469</b> | -1,071377436 |
| ldh1                  | <b>0,048011348</b> | -0,815279643 |
| Ppp2r1b               | <b>0,048079545</b> | -1,313825607 |
| Eif2ak2               | <b>0,048209335</b> | -0,967852275 |
| Lmf1                  | <b>0,048231312</b> | 1,376603444  |
| Trap1                 | <b>0,048299435</b> | -0,454300563 |
| Ecm29;Al314180        | <b>0,048309859</b> | -0,47129631  |
| Atp6v0a2              | <b>0,048405063</b> | -0,619696935 |
| Aco2                  | <b>0,048640449</b> | 0,72379303   |
| Apoc1                 | <b>0,048762973</b> | -1,231443405 |
| Timm13                | <b>0,048885154</b> | -0,794553121 |
| Lamp1                 | <b>0,049006993</b> | -0,786970774 |
| Ddx58                 | <b>0,04947486</b>  | -0,579592387 |
| Postn                 | <b>0,04962117</b>  | 0,450763702  |
| Pbxip1                | <b>0,049690377</b> | 1,40253067   |
| Tnpo1                 | <b>0,049713491</b> | -0,571358999 |
| Arfgap3               | <b>0,04999455</b>  | 0,850307465  |
| Aga                   | 0,050062756        | -1,271138509 |
| Fnbp1                 | 0,050131148        | -0,677406947 |
| Vapb                  | 0,050194787        | 1,650157293  |
| Gucy2c                | 0,050199726        | -1,709810257 |
| Fcgrt                 | 0,050258953        | -0,733259201 |
| Tuba4a                | 0,050263736        | 0,975549698  |
| Ppp1r14a              | 0,050268493        | 2,832772573  |

Table S2.

|                     |             |              |
|---------------------|-------------|--------------|
| Pex19               | 0,050328276 | -0,44808197  |
| Mp68                | 0,050332875 | 1,597424825  |
| Rnasel              | 0,05039779  | -1,009862264 |
| Bag1                | 0,050467497 | -0,839878718 |
| Rp2                 | 0,050537396 | -0,555203756 |
| Pdcd6               | 0,05060749  | -0,876881917 |
| Hsd17b4             | 0,050677778 | -0,905937831 |
| Rab3d               | 0,050695652 | 1,999736786  |
| Pafah1b1            | 0,050764626 | -0,526280085 |
| Sbds                | 0,051307172 | -0,614035924 |
| Stx3                | 0,051327001 | -1,121767044 |
| Enoph1              | 0,051336032 | -0,73050944  |
| Fam45a              | 0,051376694 | -0,998638789 |
| Slc25a15            | 0,051380888 | -1,176104863 |
| Dazap1              | 0,051405405 | 0,889090856  |
| Rpl7                | 0,051450135 | 1,221317927  |
| Flrt3               | 0,051591398 | 1,028064728  |
| Upf2                | 0,051672483 | -0,909229914 |
| Dap3                | 0,051804749 | -0,73461024  |
| Serpinc1            | 0,051873184 | -0,531175613 |
| Heatr5a             | 0,051899868 | -0,794790904 |
| Defcr20;Defa20      | 0,051941799 | -1,664696376 |
| Urod                | 0,052010596 | 0,658822378  |
| Lss                 | 0,052069333 | 0,592772166  |
| Parp4               | 0,052079576 | -1,253737768 |
| Srsf1               | 0,052115789 | 1,700413386  |
| Ftl1;Ftl2           | 0,052138852 | -1,263885498 |
| Ly6d                | 0,052148738 | 0,964125951  |
| Cyp4f14             | 0,052193029 | -1,350762685 |
| Cog6                | 0,052208556 | -0,642605464 |
| Wasl                | 0,052218085 | -1,321183523 |
| Exoc2               | 0,052278447 | -1,64553833  |
| Mzb1                | 0,052287617 | 0,97389857   |
| Capzb               | 0,053038008 | 1,913194021  |
| Slc30a7             | 0,053107612 | -0,817147573 |
| Serpind1            | 0,053177398 | -1,371018092 |
| Entpd7              | 0,053375163 | -0,838511149 |
| Fau                 | 0,053413299 | 2,046482722  |
| Palld               | 0,053445026 | 1,336737951  |
| Far2                | 0,053483029 | -2,842480342 |
| Aox2                | 0,05365625  | -3,188500722 |
| Kif21a              | 0,054013004 | -1,155059179 |
| Smim7               | 0,054238961 | -2,983146667 |
| Psmb4               | 0,054259067 | 1,286298116  |
| Xkr9                | 0,054329442 | -2,575997035 |
| Gbp4                | 0,054525226 | -0,896022161 |
| Vps26b              | 0,054573643 | 1,011802673  |
| Naa10;Gm16286;Naa11 | 0,054812903 | 1,751116435  |
| Ube2l6              | 0,055109395 | -1,270746867 |
| Gla                 | 0,055127086 | -0,775003433 |
| Pdap1               | 0,055180412 | 1,092500051  |
| Dpyd                | 0,055192848 | -0,705606461 |

Table S2.

|                   |             |              |
|-------------------|-------------|--------------|
| Clcn3;Clcn5;Clcn4 | 0,055197943 | -2,964677811 |
| Slc9a3r1          | 0,055232529 | -0,779261271 |
| Tra2b             | 0,055263427 | 1,616770426  |
| Col3a1            | 0,055292308 | 1,420875549  |
| AK157302;lsca1    | 0,055302799 | 2,007006327  |
| Rpa1              | 0,055334187 | -0,523347855 |
| Gbp7              | 0,055335025 | -1,007317225 |
| Cab39             | 0,055373248 | -0,68445905  |
| Usp5              | 0,055443878 | -0,342664083 |
| Nhp2              | 0,05599493  | 4,987787247  |
| Abcf3             | 0,056115723 | -0,847537359 |
| Lrg1              | 0,056130489 | -0,984330495 |
| Pak4              | 0,056186398 | -0,711470922 |
| Ces1d             | 0,056201005 | -1,262921651 |
| Gnaq              | 0,056222785 | 1,042146683  |
| F11r              | 0,056257251 | -0,704840978 |
| Asah2             | 0,056268015 | -1,849491119 |
| Cdhr2             | 0,056285714 | -1,222830455 |
| Dffa              | 0,0563      | -0,66626358  |
| Syngn2;Gm20708    | 0,056328283 | -1,621014277 |
| Cnpy2             | 0,056370463 | 1,452477773  |
| Stx4              | 0,056871731 | -0,655162811 |
| Cul1              | 0,056942643 | -0,501063029 |
| Gadd45gip1        | 0,057013733 | -1,099277496 |
| Puf60             | 0,057069652 | -0,586044947 |
| Amacr             | 0,05712795  | -1,072612127 |
| Tial1             | 0,05732852  | 1,054572423  |
| Serpinh1          | 0,057370192 | 0,684633255  |
| Flna              | 0,05739759  | 1,082954407  |
| Myo6              | 0,057440576 | -0,612480164 |
| Pde1c             | 0,057466828 | 1,526550929  |
| Atp2a3            | 0,057478908 | 0,685419083  |
| Slc9a3            | 0,057482014 | 1,023724874  |
| Acsf3             | 0,057490099 | -0,872204463 |
| Timm44            | 0,057536232 | -0,482208888 |
| Myg1              | 0,057561338 | -0,407044729 |
| Reg4              | 0,057605804 | 1,283205668  |
| Rad23a            | 0,057650246 | -0,670967102 |
| Hist1h1d          | 0,057655502 | 1,961102168  |
| Ece1              | 0,057675545 | -2,790506999 |
| Gosr1             | 0,057675676 | -0,616116842 |
| Pfkip             | 0,057721332 | -0,656349182 |
| Map2k1            | 0,057724551 | -0,597300212 |
| Srsf7             | 0,057745455 | 1,372319539  |
| Mtmt9             | 0,057746617 | 0,728550593  |
| Coro2a            | 0,057792593 | -0,712572734 |
| Tgtp1             | 0,057815534 | -0,698940913 |
| Wars              | 0,05786403  | 0,845104853  |
| Shmt1             | 0,057869939 | -0,513204575 |
| Mtdh              | 0,057885784 | 0,81748263   |
| Amfr              | 0,057956204 | -0,677890778 |
| Cul3              | 0,058017136 | -0,402750015 |

Table S2.

|                   |             |              |
|-------------------|-------------|--------------|
| Lyplal1           | 0,058026797 | -1,651902517 |
| Kiaa1598          | 0,058026862 | -0,717305501 |
| B3galtl           | 0,058088235 | -2,853913625 |
| Scamp1            | 0,058097561 | 1,105203629  |
| Derl2             | 0,0580978   | 3,618584951  |
| Gstt1             | 0,058566308 | -0,964882533 |
| Atrx              | 0,058958383 | -0,326032003 |
| Pdzd3             | 0,059028571 | -1,408393224 |
| Gabpa             | 0,059064439 | -0,707305272 |
| Srsf10            | 0,059098927 | 1,891563416  |
| Stk17b            | 0,059103203 | 0,737965266  |
| Cdh1              | 0,059173397 | -0,69462649  |
| Itga7             | 0,05934434  | 0,812956492  |
| Sra1              | 0,059388954 | -0,90558815  |
| Purb              | 0,059396938 | 0,823066076  |
| Lsm6              | 0,059414404 | -0,451944351 |
| Mrpl47            | 0,059458824 | -0,60762469  |
| Plcb3             | 0,059464455 | -0,647431691 |
| Bst2              | 0,059484634 | -1,00206248  |
| Gsdmdc1           | 0,05955503  | -0,543046951 |
| Pgd               | 0,059699883 | -0,51453654  |
| Rpl4              | 0,059769953 | 0,693824768  |
| Gbp2              | 0,059868852 | -0,676945368 |
| Ccz1              | 0,060102924 | 0,393334071  |
| Gm20498           | 0,060294393 | -0,65137736  |
| Golt1b            | 0,060372526 | 4,73724556   |
| Stx8              | 0,06038273  | -1,210159938 |
| Pde4d             | 0,06044289  | -0,813294093 |
| lyd               | 0,060524362 | 3,799734751  |
| Ppp6r2            | 0,060534884 | -3,573204676 |
| Rac2              | 0,060594657 | 0,58452034   |
| Endog             | 0,060605505 | 0,862915675  |
| Hmgb2             | 0,060675086 | -0,495391846 |
| Ces2e             | 0,060681344 | -0,912021637 |
| Smarcc1           | 0,060744828 | -0,859287262 |
| Gigyf2            | 0,060762125 | 1,478230158  |
| Zbtb7a            | 0,060805461 | 1,063374201  |
| Acap2             | 0,060808173 | -0,452611287 |
| Aifm1             | 0,060813714 | 0,752768834  |
| Fhl1              | 0,06081473  | 1,08566157   |
| Svil              | 0,060828829 | 0,554745992  |
| Ormdl3            | 0,06083237  | 3,542927424  |
| Gltf              | 0,060862302 | -0,615351995 |
| Hat1              | 0,060874715 | 1,380783717  |
| Ap3m1             | 0,060877273 | -0,342707316 |
| Slc6a20a;Slc6a20b | 0,060879819 | -2,324510574 |
| Esrra             | 0,060883295 | 2,607163111  |
| Btnl2             | 0,060884793 | -1,439641953 |
| Lasp1             | 0,060885845 | 1,828751246  |
| Ufd1l             | 0,060897407 | 2,551531474  |
| Fabp4             | 0,060902778 | 1,037958145  |
| Hibch             | 0,060931073 | 0,645234426  |



Table S2.

|                            |             |              |
|----------------------------|-------------|--------------|
| U2af2                      | 0,060944128 | 0,659424464  |
| Hspa4l                     | 0,060951302 | -0,505006154 |
| Csrp1                      | 0,060953036 | 1,339885076  |
| Anapc2                     | 0,060955017 | -0,713134766 |
| Eml1                       | 0,061       | 0,701575597  |
| Psm7                       | 0,061025872 | -0,618306478 |
| Prap1                      | 0,061110112 | 2,431682587  |
| Nup37                      | 0,061449724 | -0,678745906 |
| Gnb1                       | 0,061517699 | 0,840869904  |
| Sgcd                       | 0,061548822 | -0,596571604 |
| Ppp1r11                    | 0,061571587 | 1,28459994   |
| Akr1c19                    | 0,061585825 | -1,483643214 |
| Tmem11                     | 0,061625    | 1,386681239  |
| Man1b1                     | 0,06164     | -0,812175751 |
| Lztf1                      | 0,061654102 | -0,542770386 |
| Eps8                       | 0,061667034 | -0,715202967 |
| Cdhr5                      | 0,061679731 | -1,150344849 |
| Rpl7l1                     | 0,061680968 | -0,858390808 |
| Cdv3                       | 0,061693855 | 3,578384399  |
| Ifi35                      | 0,061708565 | -0,462896983 |
| Samm50                     | 0,061735099 | 0,835050583  |
| Ptms                       | 0,061748879 | 4,750586828  |
| Lrrc57                     | 0,061748899 | -1,121085485 |
| Psm3                       | 0,061762864 | -0,437901815 |
| Mrpl45                     | 0,061777283 | 1,195006053  |
| Igkv5-39;lgkv5-43;lgkv5-45 | 0,061846154 | -2,042988459 |
| Mia2                       | 0,061978022 | -2,112768809 |
| Ces2c                      | 0,062010977 | -1,179625193 |
| Cct7                       | 0,06204386  | -0,444855372 |
| Galns                      | 0,062659365 | -0,864056269 |
| Ankhd1                     | 0,06307221  | 1,960585276  |
| Rpl8                       | 0,063138798 | 0,884856542  |
| Gpc4                       | 0,063318777 | -1,046801885 |
| Pla2g12b                   | 0,063350055 | -1,539241155 |
| Wbp11                      | 0,063534783 | -0,675906499 |
| Ptprc                      | 0,063551198 | -0,438691457 |
| Ap3s1                      | 0,063603917 | 1,280476252  |
| Eif4g2                     | 0,063826276 | -0,542579651 |
| Gak                        | 0,064051392 | -0,725891749 |
| Rnf14                      | 0,06406015  | -0,703864415 |
| Myo1d                      | 0,064120043 | -0,701990763 |
| Pdcd6ip                    | 0,064129032 | -0,44161733  |
| Casp3                      | 0,064164859 | 0,739978155  |
| Sdha                       | 0,064188841 | 0,676297506  |
| Dhx38                      | 0,064198062 | -0,649434408 |
| Pgam1                      | 0,064216216 | 0,60993576   |
| Cryz1                      | 0,064267241 | -0,946331024 |
| Tfg                        | 0,064285714 | -0,612321854 |
| Heatr1                     | 0,06433657  | -1,312794367 |
| Tinagl1                    | 0,064355363 | 1,593064626  |
| Chka                       | 0,064385593 | -1,974610647 |
| Pex11g                     | 0,064403397 | -1,318725586 |

Table S2.

|                       |             |              |
|-----------------------|-------------|--------------|
| Atp2b3                | 0,064406048 | -1,320290883 |
| Hexb                  | 0,064431624 | -0,807266235 |
| Polr1c                | 0,06444773  | -2,214039485 |
| Ca3                   | 0,064453871 | 1,91969045   |
| Btf3l4                | 0,064471838 | 1,118312836  |
| Cops4                 | 0,064495197 | -0,571889242 |
| Sfxn1                 | 0,064500535 | -0,814204534 |
| Ifih1                 | 0,064515856 | -0,929358164 |
| Psm4                  | 0,064540426 | -0,480340322 |
| Ctnnd1                | 0,064545842 | -0,512292226 |
| Mvp                   | 0,064584127 | -0,766939799 |
| Gsta1;Gsta2           | 0,064609159 | -1,193387349 |
| Psm10                 | 0,064632911 | -0,630029043 |
| Cwc22;Gm13695;Gm13697 | 0,064674394 | -0,648171107 |
| Fkbp8                 | 0,064715789 | -0,46151034  |
| Dhrs4                 | 0,064877339 | -1,043318431 |
| Lgalsl;Pick1          | 0,064908517 | -0,844539007 |
| Dao                   | 0,064944849 | -1,636562347 |
| Acly                  | 0,0650125   | 0,386035919  |
| Txndc9                | 0,065058824 | 0,499806722  |
| Cul4a                 | 0,065080292 | -0,638242086 |
| Fam84b                | 0,065133956 | -0,770782471 |
| Mtco1                 | 0,065148225 | 2,748898824  |
| Rpl23                 | 0,065165289 | 0,743775686  |
| Sipa1l3               | 0,065186722 | -1,096872965 |
| Anpep                 | 0,065205366 | 0,475298564  |
| Smek1                 | 0,065216301 | -0,461912155 |
| Gpr39                 | 0,065232678 | -1,224706014 |
| Slc25a20              | 0,065284519 | -1,249247233 |
| Cdkn2aip              | 0,065300207 | -0,581180573 |
| Ttc39b                | 0,06535288  | -1,170302073 |
| Actr3                 | 0,065359916 | -2,737773259 |
| Mapk13                | 0,065367876 | -0,629271825 |
| Gm9791;Carhsp1        | 0,065421384 | 1,066743851  |
| Mrps28                | 0,066024742 | -1,533112208 |
| Scp2                  | 0,066271605 | -1,133259455 |
| Atp5e                 | 0,066339856 | 0,62932841   |
| Mptx2                 | 0,067103803 | -1,007192612 |
| Nagk                  | 0,067162218 | -0,858369827 |
| Cstf1                 | 0,067337423 | 2,122397741  |
| Eef1d                 | 0,067338776 | 1,527621587  |
| Ruvbl2                | 0,067385246 | -0,385907491 |
| Cyb5r3                | 0,067406346 | -0,608544668 |
| Igtp                  | 0,067407559 | -1,693042755 |
| Cndp2                 | 0,067454359 | -0,852088928 |
| Siae                  | 0,067608563 | -0,731751124 |
| Wasf2                 | 0,067633401 | 0,821416855  |
| Api5                  | 0,068386572 | -0,566843669 |
| Zyx                   | 0,068560976 | 2,951136907  |
| Slc5a11               | 0,068596954 | -1,145147324 |
| 2010002M12Rik         | 0,068933602 | -1,428939819 |
| H1f0                  | 0,068960486 | 0,574853261  |

Table S2.

|               |             |              |
|---------------|-------------|--------------|
| Sft2d2        | 0,069003021 | -0,670342763 |
| Dync1li1      | 0,069005045 | -0,592533747 |
| Tgoln1;Tgoln2 | 0,069030426 | -0,803821564 |
| Ctsc          | 0,069072581 | -0,485748927 |
| Tardbp        | 0,069074747 | 1,388399124  |
| Nqo1          | 0,06914459  | -1,379800161 |
| Ppp2r2a       | 0,069214575 | 1,053480784  |
| Nudt19        | 0,069278392 | -0,624025345 |
| Rab22a        | 0,069562249 | 0,732657115  |
| Acta2         | 0,069825476 | 2,263641993  |
| Pfdn1         | 0,069983968 | -0,288194656 |
| Sym           | 0,070038038 | 0,897293727  |
| Tomm34        | 0,070166008 | -0,485054652 |
| Tnks1bp1      | 0,070205384 | 1,341393789  |
| Cspg4         | 0,070211254 | 1,750449498  |
|               | 0,07023541  | -0,733788808 |
| Hddc2         | 0,070239841 | -0,982290268 |
| Coro1a        | 0,070275449 | 0,702304204  |
| Ctnnbip1      | 0,07030495  | -0,779797872 |
| Dlgap4        | 0,070309524 | -0,848748525 |
| Sco1          | 0,070345654 | -0,652879715 |
| Dock2         | 0,070379345 | -0,602797826 |
| Psmc11        | 0,07038408  | -0,3793691   |
| Oplah         | 0,070416    | 0,896004359  |
| Ccndbp1       | 0,070449304 | -1,065711339 |
| Vamp8         | 0,070454183 | 1,419296265  |
| Cnot1         | 0,070631164 | -0,514031092 |
| Aldh3a2       | 0,070757129 | -0,866738637 |
| Smchd1        | 0,070826772 | -0,565133413 |
| Ube4a         | 0,070896552 | -0,83623759  |
|               | 0,071033399 | -0,446673711 |
| Rpl38         | 0,071053974 | 1,264673869  |
| Psmc4         | 0,071329412 | -0,359739304 |
| Ppap2a        | 0,07148728  | -1,193191528 |
| Timm23        | 0,071557297 | 3,752003988  |
| Tcf25         | 0,071769306 | 1,026950836  |
| Rnase1        | 0,071902344 | 3,037406921  |
| Ncapd2        | 0,071921951 | -1,570923487 |
| Gstm7         | 0,072186589 | -1,209343592 |
| Fcgbp         | 0,072256809 | -0,93178304  |
| Mafb          | 0,072265107 | 1,329774857  |
| Tln2          | 0,072327167 | -0,695045471 |
| Gpkow         | 0,072745894 | 1,255898794  |
| Csrp2         | 0,072816248 | 2,963793437  |
| Pvrl2         | 0,072872587 | -0,904327393 |
| Vav1          | 0,07287767  | 1,115683238  |
| Prkcd         | 0,072886738 | -0,705982844 |
| Faf2          | 0,072957364 | 0,859593074  |
| Pigs          | 0,073028128 | -0,786390305 |
| Rps5          | 0,073154957 | 1,439231237  |
| Dpt           | 0,073183908 | 2,026250839  |
| Ube4b         | 0,073193858 | -0,530787786 |

Table S2.

|               |             |              |
|---------------|-------------|--------------|
| Fam173a       | 0,073225434 | 1,822561264  |
| Ogfr          | 0,073254075 | -0,578460058 |
| Npc2          | 0,073264169 | -0,536258062 |
| Reep6         | 0,073296046 | -1,413695017 |
| Itpk1         | 0,073301435 | -0,658340454 |
| Echdc1        | 0,073334615 | -0,803115845 |
| Exoc5         | 0,073349904 | -0,641887029 |
| Lmbrd2        | 0,073409742 | 0,716485341  |
| Gng2          | 0,073469466 | -0,540301641 |
| Smndc1        | 0,073527066 | 1,71032842   |
| Ppp6r1        | 0,073555977 | -0,540231705 |
| Rps23         | 0,073596958 | 0,768281301  |
| Ctss          | 0,073605338 | -0,889523824 |
| Sar1b         | 0,073619048 | -0,403778712 |
| Metap1        | 0,073666984 | -0,593153    |
| Atp6v1b2      | 0,073986755 | 0,926062902  |
| Clpp          | 0,074043602 | 0,800431569  |
| Aldh1a2       | 0,074056818 | -0,660118103 |
| Ugt1a7c       | 0,074139623 | -0,986143748 |
| Chordc1       | 0,074151229 | -0,518814087 |
| Snx12         | 0,074209632 | 0,901203156  |
| Ptpn2         | 0,074344958 | 0,633705775  |
| Btf3          | 0,074391714 | 1,035221736  |
| Efemp1        | 0,074664158 | 1,006177266  |
| Eed           | 0,074721805 | -0,809532166 |
| Gm15800       | 0,074738028 | 0,780143102  |
| Acot7         | 0,074795497 | 0,662768046  |
| Nlr1          | 0,074841612 | 4,562434514  |
| Ces2g         | 0,075363296 | -0,770647685 |
| Gdpd1         | 0,075487371 | -0,703442256 |
| Ube2c         | 0,075519553 | -1,554839452 |
| Cav1          | 0,075589935 | 0,786480586  |
| Igkv4-57      | 0,075645191 | -0,617978414 |
| Eftud1        | 0,075660448 | -0,463223139 |
| Mpst          | 0,07568     | 0,758391062  |
| C2cd2l        | 0,075715888 | -0,351538976 |
| Smarce1       | 0,075799257 | -0,542469025 |
| Tbc1d8b       | 0,075825441 | -0,516049067 |
| Gpaa1         | 0,075825926 | -0,945646922 |
| Tpm3-rs7      | 0,075837188 | 1,377702713  |
| Pak1ip1       | 0,075851577 | -0,800358454 |
| Ccdc58        | 0,0758962   | -0,605838776 |
| Gsr           | 0,075940905 | -0,586109797 |
| Eif1ax        | 0,075945155 | 1,570701599  |
| 0610037L13Rik | 0,07595225  | 1,013126373  |
| Cmas          | 0,075970696 | -0,448284149 |
| Fxr2          | 0,07599633  | 2,156080882  |
| Polr2b        | 0,076011091 | 0,44370079   |
| Spcs2         | 0,076014639 | 0,889275233  |
| Zranb2        | 0,076022059 | 1,814358393  |
| Urb2          | 0,07604033  | -1,336606344 |
| Gk            | 0,076084871 | 0,804713567  |

Table S2.

|                |             |              |
|----------------|-------------|--------------|
| Dnajc10        | 0,076091996 | -0,449935277 |
| Fbxo3          | 0,076102004 | 1,756137848  |
| Aamdc          | 0,076113242 | -0,931056976 |
| Degs2          | 0,076117972 | 1,636175791  |
| Tubb5          | 0,076134668 | 1,191348394  |
| Vdac2          | 0,076162063 | 0,918781916  |
| Manba          | 0,076171376 | -0,869966507 |
| Arl2           | 0,076240876 | -1,331397374 |
| M6pr           | 0,076618182 | -0,631246567 |
| Rb1cc1         | 0,076681777 | -1,195901235 |
| Pfdn4          | 0,076726612 | 1,049681981  |
| Ndufa4         | 0,076751361 | -0,568642298 |
| Tomm22         | 0,076946703 | 1,167847951  |
| Psmd12         | 0,077016275 | -0,513784409 |
| Ttc7;Ttc7a     | 0,077085973 | -2,33743604  |
| Acnat1;Acnat2  | 0,077146979 | -1,220453262 |
| Lzic           | 0,077155797 | -0,724756877 |
| Pml            | 0,077189189 | -0,436201731 |
| Rps13          | 0,077216606 | 0,990708669  |
| Zg16           | 0,077482944 | -1,721083959 |
| Ifitm2         | 0,0775      | 1,071400325  |
| Ddb1           | 0,077552561 | -0,519213994 |
| Znfx1          | 0,077569757 | -1,008583069 |
| Golga5         | 0,077763441 | -0,521161397 |
| Tmc4           | 0,077833184 | -1,198502223 |
| Adar           | 0,077962399 | -2,407038371 |
| Ergic1         | 0,078107335 | 2,27572759   |
| Mat2b          | 0,078292335 | -0,423859278 |
| Gcc1           | 0,078362177 | -1,124660492 |
| Spag9          | 0,078380697 | -0,447734197 |
| Fam3c          | 0,078432143 | -0,436314265 |
| Dnajc9         | 0,079462423 | -0,527142207 |
| Pi4k2b         | 0,079516444 | -1,152666728 |
| Add3           | 0,079523979 | 0,751565297  |
| Optn           | 0,079532743 | -0,714621862 |
| Hcn3           | 0,079570922 | 1,994950612  |
| Fbln5          | 0,079587189 | 0,924378713  |
| Arf1;Arf3;Arf2 | 0,079603189 | -0,494714101 |
| Bclaf1         | 0,079641526 | 0,754449844  |
| Prpf6          | 0,079658059 | -0,445624034 |
| Hgs            | 0,0799188   | -0,400697708 |
| Pnp2           | 0,079989399 | -4,926720937 |
| Akr1e2;Akr1e1  | 0,080119718 | -0,665808996 |
| Pcbp1          | 0,080169312 | -0,583694458 |
| Nckap1         | 0,080179262 | -0,594772975 |
| Fam21          | 0,080190308 | 0,674016953  |
| Lrpap1         | 0,08024978  | -0,533009847 |
| Dock8          | 0,080492576 | -0,673945745 |
| Triobp         | 0,080562937 | 1,140656789  |
| St14           | 0,080575944 | -0,541113536 |
| Fdps           | 0,080607018 | 0,471289317  |
| Supt6h         | 0,080613497 | -0,455607096 |

Table S2.

|                 |             |              |
|-----------------|-------------|--------------|
| Tbc1d15         | 0,080633421 | -0,349796931 |
| Pttg1ip         | 0,080704028 | -0,506031672 |
| Cyp3a13         | 0,081843206 | -0,820359548 |
| lap             | 0,081905759 | -1,633835475 |
| Aamp            | 0,08191456  | -0,772698085 |
| Mme             | 0,081928634 | -1,037740707 |
| Npc111          | 0,082163478 | -0,859190623 |
| Rab10           | 0,082199826 | -0,318255107 |
| Ptbp3           | 0,082354167 | -0,385274251 |
| Gaa             | 0,082588031 | -0,584624608 |
| Pla2g7          | 0,082823529 | 1,861016591  |
| Prg2            | 0,082826575 | 1,598861059  |
| Dab1            | 0,082852204 | -1,531134923 |
| Lgals3          | 0,082895238 | 0,751925151  |
| Crebbp;Ep300    | 0,0828981   | -1,176446915 |
| Nsf             | 0,082901288 | -0,364426295 |
| Psph            | 0,082926244 | -0,678372701 |
| Ints2           | 0,082967071 | -3,485375086 |
| Specc1          | 0,082972509 | -0,711915334 |
| Prss32          | 0,083043852 | -1,120555242 |
| Psmf1           | 0,083115318 | 0,835248311  |
| Ict1            | 0,083151724 | -0,571337382 |
| Abcf2           | 0,083186908 | 0,550903956  |
|                 | 0,083301967 | 1,682090123  |
| Myo7b           | 0,083328192 | -0,673455556 |
| Evl             | 0,083373288 | -1,222658793 |
| Mkl2;Mkl1;Myocd | 0,083448511 | 0,673758825  |
| Ndufa12         | 0,083491901 | 0,957555135  |
| Uqcrq           | 0,083519591 | 1,054520925  |
| Al837181;Bles03 | 0,083521368 | 1,346177419  |
| Myl10           | 0,083545687 | 2,582544963  |
| Bri3bp          | 0,08356314  | -2,169375102 |
| Hnrnpa1         | 0,083591837 | 0,732633591  |
| Erbb2ip         | 0,083650255 | -0,513291677 |
| Prpsap1         | 0,083721325 | -0,734642665 |
| Dock1           | 0,08383715  | -0,63187472  |
| Cyp4b1          | 0,083841618 | -1,777491887 |
| Pex13           | 0,083881356 | -0,745137533 |
| Fez2            | 0,083898391 | -0,757603963 |
| Pcnp            | 0,08391231  | 1,991474152  |
| Ipo4            | 0,083932318 | -1,005797068 |
| Trim32          | 0,083942761 | -2,351626714 |
| Hnrnp11         | 0,083966216 | 0,395673116  |
| Srsf4           | 0,083983122 | 1,463204702  |
| Myl12a          | 0,084037194 | -0,605130514 |
| Finc            | 0,084275399 | 1,040359497  |
| Memo1           | 0,084302775 | 4,000252406  |
| Dctn3           | 0,084346218 | -0,44177564  |
| Decr1           | 0,084567114 | -0,783258438 |
| Cog4            | 0,084830821 | -0,491776148 |
| Stat3           | 0,084856187 | -0,570643743 |
| RtcA;Rtca       | 0,084901928 | 0,50756518   |

Table S2.

|               |        |             |              |
|---------------|--------|-------------|--------------|
| H2-Q2         |        | 0,084927197 | -1,701557159 |
| Gpx3          |        | 0,084975773 | -0,615243912 |
|               | Sep-05 | 0,085205342 | -0,60687383  |
| Snrnp200      |        | 0,085331126 | -0,361134211 |
| Hs1bp3        |        | 0,08534     | -2,008931478 |
| Exoc8         |        | 0,08536311  | -0,744883219 |
| Gbe1          |        | 0,085379768 | 1,352414449  |
| Akap1         |        | 0,085401823 | -0,640282313 |
| Ears2         |        | 0,085411176 | -1,030968348 |
| S100a13       |        | 0,085450622 | -1,012756348 |
| Tmem9b        |        | 0,085458784 | -0,681854884 |
| Mrpl40        |        | 0,085497521 | -0,753229777 |
| Dctn5         |        | 0,085521595 | 1,618413289  |
| Tpm2          |        | 0,085592685 | 1,642026265  |
| Npepps        |        | 0,085663894 | -0,519525528 |
| Pgk1          |        | 0,086011561 | 0,424432119  |
| Hnrnp1        |        | 0,086306931 | 1,098185857  |
| Ak4           |        | 0,08670404  | 0,520548503  |
| Cxadr         |        | 0,087114403 | 0,615279516  |
| Tlr3          |        | 0,087147541 | -1,112639109 |
| Gcc2          |        | 0,087186161 | -0,531511943 |
| Prpf4b        |        | 0,087219032 | -0,748589198 |
| Actr5         |        | 0,087250616 | -1,330102921 |
| Ccb12         |        | 0,087279279 | 2,379329046  |
| Exoc4         |        | 0,087281633 | -0,759191513 |
| Cd38          |        | 0,087282219 | -0,35177803  |
| Gm10020;Rpl15 |        | 0,08729064  | 0,742736181  |
| Nudt9         |        | 0,087309329 | -0,510004679 |
| Ctdp1         |        | 0,087322368 | -1,135655721 |
| Phactr4       |        | 0,087352941 | -0,998908361 |
| Ccdc9         |        | 0,087424366 | 1,883248011  |
| Sephs1        |        | 0,087432763 | -0,462872823 |
| Smc4          |        | 0,087941368 | -0,413217545 |
| Mettl16       |        | 0,087980472 | -1,186934153 |
| Tsr1          |        | 0,088267958 | 0,987888972  |
| Pecr          |        | 0,088310428 | -0,847320557 |
| Zc3h15        |        | 0,088339257 | 1,168912888  |
| Gnai3         |        | 0,08834332  | -0,391196569 |
| Ppp2r4        |        | 0,088377419 | -0,402921041 |
| Cat           |        | 0,088381877 | -1,568431854 |
| Pip4k2c       |        | 0,088406124 | -0,503161748 |
| Nme3          |        | 0,088414911 | -0,510679245 |
| Eif4b         |        | 0,088448052 | 0,97780482   |
| Epn1          |        | 0,088469076 | -0,923888524 |
| Pdlim7        |        | 0,088486618 | 1,194465637  |
| Fkbp10        |        | 0,088519903 | 1,322974523  |
| Eif3i         |        | 0,088534622 | 1,259031296  |
| Skap2         |        | 0,088537409 | 1,448937098  |
| Nup62         |        | 0,088540193 | -0,565892537 |
| Dst           |        | 0,08859187  | -2,448271434 |
| Ehbp111       |        | 0,088888532 | 1,515662511  |
| Hnrnpa3       |        | 0,088926282 | -0,68245252  |

Table S2.

|               |             |              |
|---------------|-------------|--------------|
| Hsp90aa1      | 0,088959872 | -0,406614939 |
| Nxn           | 0,089047238 | 2,17766571   |
| Olfm4         | 0,089665867 | 2,165515264  |
| Lrp1          | 0,0897376   | -0,576145172 |
| 1700021F05Rik | 0,089796178 | -2,458669027 |
| Dimt1         | 0,089811502 | -0,726050059 |
| Eif3d         | 0,089812995 | 0,658732732  |
| Agr2          | 0,089840063 | 0,602261861  |
| Scarb2        | 0,089867729 | -0,831349055 |
| Rpl13a        | 0,089884219 | 0,627059301  |
| Thoc1         | 0,089939394 | -0,440570831 |
| Atp6v0c       | 0,089955556 | -0,634901683 |
| Sgsh          | 0,089979316 | -0,862370173 |
| Fkbp2         | 0,090006359 | 1,207150141  |
| Glud1         | 0,090011173 | 0,73052152   |
| Hectd3        | 0,090027006 | -0,402393977 |
| Eif4ebp2      | 0,09085624  | 1,528635025  |
| Zc3h14        | 0,090901899 | 1,053800583  |
| Nln           | 0,090928063 | -0,819178263 |
| Arl8a         | 0,091318074 | -0,840288798 |
| Dsc2          | 0,092       | 1,066900253  |
| Gna13         | 0,092072498 | -0,520531972 |
| Acads         | 0,092107002 | -0,34917895  |
| Arfrp1        | 0,092132075 | -0,925830841 |
| Safb          | 0,09214511  | 0,453071594  |
| Exog          | 0,092241569 | -1,161149343 |
| Cyb5b         | 0,092243941 | -0,661576589 |
| Ap2a1         | 0,092266458 | -0,516294479 |
| Ldb3          | 0,092291308 | 0,755791982  |
| Tbxas1        | 0,092298507 | 1,032457352  |
| Trmt11        | 0,092313972 | -0,94117101  |
| Snrnp70       | 0,092316119 | 1,457857768  |
| Fads2         | 0,09243125  | -1,09866333  |
| Trappc4       | 0,092711944 | -3,044878006 |
| Tma7          | 0,092836193 | 1,43784078   |
| Aldh3b1       | 0,093063133 | -0,77699852  |
| Gba           | 0,093274143 | -0,795630773 |
| Coro1b        | 0,09341323  | 0,920312881  |
| Ywhab         | 0,093427683 | 0,797411601  |
| Phpt1         | 0,093451437 | -0,576435089 |
| Fgfr1op2      | 0,09365251  | -0,629852931 |
| Ipo7          | 0,093653251 | -0,567979177 |
| Psmb6         | 0,093661253 | 0,711678187  |
| Dctn2         | 0,093724884 | -0,460711797 |
| Flnb          | 0,093725794 | 0,668052038  |
| Ybx1          | 0,09379845  | 1,155272166  |
| Comt          | 0,093808135 | 0,41416804   |
| Dnajc13       | 0,093822086 | -0,558385849 |
| Dbr1          | 0,093854037 | 1,087060928  |
| Baz1b         | 0,093854406 | -0,404762904 |
| Mipep         | 0,093871218 | -1,065658569 |
| Myh11         | 0,093880184 | 1,917058945  |



Table S2.

|                                        |             |              |
|----------------------------------------|-------------|--------------|
| Ptcd3                                  | 0,093944615 | -0,631235758 |
| Ttc37                                  | 0,093952344 | -0,488461812 |
| Ndrp1                                  | 0,093981623 | 1,062459946  |
| Gata6                                  | 0,094016936 | -1,031960169 |
| Raph1                                  | 0,094070988 | 1,492358526  |
| Gtf3c1                                 | 0,094089368 | -0,448101679 |
| Sub1                                   | 0,094161912 | 1,013185501  |
| Sypl                                   | 0,094255547 | -0,627687454 |
| Kcmf1                                  | 0,095041221 | 1,981004079  |
| Pdlim3                                 | 0,09506331  | 1,231671651  |
| mt-Co3                                 | 0,095113827 | -1,305196762 |
| Cd2ap                                  | 0,095186544 | -0,396835327 |
| Dcaf11                                 | 0,095917683 | 2,9399484    |
| Cdc23                                  | 0,096085301 | -1,532351176 |
| Sptlc2                                 | 0,096106545 | -0,635945002 |
| Rpl10;Rpl10l                           | 0,096506061 | 0,825415293  |
| Fv4                                    | 0,096526236 | -2,239855448 |
| Ahctf1                                 | 0,096526874 | -1,05875206  |
| Epx                                    | 0,096567527 | 1,275757472  |
| Enah                                   | 0,096579227 | 0,603033066  |
| Elmo3                                  | 0,09664085  | -0,640479406 |
| Pank1                                  | 0,096704992 | -1,024641673 |
| Ranbp1                                 | 0,096714286 | -0,414890289 |
| Trim33                                 | 0,096729465 | -0,465541204 |
| Col4a1                                 | 0,09675     | 1,098623276  |
| Sin3a                                  | 0,096770504 | -0,420703888 |
| Itga3                                  | 0,096790977 | -0,67628479  |
| Coq4                                   | 0,096802413 | -0,611923854 |
| Cox5b                                  | 0,096875472 | 1,709580104  |
| Klc1                                   | 0,096879154 | -0,557301839 |
| Hist1h2af;Hist1h2ah;Hist3h2a;Hist1h2ab | 0,096952381 | 1,395296733  |
| Fyb                                    | 0,097024793 | 1,785614014  |
| Heatr5b                                | 0,097147147 | -0,604761124 |
| Ralgapa2                               | 0,097524381 | -0,618869146 |
| Cyp2c65                                | 0,097529235 | -0,91418457  |
| Cog1                                   | 0,097728839 | -0,611728668 |
| Nedd4                                  | 0,098086826 | 0,736923854  |
| Fam175b                                | 0,098100224 | -0,593427658 |
| Slc40a1                                | 0,098212257 | -2,172388713 |
| Tor1b                                  | 0,098475764 | -0,657488505 |
| Armt1                                  | 0,098549254 | -0,851600011 |
| Rap1gds1                               | 0,098597171 | -0,73482577  |
| Mob1a                                  | 0,098622853 | -0,522413254 |
| Cbx3                                   | 0,098666667 | 0,715023041  |
| Papola;Papolb                          | 0,098670641 | -0,473752975 |
| Ints3                                  | 0,098818114 | -0,750123978 |
| Cfl1                                   | 0,098836795 | 0,919425964  |
| Jagn1                                  | 0,098866864 | 2,915216446  |
| Nop58                                  | 0,09889153  | -0,328419367 |
| Pycard                                 | 0,098940044 | -0,423254649 |
| Gip                                    | 0,098965056 | -2,714659373 |
| Tgfb1i1                                | 0,098994811 | 1,369655609  |

Table S2.

|                         |             |              |
|-------------------------|-------------|--------------|
| Vps51                   | 0,099013333 | -0,804463704 |
| Trappc10                | 0,099435746 | -2,283254623 |
| Capg                    | 0,099509239 | 0,881828308  |
| Ap2a2                   | 0,099743552 | -0,48855718  |
| Pspc1                   | 0,099814022 | 1,844144185  |
| Ndufa6                  | 0,099817109 | -0,623378118 |
| Ssbp1                   | 0,099846834 | -0,619399389 |
| Slk                     | 0,099873436 | 0,706094106  |
| Defa17;Defa1            | 0,100411765 | 0,94588089   |
| Gm20425                 | 0,100422907 | -0,65480423  |
|                         | 0,100496694 | 1,076552709  |
| Klc4                    | 0,100530792 | -0,490211487 |
| Capn1                   | 0,100604549 | -0,517156601 |
| Txndc12                 | 0,100709158 | -0,441977819 |
| Mrps30                  | 0,100825769 | 0,952946345  |
| Ngp                     | 0,100828091 | 2,44554011   |
| Isoc1                   | 0,100838568 | -0,659318924 |
| Csnk1g3;Csnk1g2;Csnk1g1 | 0,100845029 | -1,265940984 |
| Ppp2r5c                 | 0,100864234 | -1,425207138 |
| Alad                    | 0,100999272 | -0,6354599   |
| Arhgdia                 | 0,101072886 | 0,556073507  |
| Pank4                   | 0,101146608 | -0,524669011 |
| Nlrp6                   | 0,101580786 | -0,625190735 |
| Pcp4l1                  | 0,101587209 | 1,329072952  |
| 9030617O03Rik           | 0,101597091 | -0,529949188 |
| Mapk14                  | 0,10191582  | -0,489526749 |
| Srp19                   | 0,101989833 | 1,200789134  |
| Soat2                   | 0,102021755 | -1,617880503 |
| Cc2d1b                  | 0,102137581 | -1,229744593 |
| Ckb                     | 0,102211594 | 0,931266785  |
| Fgd4                    | 0,102735166 | -0,549151738 |
| Taldo1                  | 0,102999277 | -0,481160482 |
| Psma1                   | 0,103       | -0,388711929 |
| Nufip2                  | 0,103080029 | 0,595929464  |
| Chmp4b                  | 0,103154401 | 1,036101023  |
| Ywhag                   | 0,103228881 | 0,640263875  |
| Ints1                   | 0,103400576 | -0,699691137 |
| Dek                     | 0,103781138 | -0,47618103  |
| Col1a1                  | 0,104336691 | 1,416500727  |
| Uchl3;Uchl4             | 0,104338594 | -0,623804092 |
| Rexo2                   | 0,104413496 | 0,994441986  |
| Lsm4                    | 0,104456165 | -0,386030833 |
| Selm                    | 0,104478632 | 1,539440155  |
| Txn2                    | 0,104488506 | -0,755976359 |
| Glod5                   | 0,104500359 | -0,857601802 |
| Tsg101                  | 0,10453067  | 0,341447194  |
| Epb4.1l1;Epb4l1l        | 0,104581246 | -0,561503728 |
| Sec23a                  | 0,104586552 | -0,474493663 |
| Srd5a3                  | 0,1046      | 3,151032766  |
| Eif2s3y                 | 0,104605282 | 1,661019643  |
| Sbno1                   | 0,10465616  | 1,343890508  |
| Cul4b                   | 0,104668563 | -0,799954732 |

Table S2.

|              |             |              |
|--------------|-------------|--------------|
| Ppp1r12b     | 0,104674768 | 1,180779775  |
| Gid8         | 0,104731183 | -1,858258565 |
| Sorbs2       | 0,10474306  | 0,760823568  |
| Cask         | 0,105060412 | -0,527471542 |
| Zmpste24     | 0,105497872 | -0,301514308 |
| Hnrnpa2b1    | 0,105572747 | 1,147216161  |
| Limd1        | 0,105647727 | 0,805894216  |
| Myadm        | 0,105882519 | 2,593439738  |
| Bnip1        | 0,105936215 | -0,487975438 |
| Akr1c14      | 0,105951909 | -0,98587354  |
| Timm8b       | 0,105957507 | 1,281712214  |
| Rae1         | 0,106320848 | 0,922407786  |
| Isyna1       | 0,1065      | -0,430999756 |
| Arfip1       | 0,106599859 | -0,580221812 |
| Cda          | 0,106863188 | -0,811645508 |
| Gna11        | 0,107123326 | -0,579512914 |
| Tra2a        | 0,107394366 | 2,044005076  |
| Eml2         | 0,107488045 | 0,814949671  |
| Gsto1        | 0,107563688 | -0,799550374 |
| Arg2         | 0,107887561 | -0,582375844 |
| Pmpcb        | 0,108190877 | -0,50075531  |
| Mlycd        | 0,108266854 | -1,447940191 |
| Cnn1         | 0,108670407 | 0,821219126  |
| Vps11        | 0,108694678 | -0,990153631 |
| Man1a1;Man1a | 0,108713786 | -0,660155614 |
| Lrrfip2      | 0,108770848 | -0,594179789 |
| Ilf2         | 0,108824598 | -0,450750987 |
| Synpo2       | 0,108900699 | 0,86918513   |
| Gk5          | 0,108921788 | -1,868586222 |
| Frk          | 0,10893231  | 0,850708008  |
| Stxbp2       | 0,108951185 | -0,468873978 |
| Galk2        | 0,109029758 | -0,634461085 |
| Sec14l1      | 0,109037448 | -0,858029048 |
| Trmt10c      | 0,109052925 | 0,680544535  |
| Pts          | 0,109094444 | -0,934797287 |
| Rpsa         | 0,109105263 | 0,981623332  |
| Golph3l      | 0,109113116 | -0,575265249 |
| Crnk1        | 0,109119889 | -0,829931895 |
| Slc26a2      | 0,10912892  | -1,152537664 |
| Alox5ap      | 0,109159944 | 1,564374288  |
| Myef2        | 0,109170257 | 0,763044357  |
| Stx12        | 0,109235908 | -0,5946153   |
| Vimp         | 0,109732044 | -0,878411611 |
| Sorbs1       | 0,109798064 | 4,044142405  |
| Ap1m1        | 0,109807878 | -0,419383367 |
| Sec31a       | 0,110008276 | -0,348185221 |
| Dlg1         | 0,110084196 | -0,519637426 |
| Fbp2         | 0,110089593 | -0,692427317 |
| Dlst         | 0,11015978  | 0,299636841  |
| Pdlim1       | 0,110403304 | 1,0241038    |
| Thoc6        | 0,110408247 | -0,608630498 |
| Myo15b       | 0,110412655 | -0,522699992 |

Table S2.

|                                  |             |              |
|----------------------------------|-------------|--------------|
| Akap7                            | 0,110503775 | -2,033852895 |
| Blmh                             | 0,110521262 | -0,613218943 |
| Muc2                             | 0,11057967  | 1,645459493  |
| Rps27a                           | 0,11083756  | 1,579205195  |
| Stx5a;Stx5                       | 0,110980822 | -0,508652369 |
| Ndufa3                           | 0,111323751 | 2,182051341  |
| Bin3                             | 0,11157377  | -0,810621262 |
| Apob                             | 0,111645051 | -0,523034414 |
| Itga1                            | 0,111650034 | -0,387289047 |
| Rbm42                            | 0,111726402 | 0,614188512  |
| Adsl                             | 0,111789905 | -0,449701309 |
| Kif1c                            | 0,112185412 | -0,783636093 |
| Cd63                             | 0,112206242 | -1,185492198 |
| Gns                              | 0,11226158  | -0,751635234 |
| Mrps9                            | 0,112282417 | -0,560604731 |
| Adipor2                          | 0,112358696 | -1,292947769 |
| Btnl1                            | 0,112435078 | -0,737805049 |
| Wdr36                            | 0,112511565 | -0,523305893 |
| Aldh4a1                          | 0,112541272 | -0,71637853  |
| Serpinb6a;Serpib6                | 0,112545085 | -0,77947998  |
| Nudt14                           | 0,112588155 | 1,388243993  |
| Tspan7                           | 0,112617468 | -1,967669805 |
| Adss                             | 0,112693767 | 0,573067983  |
| Bud31                            | 0,112695064 | 0,661785126  |
| Camk2g                           | 0,112772973 | -0,409164429 |
| Sec16a                           | 0,112920999 | 0,633406957  |
| Paxbp1                           | 0,113090418 | -0,868236542 |
| Preb                             | 0,113265003 | 0,907388687  |
| Bag3                             | 0,113490566 | 0,62516276   |
| Bcas2                            | 0,113504711 | -0,506216685 |
| G3bp1                            | 0,113511769 | 0,696673711  |
| Ctcf                             | 0,113581145 | -0,472998937 |
| Psmc9                            | 0,113825269 | 1,698478063  |
| Nosip                            | 0,114143721 | 2,510560989  |
| Erh                              | 0,114158389 | 0,706209819  |
| Mgat4a                           | 0,114340483 | -2,002847036 |
| Tpm1                             | 0,114358149 | 1,157142639  |
| Rassf2                           | 0,11503282  | -1,816136042 |
| Vkorc1l1                         | 0,115349398 | -2,34822909  |
| Pabpn1;Gm20521                   | 0,115355184 | 1,667316437  |
| Exosc10                          | 0,115601329 | -0,553450902 |
| Ndufa9                           | 0,115619681 | 0,580279032  |
| Map1s                            | 0,115696607 | 0,356469472  |
| Casp8                            | 0,115708751 | -0,514218012 |
| Slc25a24                         | 0,115750332 | -0,547369639 |
| Cers2                            | 0,115773635 | 0,996796926  |
| Stim1                            | 0,115786096 | 0,356820424  |
| 5330417C22Rik;Kiaa1324           | 0,115850766 | 1,273691177  |
| Rfk                              | 0,11591461  | 0,933195114  |
| Exosc3                           | 0,115928    | -2,096190135 |
| Bag6                             | 0,115991989 | -0,416228612 |
| Kxd1;Uba52;Gm8797;Ubc;Ubb;Gm7808 | 0,116029197 | -0,498320262 |

Table S2.

|                      |             |              |
|----------------------|-------------|--------------|
| Ube2j2               | 0,116724138 | -0,797634761 |
| Ppp2r1a              | 0,117388999 | -0,27206103  |
| Oasl1                | 0,117466578 | 0,624857585  |
| Itgam                | 0,117544371 | 0,64575386   |
| Cldn7                | 0,11760582  | -0,735427221 |
| Iqgap2               | 0,118170522 | -0,518791199 |
| Cacybp               | 0,118446499 | -0,512183507 |
| Dapk2                | 0,118671937 | -0,559451421 |
| Itgal                | 0,118750165 | -1,338224411 |
| Cwc15                | 0,118759076 | 1,508207957  |
| Pde3a;Pde3b          | 0,118828496 | -0,937834422 |
| Prcp                 | 0,119699803 | -0,43997256  |
| Pkp3                 | 0,119750164 | -0,584721247 |
| Tpd52                | 0,119828947 | -0,422547658 |
| Decr2                | 0,119923784 | -0,898122152 |
| Clpx                 | 0,119984242 | -0,509509405 |
| Lmtk2                | 0,119992136 | -1,702850978 |
| Ctnna1               | 0,12007082  | -0,480250041 |
| Anapc5               | 0,120104575 | -1,776254654 |
| Cd36                 | 0,120149606 | -0,842153549 |
| Mta3                 | 0,120183126 | -0,498456319 |
| Mtpn                 | 0,120206942 | 0,366118113  |
| Cpsf6                | 0,12026178  | 0,756865819  |
| Dcaf8                | 0,120512084 | -0,522324244 |
| Ube2v1;Gm20431       | 0,120610966 | 0,601768494  |
| Fabp1                | 0,120683561 | -0,74195226  |
| Rint1                | 0,120694408 | -0,810138067 |
| Napg                 | 0,120722295 | -0,442427953 |
| Selo                 | 0,120747567 | 1,515878677  |
| Ppp1r12c             | 0,120772934 | 0,71039772   |
| Sh3bgrl3             | 0,120778646 | 1,684699376  |
| Lnp                  | 0,120801044 | -0,528006872 |
| Gm9242;Gm8991;Gm6793 | 0,120825974 | 1,155252457  |
| Vac14                | 0,120857329 | -0,503797531 |
| Thoc5                | 0,120866753 | -1,162792842 |
| Appl1                | 0,120944984 | 0,977307002  |
| Nrp1                 | 0,121023316 | 1,092204412  |
| Iars2                | 0,12110175  | -0,459414164 |
| Tln1                 | 0,121120623 | -0,314614614 |
| Chchd7               | 0,121362637 | 1,608235677  |
| Tprn                 | 0,121372093 | 1,609033585  |
| Afg3l1               | 0,121381536 | -0,81233724  |
| Ufm1                 | 0,122650323 | 0,948375066  |
| Cog3                 | 0,122659794 | -0,49524498  |
| Ugt1a9               | 0,122738878 | 2,536875407  |
| Glrx                 | 0,122794591 | 0,726094564  |
| Fmo2                 | 0,122934363 | 0,611385981  |
| Mrpl1                | 0,123490675 | -0,836114248 |
| Mgst3                | 0,123578406 | 1,779558182  |
| Ugp2                 | 0,123961588 | -0,552076976 |
| Slc39a5              | 0,12396929  | -1,492076238 |
| Gramd3               | 0,123969309 | -1,438119888 |

Table S2.

|          |             |              |
|----------|-------------|--------------|
| Pigr     | 0,124040999 | -0,512158076 |
| Cd48     | 0,124048531 | -0,598302205 |
| Igkc     | 0,124056519 | -0,544056575 |
| Tns1     | 0,124058265 | 0,50898997   |
| Tgm2     | 0,124064185 | 0,728486379  |
| Plxnb2   | 0,124111392 | -0,452699661 |
| Tha1     | 0,124119974 | -0,895865122 |
| Col6a3   | 0,124120513 | -0,798720042 |
| Ube2d2   | 0,124127796 | 0,791987737  |
| Zyg11b   | 0,124136882 | -2,099651337 |
| Zdhhc13  | 0,124200128 | -0,382118861 |
| Mfap1    | 0,124208122 | 0,875172297  |
| Fam3d    | 0,124215599 | -0,593392054 |
| Hmbs     | 0,124249842 | -0,468034744 |
| Slc25a45 | 0,124286984 | -0,859263102 |
| Ranbp2   | 0,124306122 | -0,235385895 |
| Ccdc22   | 0,124307497 | -0,612024307 |
| Nfu1     | 0,124320815 | -0,501097361 |
| Grem1    | 0,124328283 | 0,94564565   |
| Sec31b   | 0,124341556 | -1,174378077 |
|          | Sep-08      |              |
|          | 0,124386523 | -0,526742935 |
| Lpar1    | 0,124392607 | -1,331862768 |
| Sec16b   | 0,1244      | -0,72421964  |
| Smim1    | 0,124406822 | 1,853808085  |
| Nubp1    | 0,124465649 | 1,805844625  |
| Dars     | 0,124474149 | -0,52428182  |
| Mier1    | 0,124485461 | -0,731676102 |
| Cpt1a    | 0,124487131 | -0,533191045 |
| Gde1     | 0,124565327 | -0,820749919 |
| Nt5c2    | 0,12457071  | -1,727078756 |
| Ube2j1   | 0,124578616 | 0,731403351  |
| Hmgb3    | 0,124596977 | -0,514352798 |
| Ppp2cb   | 0,124642409 | 0,608294169  |
| Mrpl37   | 0,124657017 | -0,439083735 |
| Cald1    | 0,124675488 | 2,121192296  |
| Emc8     | 0,124805016 | 1,059455872  |
| Minos1   | 0,125278195 | 2,142402013  |
| Pmpca    | 0,125553471 | -0,637946447 |
| Alox15   | 0,125554443 | 0,864356995  |
| MyI9     | 0,125633062 | 0,786079407  |
| Glrx3    | 0,1258175   | -0,351596832 |
| Ppm1a    | 0,125931293 | -0,553143183 |
| Mt1      | 0,126304619 | -1,72482427  |
| Ppp6r3   | 0,126450405 | -0,481657664 |
| Zcchc8   | 0,126533666 | -1,473697662 |
| Ntan1    | 0,126899813 | 1,165812174  |
| Nckap1l  | 0,126973209 | 1,526339213  |
|          | Sep-04      |              |
|          | 0,126978829 | -0,332975388 |
| Plscr1   | 0,127134328 | -0,607616425 |
| Ca1      | 0,127415786 | 2,695355733  |
| Cfl2     | 0,127530726 | 0,696044286  |
| Ctsa     | 0,12755528  | -0,663454692 |

Table S2.

|                 |             |              |
|-----------------|-------------|--------------|
| Gcsh            | 0,12782889  | -0,563891729 |
| Hsd17b8;H2-Ke6  | 0,127908189 | 0,721164068  |
| Oard1           | 0,128047088 | -1,866052628 |
| Pmvk            | 0,128467822 | 1,79498291   |
| Ifi205b;Ifi205a | 0,128525153 | -0,485136668 |
| Gzmb            | 0,128547368 | -0,687476476 |
| Ptk2b           | 0,128604052 | -0,288858414 |
| Ndr3            | 0,128619545 | -0,829418182 |
| Stub1           | 0,128638219 | 2,364429474  |
| Ttc27           | 0,128644444 | -1,65973409  |
| Parva           | 0,128669549 | 0,489562352  |
| Uqcrfs1         | 0,128683047 | 0,493347804  |
| Mrps22          | 0,128692972 | -0,422672272 |
| Rab5a           | 0,128698647 | -0,375459035 |
| Cd99            | 0,128736453 | 1,035401026  |
| Gja1            | 0,128749073 | 1,420127233  |
| Ubl7            | 0,128772363 | -0,52073733  |
| Fam3a           | 0,128777846 | 1,098450979  |
| Cog7            | 0,128815773 | -1,012372971 |
| Rbm22           | 0,128956468 | 1,277975082  |
| Htatsf1         | 0,128997549 | -0,621171951 |
| Krt23           | 0,129562768 | 1,423196793  |
| Tpk1            | 0,130174924 | -0,573333104 |
| Ddi2            | 0,130186047 | 1,833251953  |
| Prrc2a          | 0,130211362 | 0,662080765  |
| Mybbp1a         | 0,130220049 | -0,439235687 |
| Mrpl49          | 0,130320927 | -0,536677043 |
| Gm10639         | 0,130336996 | -1,133473078 |
| Aqp1            | 0,130609013 | -1,052455902 |
| Cct4            | 0,130688605 | -0,279613495 |
| Alyref          | 0,130736458 | 0,974545161  |
| Mrpl14          | 0,130768293 | 2,226870855  |
| Agps            | 0,130851582 | -0,512575785 |
| Fam195a         | 0,130981774 | 1,295087814  |
| Mfn1            | 0,131061398 | -1,300952276 |
| Pex26           | 0,131097635 | -2,013872782 |
| Lrpprc          | 0,131106796 | -0,35324351  |
| Ipo11           | 0,1311864   | -0,564427694 |
| Hspd1           | 0,131665455 | -0,296750387 |
| Pgap1           | 0,132089588 | 0,553303401  |
| Actr1b          | 0,132169594 | 0,920545578  |
| Vwa8            | 0,132263603 | -0,577835719 |
| Atp1b3          | 0,132343618 | 0,625834147  |
| Cpox            | 0,132357272 | -0,605166753 |
| Nae1            | 0,132437198 | -0,595383326 |
| Acin1           | 0,132454381 | 0,799924215  |
| Vapa            | 0,132615199 | 0,650423686  |
| Kif13b          | 0,133217601 | -0,622324626 |
| Commd1;Gm28048  | 0,133412048 | -1,128419876 |
| Dync1h1         | 0,133736303 | -0,362977346 |
| Prkcdbp         | 0,13378125  | 0,585568746  |
| Hdgf            | 0,133860409 | 0,350871404  |

Table S2.

|               |             |              |
|---------------|-------------|--------------|
| Zcchc6        | 0,133861696 | -1,176610311 |
| Atg5          | 0,134126126 | -0,525431315 |
| Sf3b1         | 0,134201681 | -0,462450663 |
| Cox6b1        | 0,134258993 | 0,283259074  |
| Pdhx          | 0,134265147 | -0,313009898 |
| Nupl1         | 0,134303176 | -0,71104304  |
| Slirp         | 0,134488623 | 0,555603027  |
| Luzp1         | 0,13470018  | -0,457849503 |
| Ube2m         | 0,134995816 | 0,839212418  |
| Wfs1          | 0,135051374 | -0,396208445 |
| Cryl1         | 0,135076555 | -0,706940333 |
| Nop2          | 0,135491343 | -0,456285477 |
| Uck1          | 0,135546539 | 0,857379278  |
| Clip2         | 0,13616935  | -0,426096598 |
| Krt14;Krt42   | 0,1362283   | -0,720375061 |
| Seh1l         | 0,13630934  | 1,573425929  |
| Tbl1xr1       | 0,136328767 | -1,099113464 |
| Sirpa         | 0,136390476 | -0,890323003 |
| Slc5a4a       | 0,136410012 | -2,90443484  |
| Atp13a1       | 0,136467933 | 0,468450546  |
| Rbmxl1;Rbmx   | 0,136527003 | 0,805331548  |
| Clta          | 0,13654902  | 1,263444265  |
| Actb          | 0,136652432 | 0,606267293  |
| Pcid2         | 0,136687204 | -1,020978928 |
| Pex11a        | 0,136768228 | -2,992007573 |
| Srrm2         | 0,136876258 | 1,187671661  |
| Suclg2        | 0,136929627 | -0,539364497 |
| Gata4         | 0,136995272 | 2,580486298  |
| Slc29a1       | 0,137010651 | -0,598936717 |
| Krt19         | 0,137304194 | -0,396555583 |
| Myo5c         | 0,137472566 | 0,661174774  |
| Galnt10       | 0,137525943 | -1,110596339 |
| Rps24         | 0,137553719 | 0,678986231  |
| Cyp2j6        | 0,137558044 | -0,767499924 |
| Sae1          | 0,137672556 | -0,344227473 |
| Ttc4          | 0,138015303 | -1,028274536 |
| Mcu           | 0,138127059 | -0,493385315 |
| Smc3          | 0,138271605 | -0,427903493 |
| Cyp4v2;Cyp4v3 | 0,138343126 | -1,23109436  |
| Trmt112       | 0,138353079 | -0,563233693 |
| Rtcb          | 0,138368545 | 0,510473251  |
| Snrpg         | 0,138388726 | -0,418886185 |
| Akap2;Pakap   | 0,138472173 | 1,140824636  |
| Cct2          | 0,138552647 | -0,414581299 |
| Trip11        | 0,138553341 | -0,505130132 |
| Fxn           | 0,138554133 | -0,683952332 |
| Sec24d        | 0,13855562  | -0,267794927 |
| Pex16         | 0,138636364 | -0,590126673 |
| Gda           | 0,138676744 | -0,570744832 |
| Pafah2        | 0,138717201 | -0,75302887  |
| Acaa1a        | 0,138745465 | -0,562837601 |
| Pa2g4         | 0,138775131 | 0,484883626  |



Table S2.

|                    |             |              |
|--------------------|-------------|--------------|
| Parp9              | 0,138798133 | -0,428059896 |
| Sec23b             | 0,138826698 | 0,539571126  |
| Nadk2              | 0,138854471 | -0,652941386 |
| Rbbp7              | 0,138857806 | 0,326527913  |
| Trim25             | 0,138879159 | -0,408983231 |
| Khk                | 0,138935673 | -0,402839661 |
| Mrps16             | 0,138938444 | -1,055700302 |
| Ndufc2             | 0,13896028  | 1,157982508  |
| Rps28;Gm10263      | 0,139269142 | 0,973885218  |
| Znf326;Zfp326      | 0,139366957 | -1,153343836 |
| Prps2              | 0,139440139 | -0,5146993   |
| Acbd3              | 0,139520833 | 0,356587092  |
| Dstn               | 0,139544509 | 0,535532633  |
| Fus                | 0,139601621 | 0,777434031  |
| Cnbp               | 0,139682503 | 1,211012522  |
| Unc45a             | 0,140136259 | -0,36472257  |
| Slc12a7            | 0,140217215 | -0,57794253  |
| Acy1               | 0,140364686 | 2,375192642  |
| Smad4              | 0,14050519  | -1,083786011 |
| Mtmr12             | 0,140901441 | 0,853798548  |
| Hist1h1b           | 0,141676454 | -0,644037247 |
| Smap;1110004F10Rik | 0,141707373 | 1,858599981  |
| Thoc7              | 0,141744534 | -0,369455973 |
| Txnip              | 0,142021852 | 2,152407964  |
| Ncf1               | 0,142570936 | 1,076073329  |
| Xpo7               | 0,142581609 | -0,564229965 |
| Sh3bgrl            | 0,142966705 | -0,400782903 |
| Ap3d1              | 0,143079748 | -0,56291453  |
| Cct8               | 0,143383028 | -0,381727854 |
| Dhrs7              | 0,143465903 | 0,677504857  |
| Ptrhd1             | 0,14366323  | -0,835269928 |
| Gls                | 0,144084717 | -0,580380758 |
| Itga5              | 0,14419189  | 0,725394567  |
| Rps10              | 0,144244851 | 0,636017481  |
| Tacc2              | 0,144274286 | -0,907762527 |
| Ndufaf1            | 0,144292739 | -0,458191554 |
| Slc3a1             | 0,144447489 | -0,901469549 |
| Ubr5               | 0,144499715 | -0,477948507 |
| Ap1s3              | 0,144551881 | -1,44691658  |
| Pex5               | 0,14462116  | -0,525147756 |
| Rabep2             | 0,144703472 | -0,62690417  |
| Trappc8            | 0,144785877 | -0,527493795 |
| Tsn                | 0,144809117 | -0,466665268 |
| Rheb               | 0,145220647 | -0,44887797  |
| Agmo               | 0,145265306 | -1,017875036 |
| Ssu72              | 0,145300739 | -0,649481455 |
| Ncbp1              | 0,145303065 | -0,430857976 |
| Slc37a4            | 0,145330312 | -1,451365153 |
| Thrap3             | 0,145385576 | 0,521596909  |
| Serpinb6b          | 0,145468182 | -1,599393845 |
| Raver1             | 0,145501699 | 0,772186279  |
| Tubb4b;Tubb4a      | 0,14571267  | 0,487578074  |

Table S2.

|                      |             |              |
|----------------------|-------------|--------------|
| Mrpl12               | 0,145795133 | -0,653169632 |
| Abcf1                | 0,145813273 | 0,605014801  |
| Acp2                 | 0,145869074 | -1,03071022  |
| Lcmt1                | 0,145885006 | -0,360371908 |
| Mospd2               | 0,145895329 | -2,832003911 |
| Sart3                | 0,145906162 | -0,423801422 |
| Lrrc40               | 0,145915398 | -0,649904251 |
| Rps8                 | 0,145918919 | 0,641868591  |
| Cald1                | 0,14595144  | 0,709085464  |
| Hars2                | 0,145963842 | -0,468784332 |
| Eif6                 | 0,146001127 | -0,417015076 |
| Chmp2a               | 0,146012339 | -0,321843465 |
| Rab35                | 0,146053812 | -0,685343424 |
| Ncln                 | 0,146055087 | -0,473000844 |
| Psmb5                | 0,146094276 | 1,37426885   |
| Mmaa                 | 0,146119101 | -0,477190653 |
| Nampt                | 0,146176305 | -0,460579554 |
| Plin2                | 0,146231933 | -1,261576335 |
| Cox6a1               | 0,146493013 | 0,77919515   |
| Mfap5                | 0,146505593 | 2,108736674  |
| Nat10                | 0,146524902 | -0,585000356 |
| Ivns1abp             | 0,146529609 | -1,667775472 |
| Tomm40               | 0,146606943 | 0,534812927  |
| Lsm7                 | 0,14678057  | -0,565715154 |
| Ppie                 | 0,147035714 | 1,06095314   |
| Drg1                 | 0,147087563 | 0,931218465  |
|                      | Mar-06      |              |
| Apex1                | 0,147440357 | -1,048596064 |
| Rfc4                 | 0,147721604 | -0,290024439 |
| Arg1                 | 0,147745961 | -0,449223836 |
| Arg1                 | 0,147993326 | 3,053967158  |
| Ctnn                 | 0,148017807 | 0,948539734  |
| Gm20390              | 0,148504725 | -0,591177622 |
| Sf1                  | 0,14856     | 0,499797821  |
| Por                  | 0,148790672 | -0,51140213  |
| Tax1bp3              | 0,148807543 | -0,7348423   |
| Cad                  | 0,148835457 | -0,496851603 |
| Copb1                | 0,148855876 | -0,476516724 |
| Ndufs6               | 0,148890122 | 1,961605072  |
| Ndufs4               | 0,149249169 | 1,063772202  |
| Snx18                | 0,149311222 | 1,940961838  |
| Gdpgp1               | 0,149333333 | -1,615386327 |
| Thoc2;BC005561       | 0,149340696 | -0,530437469 |
| Gpx1                 | 0,149361326 | -0,603849411 |
| Sec11c               | 0,149393805 | 1,257516861  |
| Tars2                | 0,14947648  | -0,348419189 |
| Gbp6;Gbp10;Gbp9;Gbp8 | 0,149932708 | -0,451723735 |
| Emd                  | 0,149969129 | 0,677202861  |
| Aldh9a1              | 0,15031405  | -0,449324926 |
| Sars                 | 0,150436123 | 0,745910009  |
| Serpina3k            | 0,150883875 | -0,837018331 |
| Aldob                | 0,151185919 | -0,452711741 |
| Ctps2                | 0,151474437 | -0,663551966 |

Table S2.

|                 |             |              |
|-----------------|-------------|--------------|
| Tspan31         | 0,152368825 | -0,721321106 |
| Hnrnpa0         | 0,152379178 | 0,9936409    |
| Cln6            | 0,152410313 | 1,587263743  |
| Scyl1           | 0,152452499 | -0,325190226 |
| Fscn1           | 0,152462719 | 1,951762517  |
| Col5a2          | 0,152468132 | 1,348860423  |
| Ifitm3          | 0,152577365 | 0,958793004  |
| Ovca2           | 0,152660832 | -0,499238332 |
| Emc6            | 0,152692223 | -0,65568161  |
| Slain2          | 0,15274439  | 2,255396525  |
| Top1            | 0,152928962 | -0,384894053 |
| Ehd4            | 0,153092299 | -0,281634649 |
| Arhgap5         | 0,153200873 | -0,445862452 |
| Rcn3            | 0,15350245  | 0,864425023  |
| Cstf2t          | 0,153529412 | -0,802832921 |
| Rab18           | 0,153613079 | 0,475618362  |
| Emc2            | 0,153624796 | 1,096565882  |
| Tyk2            | 0,153629226 | -0,675457637 |
| Fnta            | 0,15364539  | -0,429533641 |
| Macf1           | 0,153679522 | -0,516177495 |
| Adck3           | 0,153708379 | -1,644392649 |
| Dsg2            | 0,153713043 | 0,861834844  |
| Cstf2           | 0,153878393 | -1,168682734 |
| Crkl            | 0,154047568 | 0,541506449  |
| Isy1            | 0,154057328 | -0,342360179 |
| Dtx3l           | 0,154070232 | -0,612335841 |
| Krr1            | 0,154116631 | 2,000823339  |
| S100a9          | 0,154140693 | 1,441750209  |
| Ept1            | 0,154214787 | 1,831005096  |
| Mrpl38          | 0,154218123 | 0,486040751  |
| Lum             | 0,154224147 | -0,456639608 |
| Rnpep           | 0,15424607  | 0,314664841  |
| Cpped1          | 0,154257855 | -0,644292831 |
| Ddx5            | 0,154262473 | 0,763490041  |
| Inadl           | 0,154304207 | -0,89544932  |
| Ripk3           | 0,154330997 | 3,02634112   |
| Mad2l1          | 0,154635776 | 0,716028849  |
| Gnb2l1          | 0,154916532 | 0,647061666  |
| Dnaja2          | 0,154930032 | 0,577136358  |
| Mrps36          | 0,155147929 | 1,111392975  |
| Unc45a          | 0,155344086 | 1,180266062  |
| Raly            | 0,155369099 | -0,480824153 |
| Esr1            | 0,155392378 | -0,959260305 |
| Acp1            | 0,155475832 | -1,001078924 |
| Slc4a1ap        | 0,155519571 | -0,536327362 |
| Bag5            | 0,155559377 | -0,459982554 |
| Mthfd1          | 0,155826367 | -0,318770091 |
| Prkaa1          | 0,155931441 | -0,398400625 |
| Fadd            | 0,156408994 | -0,635123571 |
| Syp             | 0,156548267 | 1,467953364  |
| Ncam1           | 0,156579989 | -0,601860046 |
| Mup1;Mup15;Mup7 | 0,156616205 | 1,354317983  |

Table S2.

|                |             |              |
|----------------|-------------|--------------|
| Ahsa2          | 0,156631804 | -0,98633194  |
| Heph           | 0,156660256 | -0,540166855 |
| Hist1h1e       | 0,15671543  | 0,899380366  |
| Sifn9          | 0,156743987 | -1,598814646 |
| Bysl           | 0,15675508  | -0,820809682 |
| Dgat1          | 0,156762108 | 1,092007955  |
| Eps15l1        | 0,156779553 | -0,316523234 |
| Prosc          | 0,156797017 | 0,666436513  |
| Paics          | 0,157053191 | 0,971950531  |
| Wdr12          | 0,157305688 | -1,398464839 |
| Aspscr1        | 0,157409139 | -0,533413569 |
|                | 0,157523101 | -0,746117274 |
| Cox17          | 0,157728526 | -0,2872715   |
| Col1a2         | 0,157751592 | 1,392682393  |
| Ap1b1          | 0,157812202 | -0,386642456 |
| Ace2           | 0,158408055 | -0,568195979 |
| Arl6ip1        | 0,158473266 | -0,791077932 |
| Tmem263        | 0,158483342 | -0,512345632 |
| Cisd3          | 0,158485169 | 0,909111023  |
| Cnbp           | 0,158524313 | 1,175345103  |
| Safb2          | 0,158567196 | 0,571399689  |
| Tsr2           | 0,158889124 | -1,082153956 |
| Tceb2          | 0,158901215 | 0,563206991  |
| Mars2          | 0,158978364 | 1,008021673  |
| Txnl4a         | 0,159303797 | -0,541673024 |
| Rgn            | 0,159504742 | -0,875972748 |
| Myo5b          | 0,159520252 | -0,365937551 |
| Hypk           | 0,159534001 | 1,835825602  |
| Cox7b          | 0,159604211 | 0,697221756  |
| Mina           | 0,159688257 | 0,811063766  |
| Rbck1          | 0,159852787 | -0,669509888 |
| Ubqln2         | 0,160062959 | 0,862167358  |
| Ctsb           | 0,160088189 | 0,446951548  |
| Svs2           | 0,160172269 | 0,840315501  |
| Pold1          | 0,160232826 | -0,483897527 |
| Prkag1         | 0,160256437 | -0,555018743 |
| Khdrbs3        | 0,160528025 | 0,914218903  |
| Dag1           | 0,160612159 | -0,314909617 |
| Psm5           | 0,160975916 | -0,541102091 |
| Prpsap2        | 0,161157509 | -2,081785202 |
| Rcc1           | 0,161443515 | 1,252613068  |
| Ints6          | 0,161643492 | -0,602261861 |
| Hras;Nras      | 0,161826541 | -0,451751073 |
| Mtus1          | 0,162003133 | -0,567219416 |
| Tmbim6         | 0,162125261 | -0,607142131 |
| Cbr3           | 0,162136387 | -1,087269465 |
| Atp8b1         | 0,162220833 | -0,443770091 |
| Spns1          | 0,162254432 | 0,820916494  |
| Osbpl2         | 0,162275611 | -1,443174362 |
| Ugt1a6;Ugt1a6b | 0,162305367 | -1,977954229 |
| Abhd2          | 0,162339071 | -2,048220952 |
| Mmgt1          | 0,162360042 | 2,468734105  |

Table S2.

|          |             |              |
|----------|-------------|--------------|
| Noc2l    | 0,16249896  | -1,399019877 |
| Pik3c2a  | 0,162641039 | -0,569388707 |
| Ppp1r21  | 0,162803738 | 1,150258382  |
| Tmem205  | 0,16516805  | -0,697928747 |
| Srp14    | 0,165253762 | 2,402463913  |
| Snap47   | 0,165511664 | -0,524054845 |
|          | 0,165803109 | 0,88395373   |
| Prorsd1  | 0,166016563 | -0,425909042 |
| Gapvd1   | 0,166032108 | -0,53900973  |
| Serpinf2 | 0,166086867 | -0,692087809 |
| Mrpl39   | 0,16610124  | 0,401424408  |
| Cpne2    | 0,166172788 | -0,923247655 |
| Sptbn1   | 0,16618708  | -0,315935771 |
| Sord     | 0,1662754   | -0,875246684 |
| Txndc17  | 0,166313725 | -0,540587107 |
| Hpcal1   | 0,166399587 | -0,511194229 |
| Mbnl2    | 0,167490722 | 0,578716278  |
| Cse1l    | 0,167497166 | -0,414081573 |
| Mtfr1l   | 0,167653965 | 2,390890121  |
| Smpd4    | 0,168323212 | -0,834771474 |
| Actg2    | 0,168446502 | 0,844376882  |
| Ykt6     | 0,169277121 | 0,644510905  |
| Lace1    | 0,169923947 | 0,594984055  |
| Rpap3    | 0,170778234 | 0,766570409  |
| Tmx2     | 0,170865948 | 0,278821309  |
| Stxbp3   | 0,171282051 | -0,396540324 |
| Dock5    | 0,171369933 | -0,529786428 |
| Scamp2   | 0,17138083  | 0,955063502  |
| Eif4h    | 0,171518443 | 0,652472814  |
| Glipr2   | 0,17190179  | 1,185730616  |
| Dctn1    | 0,171903738 | -0,309975942 |
| Snrpf    | 0,171916198 | -0,570879618 |
| Kank2    | 0,171940695 | 0,447851181  |
| Gdi1     | 0,171942682 | 0,453615189  |
| Rars     | 0,171995914 | -0,358697255 |
| Mgea5    | 0,172081674 | 1,551549911  |
| Ptges2   | 0,17234898  | 0,39522934   |
| Ggt5     | 0,172416793 | 0,572982788  |
| Ppa2     | 0,172427263 | -0,457450231 |
| Cope     | 0,172440592 | 0,452314377  |
| Wdr1     | 0,172471784 | -0,354417165 |
| Apoh     | 0,172504049 | 0,673933029  |
| Afg3l2   | 0,172515013 | -0,376624425 |
| Des      | 0,172560162 | 0,586015066  |
| Fbl      | 0,172591392 | 0,401625315  |
| Spag7    | 0,172602851 | -0,569842656 |
| Tfam     | 0,172676426 | 0,436976115  |
| Ogdh     | 0,172678825 | 2,170717875  |
| Cml5     | 0,172690779 | -1,202245076 |
| Anxa7    | 0,17275813  | -0,394720713 |
| Pabpc1   | 0,172760848 | 0,416613261  |
|          | 0,172763636 | 2,102956772  |

Table S2.

|               |             |              |
|---------------|-------------|--------------|
| Prkg2         | 0,172766346 | -0,807451884 |
| Stat2         | 0,172778797 | 1,326474508  |
| Rdh11         | 0,172793156 | -0,503807704 |
| Tapbpl        | 0,172794341 | 1,387759527  |
| Eif3j1;Eif3j2 | 0,17279716  | 0,448071162  |
| Slc35b2       | 0,172823766 | 1,703018824  |
| Alg5          | 0,172843058 | 0,612965266  |
| Hexim1        | 0,17288483  | 1,10334905   |
| Snrpd2;Gm5449 | 0,172910831 | -0,496614456 |
| Rbm17         | 0,172930653 | 0,452008565  |
| Hp1bp3        | 0,172971342 | -0,400351842 |
| Kiaa0195      | 0,172972589 | -1,928295771 |
| Ank3          | 0,172997984 | 0,491716385  |
| Inpp4a        | 0,173026727 | -0,537567139 |
| Atp5c1        | 0,173060437 | 0,342967987  |
| Krt7          | 0,173066265 | 0,559059779  |
| Krt4          | 0,173100954 | -1,467131933 |
| Tmem245       | 0,173461114 | -1,623416901 |
| Ubp2l         | 0,173527054 | 1,618247986  |
| D8Erttd738e   | 0,17353661  | 1,166692734  |
| Spata5        | 0,173548322 | -0,807877858 |
| Pdzd11        | 0,173561905 | -1,736353556 |
| Lbr           | 0,173784    | 0,556893667  |
| Mien1         | 0,173821822 | -0,540363312 |
| Lrba          | 0,173870935 | -0,363929113 |
| Atg4a         | 0,173953023 | -0,965703328 |
| Tmem236       | 0,174160759 | -1,500962575 |
| Matr3         | 0,174247752 | 0,359006246  |
| Magt1         | 0,174253493 | -0,456579208 |
| Aldh1b1       | 0,174596911 | -0,393057505 |
| Cbx5          | 0,174667331 | -0,538286845 |
| Acox1         | 0,174683948 | -0,592526754 |
| Calu          | 0,174715212 | 0,537981669  |
| U2surp        | 0,174879841 | -0,36983935  |
|               | 0,174966716 | -0,703337351 |
| Mtnd5         | 0,174989055 | 0,554021835  |
| Map2k2        | 0,175018417 | -0,473398844 |
| Atp2b1        | 0,175053678 | -0,409047445 |
| Acat2;Acat3   | 0,175079065 | -0,315706889 |
| Mrpl11        | 0,176059553 | -0,550404231 |
| Igha          | 0,176230159 | -0,466737111 |
| Actr1a        | 0,176440258 | 0,283084869  |
| Dnttip2       | 0,176864222 | 0,715912501  |
| Fam160b1      | 0,177022288 | -0,493464152 |
| Glod4         | 0,177970297 | -0,261442184 |
| Irgm1         | 0,178335477 | -0,556690852 |
| Ctu1          | 0,178354105 | 1,108058294  |
| Zzef1         | 0,178442688 | -0,517372131 |
| Ctps1         | 0,178481737 | -0,262980779 |
| Fam134c       | 0,178485418 | 1,402772903  |
| Atox1         | 0,178506167 | -0,776582082 |
| Filip1l       | 0,178512315 | 0,797676722  |

Table S2.

|                   |             |              |
|-------------------|-------------|--------------|
| Cops3             | 0,178527764 | -0,436524073 |
| Atp6v0d1          | 0,178536681 | -0,432372411 |
| Ptgs1             | 0,178560158 | 0,453626633  |
| Csf1r             | 0,178564405 | -0,507488251 |
| Eef1d             | 0,178569877 | 0,615591049  |
| Slc25a13          | 0,178591244 | -0,573279699 |
| Prpf38a           | 0,178600296 | 0,461562475  |
| Ywhae             | 0,178679134 | 0,462231954  |
| Ogt               | 0,178882671 | -0,606742859 |
| Arpc1a            | 0,17897053  | 0,529886246  |
| Stam              | 0,179436979 | -0,542482376 |
| Fkbp1a            | 0,179458292 | 0,674420675  |
| MacroD1           | 0,179531373 | 0,63720576   |
| Igfbp7            | 0,179631553 | 1,564632416  |
| Dscr3             | 0,179774951 | -0,440521876 |
| Esrp1             | 0,179816227 | -0,579491933 |
| Acy1              | 0,179862947 | -0,473136902 |
| Rbm25             | 0,179904156 | -0,263462702 |
| Tradd             | 0,179951028 | -0,535287221 |
| Usp7              | 0,180084025 | -0,437536875 |
| Dcn               | 0,1807255   | -0,399888357 |
| Col4a2            | 0,180730112 | 0,753153483  |
| Atp5b             | 0,180813659 | 0,303576152  |
| Gap43             | 0,180818359 | -0,539993922 |
| Nceh1             | 0,180931774 | -0,980795542 |
| Lym5              | 0,181148978 | -0,833658218 |
| Rrp1              | 0,181192401 | -0,943290075 |
| Ica;1300017J02Rik | 0,181204866 | -0,523423513 |
| Ssr4              | 0,181366375 | 1,344140371  |
| Mapre3            | 0,181454545 | 1,286968867  |
| Mrpl17            | 0,181458961 | -0,607662201 |
| Pygl              | 0,18148249  | 0,422458649  |
| Actn4             | 0,181970874 | -0,301383972 |
| Luc7l3            | 0,182068899 | 0,411223729  |
| Ezr               | 0,182286822 | 0,404394786  |
| Tnc               | 0,182375182 | -0,383942286 |
| Rnf213            | 0,182413191 | -0,270584106 |
| Lamp2             | 0,182615682 | -0,482463837 |
| Gopc              | 0,182643445 | -0,457569758 |
| Mtnd1             | 0,182647942 | 1,414972941  |
| Rabif             | 0,183046422 | 1,920131683  |
| Exosc1            | 0,183702415 | 0,958888372  |
| Fgl2              | 0,183791203 | -0,733884811 |
| Spcs1             | 0,184225978 | 0,983385722  |
| Phka1             | 0,185546332 | -0,800703049 |
| Akap13            | 0,18602219  | 1,955973307  |
| Cnm4              | 0,186484089 | -0,591108322 |
| Faah              | 0,186527938 | -0,494171143 |
| Gstm1             | 0,186617831 | -0,870262146 |
| Slc15a1           | 0,186906115 | -0,566476186 |
| Acad11            | 0,187035611 | -0,550643285 |
| Mrto4             | 0,187126923 | -0,403546651 |

Table S2.

|                     |             |              |
|---------------------|-------------|--------------|
| Slc35a3             | 0,187216931 | 0,440120061  |
| Cd44                | 0,187965401 | 0,508326213  |
| Bcl2l13             | 0,188335249 | 0,470410665  |
| Man2b2              | 0,188366076 | -0,894058228 |
| Arpin               | 0,188370797 | 0,890327454  |
| Hnrnpm              | 0,188425084 | 0,604629517  |
| Ckmt1               | 0,188448921 | 0,397277832  |
| Psmd7               | 0,188449761 | -0,480131785 |
| Hmcn2               | 0,188456376 | 1,033754985  |
| Pik3r1              | 0,188474088 | -0,402128855 |
| Eps8l3              | 0,188505041 | -0,553450902 |
| Gps2                | 0,188669216 | -0,615368525 |
| Psme4               | 0,188700143 | -0,505460739 |
| Gpr107              | 0,188746896 | -0,539405187 |
| Prkcsh              | 0,188837076 | -0,31480662  |
| Tmed4               | 0,188885919 | -0,304066976 |
| Mcm6                | 0,189017176 | -0,364230474 |
| Lmcd1               | 0,189088137 | 0,897514343  |
| Cotl1               | 0,189134414 | 0,681480408  |
| Acp1                | 0,189175012 | -0,358695984 |
| Gipc2               | 0,189226667 | -0,615635554 |
| Fmo4                | 0,189300333 | -0,981946309 |
| Twf2                | 0,18934855  | 0,281836828  |
| Anp32b              | 0,18943863  | -0,413659414 |
| Tle3;Tle2;Tle1;Tle4 | 0,189528517 | 0,770771027  |
| Ddx18               | 0,189681214 | -0,357302984 |
| Vbp1                | 0,189700474 | 0,816848119  |
| Ipo8                | 0,189712387 | -1,058867772 |
| Wdr33               | 0,189790422 | -0,461559931 |
| Eppk1               | 0,189802469 | -0,257092794 |
| Kng1                | 0,189892637 | -0,525932948 |
| Rpl19               | 0,190268119 | 0,420058568  |
| Zpr1                | 0,19075947  | -0,675397873 |
| Tufm;Gm9755         | 0,190870344 | 0,434827169  |
| Rplp1               | 0,190898441 | 1,065474828  |
| Dcps                | 0,190915958 | -0,372625351 |
| Lgals4              | 0,190927796 | -0,478736877 |
| Stmn2               | 0,190960377 | -1,632350922 |
| Rpl3                | 0,190988658 | 0,613985697  |
| Slc25a1             | 0,190991008 | -0,584951401 |
| Prkaca              | 0,191072848 | -0,380151749 |
| Serhl               | 0,19107896  | -0,892344793 |
| Gmfb                | 0,191234684 | 1,822582881  |
| Tmem30a             | 0,19158926  | -0,512310028 |
| Zbp1                | 0,192035782 | -0,959249496 |
| Vps13c              | 0,192372706 | 1,998607635  |
| Atp5a1              | 0,192933208 | 0,209203084  |
| Pkn2                | 0,193082707 | -1,760374705 |
| Cd82                | 0,193173484 | -0,733410517 |
| Ctage5              | 0,193981291 | -0,451754888 |
| Uqcr11              | 0,193995303 | 3,855166753  |
| Ptrh2               | 0,194017782 | 1,087633133  |



Table S2.

|                 |             |              |              |
|-----------------|-------------|--------------|--------------|
| Ubtf            | 0,194065543 | -0,514554342 |              |
| Tmx3            | 0,19409274  | -0,405334473 |              |
| Naa25           | 0,194173832 | -0,387158712 |              |
| Tubal3          | 0,19417909  | -0,74682045  |              |
| Hk1             | 0,194183693 | 0,245227178  |              |
| Nup93           | 0,194195236 | -0,32187144  |              |
| Atp1b1          | 0,194222222 | -0,364557902 |              |
| Xpot            | 0,194251866 | -2,070643107 |              |
| Gtf2h4          | 0,19426461  | -0,406532923 |              |
| Rrp12           | 0,194270169 | -0,617179235 |              |
| Rab3gap1        | 0,194276408 | 0,563587189  |              |
| Gdi2            | 0,19429398  | 0,404071808  |              |
| Stip1           | 0,194294747 | -0,33690834  |              |
| Hdgfrp2         | 0,194301115 | -0,352617264 |              |
| Rtn3            | 0,194311737 | -0,588523229 |              |
| Cdc73           | 0,194314219 | 0,371459325  |              |
| Ddx17           | 0,194331163 | 0,323741277  |              |
| Anks4b          | 0,194345599 | -0,592212041 |              |
| Emp2            | 0,194361333 | -0,949911118 |              |
| Atad1           | 0,194366853 | -0,402984619 |              |
| Dkc1            | 0,19443616  | -0,388453166 |              |
| Rpl37a          | 0,194446818 | 0,94740804   |              |
| Ephx2           | 0,194485383 | -0,508307139 |              |
| Agpat9          | 0,194575673 | -0,556706111 |              |
| Dnajc1          | 0,195482375 | 1,512189865  |              |
| Shpk            | 0,195647659 | -0,734647115 |              |
| Gfer            | 0,195759148 | -0,871539434 |              |
| Nfs1            | 0,19578684  | 0,815840403  |              |
| Uap1            | 0,195857473 | -0,366721471 |              |
| Tmem43          | 0,195864815 | 0,546938578  |              |
| Acsl5           | 0,19613136  | 0,428005219  |              |
| Ranbp10         | 0,196146093 | -0,75598526  |              |
| Tppp3           | 0,196327172 | 0,592809677  |              |
| Sf3b2           | 0,196480148 | -0,344851176 |              |
| Creb1;Crem;Atf1 | 0,196570901 | -0,510410945 |              |
|                 | Sep-07      | 0,196822499  | -0,185284297 |
| Sdpr            | 0,196862021 | -0,333073934 |              |
| Pfdn5           | 0,196882543 | -0,440758387 |              |
| Rfc5            | 0,196913284 | 0,878137589  |              |
| Arf4            | 0,196930876 | -0,517535528 |              |
| Got2            | 0,197053407 | 0,36575826   |              |
| Shmt2           | 0,197491026 | -0,551810582 |              |
| Tnpo3           | 0,197529412 | -0,459344228 |              |
| Sts             | 0,19762023  | 0,929374059  |              |
| Spint2          | 0,197644465 | 0,572351456  |              |
| Ehd1            | 0,197670653 | -0,48837471  |              |
| Taf6            | 0,197954128 | -0,984659831 |              |
| Prelp           | 0,197959596 | -0,368806839 |              |
| Gatb            | 0,197966071 | -0,445896149 |              |
| Csnk1d;Csnk1e   | 0,197988068 | 0,36490949   |              |
| Hnrnpk;Gm7964   | 0,198047663 | 3,404436111  |              |
| Serpina1b       | 0,198512821 | -0,395775477 |              |

Table S2.

|                   |             |              |
|-------------------|-------------|--------------|
| Arhgef1           | 0,198556115 | -0,360075633 |
| Pbld1             | 0,198910755 | -0,964968363 |
| Pfkl              | 0,198975297 | -0,377340317 |
| Sec24b            | 0,199513933 | 0,359002431  |
| Dctn4             | 0,199548446 | -0,324565887 |
| Park7             | 0,199588477 | 0,480496089  |
| Eci2              | 0,200195434 | -0,60060819  |
| Acadm             | 0,200359325 | -0,566084544 |
| Cpsf2             | 0,200388864 | -0,363353729 |
| Ap3b1             | 0,200399635 | -0,298266729 |
| Mgat3             | 0,200685506 | -0,735612869 |
| Armc6             | 0,200687016 | -0,521924337 |
| Etl4;Skt          | 0,200876138 | -0,44490242  |
| Rab21             | 0,201665908 | 0,726877848  |
| Rbbp6             | 0,201969063 | 0,375862757  |
| Myh10             | 0,202058182 | -0,36836942  |
| Stk24             | 0,202079055 | -0,318947474 |
| Trappc1           | 0,202105359 | -0,554681142 |
| Hmga1             | 0,202150068 | 0,831110001  |
| Snw1              | 0,202546279 | 0,483133316  |
| Rps17             | 0,202591012 | 0,466303507  |
| Mylk              | 0,202608617 | 0,427233378  |
| Gstt2             | 0,203341795 | -0,539072673 |
| Copg2             | 0,203626643 | -0,371735255 |
| Atxn7l3b          | 0,203992754 | 0,911068598  |
| Ddx3x             | 0,204764147 | 0,31795756   |
| Trip12            | 0,205422624 | 0,939259211  |
| Dnpep             | 0,205438263 | -0,557763418 |
| Uba7              | 0,205448463 | -0,472358704 |
| Acsl3             | 0,205686399 | 0,4057223    |
| Ubqln1            | 0,206031603 | -0,367830912 |
| Spr               | 0,20603252  | 0,394016902  |
| Brd2              | 0,206050542 | -0,579985301 |
| Rabgap1l          | 0,2062553   | -0,673763275 |
| Ddx19a;Ddx19b     | 0,206301172 | -0,329678853 |
| Ctsz              | 0,206386661 | -0,51236852  |
| Ggact             | 0,206636036 | 1,169942856  |
| Srpk1             | 0,206885187 | -0,931568782 |
| Bax               | 0,207164716 | -0,302691142 |
| Map1lc3a;Gm5612   | 0,207198562 | 0,316529592  |
| Stx17             | 0,207210787 | -0,436751684 |
| Igkv4-55;Igkv4-72 | 0,20721868  | -1,634403865 |
| Abhd14b           | 0,207233468 | 2,777832667  |
| Abracl            | 0,207251799 | 0,42688179   |
| Cstf3             | 0,207287892 | -0,554499308 |
| Ube2z             | 0,207380888 | 1,660497665  |
| Ubr2              | 0,207447781 | 1,940303802  |
| Dcakd             | 0,207473968 | -0,635365804 |
| Gsn               | 0,208958781 | 0,80144755   |
| Rbbp5             | 0,20925571  | -0,872562408 |
| Mgl2              | 0,209416294 | 0,789265315  |
| Tmem33            | 0,209748546 | -0,537986755 |

Table S2.

|                 |             |              |
|-----------------|-------------|--------------|
| Gmppb           | 0,209817531 | 0,397628784  |
| Sacm1l          | 0,209891819 | 0,293787638  |
| Smc2            | 0,210293119 | -0,348091125 |
| Pdcd10          | 0,210370701 | -0,687270482 |
| Mrpl22          | 0,210433929 | -1,787916819 |
| Fam3b           | 0,210909415 | -0,807376226 |
| Wwp1            | 0,210966994 | 1,196022669  |
| Mcf2            | 0,211283103 | 2,653294881  |
| Erp44           | 0,211513369 | 0,489994685  |
| Ftsj3           | 0,21162244  | -0,674861908 |
| Pnpt1           | 0,211666815 | -0,411184311 |
| Ak2             | 0,211674232 | -0,291634878 |
| Ttc38           | 0,212259671 | -0,37491099  |
| Dut             | 0,212298932 | 0,766139984  |
| Utrn            | 0,212630831 | -0,239918391 |
| Rbp7            | 0,212631111 | -0,503096263 |
| Tpm1            | 0,213383659 | 1,48227946   |
| Osbpl3          | 0,213450998 | -0,909954071 |
| Taok3           | 0,213499556 | -0,392705282 |
| Gtf2f1          | 0,213544607 | 0,776956558  |
| Hspg2           | 0,213942452 | 0,254210154  |
| Srp9            | 0,213996457 | 0,813991547  |
| Ndufa10         | 0,214035461 | 0,274827321  |
| Mrps31          | 0,214091272 | -0,609757106 |
| Srsf3;Gm12355   | 0,21459823  | 0,409957886  |
| Adck5           | 0,214690845 | -0,336438497 |
| Ttc19           | 0,214788683 | 1,235665639  |
| Vkorc1          | 0,215202828 | 0,811361313  |
| Slc25a35        | 0,215475265 | 1,05603536   |
| Tcp1            | 0,215506825 | -0,290185293 |
| Cystm1          | 0,215588884 | 2,320989609  |
| Apool           | 0,215601762 | 0,574205399  |
| Cldn15          | 0,215633157 | -0,877599716 |
| Dpp3            | 0,21564519  | -0,232116699 |
| Slc26a6         | 0,215647422 | -0,40688324  |
| Dock11          | 0,215740397 | -1,474538167 |
| Tbk1            | 0,216448336 | -0,533508937 |
| Spryd4          | 0,216543145 | -0,619378408 |
| Slc2a2          | 0,216605101 | -0,668169657 |
| Idh3b           | 0,216638037 | 0,233969371  |
| Gm6576          | 0,216639438 | 1,693155924  |
| Eci3            | 0,216640563 | -1,317058563 |
| Mboat7          | 0,216681338 | -0,471186956 |
| Trim30d;Trim30a | 0,216687418 | 2,210697174  |
| Ptgr1           | 0,21672967  | -0,441855113 |
| Nit1            | 0,216734622 | -0,473457336 |
| Gfpt1           | 0,216767003 | -0,339558283 |
| Txndc5          | 0,216782456 | 0,571606318  |
| Gm561           | 0,21686216  | -0,687746048 |
| Spint1          | 0,216937883 | 0,984708786  |
| Smim20          | 0,216973304 | 1,185278575  |
| Raly            | 0,217348491 | 0,54111735   |

Table S2.

|                   |             |              |
|-------------------|-------------|--------------|
| Tpi1              | 0,217520979 | 0,202467601  |
| Scgn              | 0,217662882 | -1,593987783 |
| Son               | 0,217757973 | 0,782320023  |
| Pdcl              | 0,218283719 | 0,939470291  |
| Ganab             | 0,218352531 | -0,437586466 |
| Cela1             | 0,218740515 | 1,59322993   |
| Col5a1            | 0,21899041  | 1,303965251  |
| Kdm1a             | 0,219038328 | -0,448823929 |
| Acot8             | 0,219133769 | 1,010247548  |
| Vps35             | 0,219277318 | -0,416994095 |
| Dars2             | 0,219528285 | -0,559652964 |
| Dnajb4            | 0,219874728 | -0,288016637 |
| Gm5435;Gtf2a1     | 0,219907826 | 1,278003693  |
| Tomm20            | 0,220281494 | 1,349526723  |
| Usp3              | 0,220377227 | -0,347284953 |
| Dync1li2          | 0,220519323 | 0,561911265  |
| Exosc9            | 0,220944444 | -0,407429377 |
| Sugt1             | 0,221938395 | 0,339570999  |
| Hnrnpdl           | 0,222560278 | 0,520953496  |
| Dnajc11           | 0,223193758 | -0,387906392 |
| My112b            | 0,223308492 | 0,669055939  |
| Slc2a4            | 0,223320918 | 0,820553462  |
| Atp6ap2           | 0,223548052 | 1,407445908  |
| Reep3             | 0,223608827 | -0,440791448 |
| Rfc2              | 0,223814879 | -0,401702245 |
| Ptpn23            | 0,223851275 | -0,383514404 |
| Dopey2            | 0,224058773 | -0,528994242 |
| Snrpb2            | 0,224074234 | 0,417095184  |
| Osbpl11           | 0,224170984 | -1,093257268 |
| Atp8a1            | 0,224236411 | 1,542985916  |
| Ocln              | 0,224267819 | 0,805562337  |
| Mdm4              | 0,224670112 | -0,688812256 |
| Ddx20             | 0,224766911 | -0,472040812 |
| Nrf1              | 0,224815517 | -1,16467158  |
| Scrn2             | 0,224853816 | -0,59797287  |
| Ckm               | 0,225124408 | 0,696975708  |
| Cuzd1             | 0,226095484 | 2,276081721  |
| Selenbp1;Selenbp2 | 0,226134251 | -0,41798528  |
| Lyar              | 0,226493551 | 0,334444682  |
| Itgb6             | 0,226827675 | -0,865882238 |
| Aars2             | 0,228819588 | 1,291695913  |
| Focad             | 0,22923143  | -0,766471227 |
|                   | 0,229244101 | -1,698924383 |
| Dhrs7b            | 0,22928927  | -0,270725886 |
| Tpm1              | 0,229466552 | -0,562372843 |
| Ltn1              | 0,229696918 | -0,702369054 |
| Mapk1             | 0,229795289 | -0,316687266 |
| Mthfsl;Mthfs      | 0,229844835 | -0,82117335  |
| Slc7a8            | 0,229849186 | -0,438567479 |
| Atad2b            | 0,230368849 | -0,695737203 |
| C1galt1c1         | 0,230516681 | -0,546608607 |
| Srxn1             | 0,230556648 | 1,634991964  |

Table S2.

|                                       |             |              |
|---------------------------------------|-------------|--------------|
| Vamp3;Vamp2                           | 0,230653009 | 0,606108348  |
| Igkv8-28                              | 0,230742418 | -1,493553797 |
| Defa8;Defa3;Defa10;Defa16;Defa13;Defa | 0,230751494 | 1,401801427  |
| Alcam                                 | 0,230841026 | -0,445762634 |
| Tspan8                                | 0,230986348 | -0,380690257 |
| Ghitm                                 | 0,231186701 | 0,683356603  |
| Ces1c                                 | 0,231237527 | -0,660840352 |
| Rbp2                                  | 0,231394972 | 0,417794545  |
| Tmem176b                              | 0,231582624 | -0,483836492 |
| Tm9sf1                                | 0,23212415  | 0,316283544  |
| Slc37a2                               | 0,232215803 | -3,306381226 |
| Sult2b1                               | 0,232217595 | 0,476437887  |
| Rbm26                                 | 0,232222884 | -0,429676056 |
| Pld3                                  | 0,232321702 | 0,995019277  |
| Znf598                                | 0,232338868 | -0,425584157 |
| Xpo5                                  | 0,232346497 | -0,348199209 |
| Ash2l                                 | 0,232521001 | -0,439509074 |
| Wdr45b                                | 0,232543294 | -0,475081126 |
| Vat1                                  | 0,23293469  | -0,201779683 |
| Acadvl                                | 0,232973294 | -0,342283885 |
| Itm2b                                 | 0,233011864 | -0,821178436 |
| Hnrnpab                               | 0,233829733 | 0,577787399  |
| Slc44a1                               | 0,233933136 | -0,462706248 |
| Cobll1                                | 0,233984759 | 0,936970393  |
| Wdr92                                 | 0,234370558 | 0,949680328  |
| Pcyox1l                               | 0,234851586 | 2,421410878  |
| Ccdc115                               | 0,235634827 | -1,291223526 |
| Nagpa                                 | 0,235807432 | -1,614029566 |
| Lyn                                   | 0,235859738 | 0,424267451  |
| Myo1e                                 | 0,235994935 | -0,392948786 |
| Bcar1                                 | 0,236038819 | -0,885009766 |
| Ldlr                                  | 0,236328975 | 1,96942838   |
| Tsfm                                  | 0,23651602  | -0,347230911 |
| Golga7                                | 0,236726507 | -0,595375697 |
| Ppia                                  | 0,237142376 | 0,495295207  |
| Eif3e                                 | 0,237254737 | -0,391462326 |
| Gstz1                                 | 0,237586207 | -0,571828842 |
| Hmgb1                                 | 0,237600337 | -0,329223633 |
| Golim4                                | 0,237618487 | -0,596333186 |
| Nt5c3a                                | 0,237648148 | -0,332932154 |
| Cyc1                                  | 0,237718369 | -0,305065155 |
| Psm13                                 | 0,237880772 | -0,372053782 |
| 2310035C23Rik;Kiaa1468                | 0,23789509  | 2,134452184  |
| Ndufv3                                | 0,237937001 | 0,892185847  |
| Lmf2                                  | 0,238389262 | 0,784088771  |
| Cnih4                                 | 0,238642079 | 0,894273758  |
| Pon2                                  | 0,238651572 | -0,375291189 |
| Ak1                                   | 0,239033096 | 0,474265416  |
| Rab27a                                | 0,239680067 | 0,389469147  |
| Muc3                                  | 0,240075345 | -0,703751882 |
| Fah                                   | 0,240324686 | 1,385491689  |
| Rps15a                                | 0,240610623 | 0,47100385   |

Table S2.

|               |             |              |
|---------------|-------------|--------------|
| Ypel5         | 0,240961137 | 0,813768387  |
| Pygb          | 0,240963211 | 0,227432251  |
| Pgm5          | 0,241040936 | 0,477821986  |
| Mrpl50        | 0,241070564 | -1,052366892 |
| Pak2          | 0,241358932 | -0,305338542 |
| Ndufb10       | 0,241435127 | 0,339796066  |
| Thop1         | 0,24146789  | -0,458719889 |
| Smarcb1       | 0,242121667 | -0,443809509 |
| Iws1          | 0,242165902 | -0,46747462  |
| Hn1l;AY358078 | 0,242302122 | 0,926937103  |
| Sec24c        | 0,242305706 | -0,365561167 |
| Pfas          | 0,242346378 | 0,336704254  |
| Atp5j2        | 0,243024106 | -0,539394379 |
| Tmod1         | 0,243076539 | -0,49899737  |
| Sycn          | 0,243078586 | 1,713021596  |
| Ikbkap        | 0,243099294 | -0,320503871 |
| Nup153        | 0,243350498 | 1,410044988  |
| Sf3a1         | 0,243479702 | -0,326118469 |
| Rpl22         | 0,243580605 | 0,499446869  |
| Ccdc86        | 0,243605307 | -0,579332987 |
| Esd           | 0,243642236 | -0,500057856 |
| Tyms          | 0,2436978   | 1,750325521  |
| Cand1         | 0,243706346 | -0,253514608 |
| Rps6ka4       | 0,243807469 | -0,38849322  |
| Sp100         | 0,243877483 | -0,367430369 |
| Chtop         | 0,243940471 | 0,713581721  |
| Mrpl53        | 0,243978521 | 0,510592779  |
| Letm1         | 0,244033058 | 0,345259349  |
| Drap1         | 0,244041356 | -0,568508784 |
| Slc25a3       | 0,244142325 | 0,375460307  |
| Psmc5         | 0,244422442 | -0,242179235 |
| Ltbp4         | 0,2444327   | 1,614152908  |
| Setd3         | 0,244523318 | -0,275801341 |
|               | 0,244791753 | -0,685417175 |
| Cnot6l        | 0,245502061 | -0,843623479 |
| Atp6v1c1      | 0,245722291 | -0,334555944 |
| Tap1          | 0,245891269 | -0,472349803 |
| Synj2bp       | 0,245911898 | -0,625501633 |
| Plbd2         | 0,245955556 | -0,417612076 |
| Itga6         | 0,24603125  | -0,213846842 |
| Ormdl2        | 0,246076512 | 0,720030467  |
| Akap12        | 0,24626716  | 0,387919744  |
| Man2c1        | 0,246366475 | -0,541002274 |
| Npc1          | 0,246444353 | -1,603766123 |
| Fndc3a        | 0,246714813 | 0,717153549  |
| Cdk5          | 0,246778325 | -0,483435949 |
| Golga3        | 0,246835111 | -0,528901418 |
| Atg3          | 0,247589996 | -0,330260595 |
| Aldh1a7       | 0,247909836 | -1,222867966 |
| Chchd2;Zbed5  | 0,248315102 | 0,936972936  |
| Mpp7          | 0,248342997 | 0,654314041  |
| Slc1a5        | 0,248444444 | 1,989796321  |

Table S2.

|               |             |              |
|---------------|-------------|--------------|
| Ctnnb1        | 0,248451349 | -0,396458308 |
| Pgam5         | 0,2484953   | 1,241404215  |
| Eif4a3;Gm8994 | 0,248502249 | -0,382531484 |
| Ints7         | 0,248520458 | 0,698108673  |
| Vim           | 0,248530713 | 0,550479889  |
| Morf4l1       | 0,248535407 | 0,447120031  |
| Gimap4        | 0,248580987 | -0,464768092 |
| Ggps1         | 0,248581729 | -1,148146311 |
| Apoe          | 0,248797716 | -0,475467682 |
| Ogdh          | 0,248843049 | 0,315910339  |
| Wdr26         | 0,249281174 | -0,554292043 |
| Mrps10        | 0,249373523 | -0,444949468 |
| Aqp7          | 0,249579805 | 1,441319784  |
| Dnm1          | 0,250304312 | -0,398976644 |
| Tuba1b        | 0,250347296 | 0,371590932  |
| Dhcr7         | 0,250406186 | -0,360079447 |
| Map2k3        | 0,250422764 | -0,368429184 |
| Sdsl          | 0,25140512  | 0,328702927  |
| Serping1      | 0,251465692 | -0,515805562 |
| Prrc2c        | 0,251530463 | 0,43488884   |
| Slc2a5        | 0,251561688 | -0,527505875 |
| Mcur1         | 0,251985396 | -1,028390249 |
| Nipbl         | 0,252422843 | -0,44400088  |
| Gm15284       | 0,252425911 | 2,268710454  |
| Hint1         | 0,252474878 | 0,898614883  |
| Mrps26        | 0,252532036 | -0,669977188 |
| Hsp90ab1      | 0,252535063 | -0,285437266 |
| Rnf40         | 0,252770538 | 1,375888189  |
| Bid           | 0,253176375 | -1,913012822 |
| Mtmr1         | 0,253266478 | -1,578139623 |
| Pddc1         | 0,25352404  | 1,001625061  |
| Dhrs3         | 0,253626516 | -1,154297511 |
| Myh11         | 0,2536956   | 0,483268738  |
| Gamt          | 0,253798061 | 2,948013306  |
| Gcdh          | 0,25434544  | -0,411020915 |
| Hspa8         | 0,254347721 | -0,215502421 |
| Commd4        | 0,2546      | 0,54239591   |
| Plrg1         | 0,254805802 | -0,464166005 |
| Znf148        | 0,254866586 | 0,956384023  |
| Timm50        | 0,254968989 | -0,371458054 |
| Golph3        | 0,255025765 | -0,35716629  |
| Ccar1         | 0,255074447 | -0,237294515 |
| A430005L14Rik | 0,255198713 | 0,3591067    |
| Engase        | 0,255747487 | -0,298196157 |
| Rab9a         | 0,256282845 | -0,377556483 |
| Kpna2         | 0,256336013 | -0,280919393 |
| Syvn1         | 0,256846586 | -0,602847417 |
| Ptpmt1        | 0,256976315 | -0,479946772 |
| Gatm          | 0,257301243 | 3,203164419  |
| Gm8730        | 0,257324238 | 2,291557312  |
| Rbm19         | 0,257417234 | -0,821661631 |
| Ppif          | 0,257465918 | -0,266994476 |

Table S2.

|                 |             |              |
|-----------------|-------------|--------------|
| Arfgap2         | 0,257515419 | 0,499027888  |
| Chmp1b1         | 0,25756891  | -0,31678772  |
| Canx            | 0,257801441 | -0,309857686 |
| Ociad1          | 0,257867947 | 0,495687485  |
| Rpa2            | 0,2583648   | -1,765103658 |
| Acaca           | 0,258597361 | -0,433076223 |
| Clasp1          | 0,258704428 | -0,593355815 |
| Ctdspl;Ctdsp1   | 0,258807662 | -1,156346003 |
| Chmp1b2         | 0,258814815 | 0,333651225  |
| Ano9            | 0,25882494  | -0,423683802 |
| Gripap1         | 0,258841226 | -0,402772903 |
| Bin2            | 0,258910978 | 0,482385635  |
| Rcor1           | 0,258917928 | -1,247550329 |
| Pcyt1a          | 0,258926635 | 0,419858297  |
| Gpr108          | 0,258931845 | -1,243149439 |
| Tmem97          | 0,258944268 | 1,681590398  |
| Dnajc7          | 0,258979233 | -0,419231415 |
| Ube2v2          | 0,259082701 | 0,752327601  |
| Ikbip           | 0,259397217 | 1,06250445   |
| Itln1           | 0,259455847 | 0,412216822  |
| Isg15           | 0,259699762 | -0,416086833 |
| Cyp4f16;Cyp4f37 | 0,259726659 | -0,588585536 |
| Rps11           | 0,259750397 | 0,826945623  |
| Nup54           | 0,26008092  | -0,230620702 |
| Usp39           | 0,260115919 | -0,439237595 |
| Drg2            | 0,260122125 | 0,337095261  |
| Acot13          | 0,260142857 | -0,537644068 |
| Itgax           | 0,260167854 | -0,354139964 |
| Rab3a           | 0,260258423 | 0,803398768  |
| Hcfc1           | 0,260270891 | 0,370080312  |
| Mfn2            | 0,26037401  | -0,455319087 |
|                 | 0,260759494 | -0,307503382 |
| Dhodh           | 0,260816779 | -0,564750671 |
| Cp              | 0,261153025 | -0,481919607 |
| Qrich1          | 0,26118419  | -0,36228625  |
| Narf            | 0,261209008 | -0,367355982 |
| Tiprl           | 0,261684959 | 0,417609533  |
| Fkbp11          | 0,261753555 | 2,482242584  |
| Cnpy3           | 0,262089976 | -0,392482758 |
| Strn4           | 0,262169625 | -0,860327403 |
| Cela2a          | 0,262334385 | 1,388931274  |
| Aldh1l1         | 0,262836879 | -0,347976049 |
| Hmg20b          | 0,262841151 | -1,484869639 |
| Fgb             | 0,262853543 | 1,679248174  |
| Dynlt3          | 0,262867271 | 0,386405945  |
| Rufy3           | 0,263307359 | -0,550806046 |
| Kpnb1           | 0,264511408 | -0,293173472 |
| Lamb1           | 0,264570979 | -0,289749146 |
| Pithd1          | 0,265646226 | -0,643576304 |
| Ush1c           | 0,266196386 | -0,316359202 |
| Ppp4c           | 0,266300982 | 0,492881775  |
| Ranbp3          | 0,266695447 | -0,410373052 |



Table S2.

|                                 |             |              |
|---------------------------------|-------------|--------------|
| Thyn1                           | 0,266800157 | 0,58378919   |
| Hdac1;Gm10093                   | 0,266846184 | 0,509739558  |
| Gnpda1                          | 0,266918623 | -0,518246969 |
| Mst1r                           | 0,266937304 | -0,821589788 |
| Arfgef1                         | 0,266939192 | -0,3723526   |
| Ighv8-12                        | 0,266950666 | -1,600753784 |
| Tox3;Tox;Tox4                   | 0,266993336 | -0,49444898  |
| Ahnak                           | 0,267025801 | -0,246955872 |
| Gm2a                            | 0,267044706 | -0,685009003 |
| Aldoc                           | 0,267055229 | 0,788885752  |
| Etfb                            | 0,267130231 | -0,375220617 |
| Fga                             | 0,267399766 | 1,372355779  |
| Pla2g1b                         | 0,267400234 | 1,238955816  |
| Clca3b                          | 0,267414102 | 0,921365738  |
| Myl1;Myl3                       | 0,267504688 | -0,612641017 |
| Capn2                           | 0,267518316 | 0,331996282  |
| Fbln2                           | 0,267535283 | 1,572825114  |
| Slc25a22                        | 0,267547229 | -0,3960584   |
| Tmed1                           | 0,267555382 | 1,936976115  |
| Plcg2                           | 0,267659774 | 0,189788183  |
| Hmox2                           | 0,26817134  | -0,279109955 |
| Ppih                            | 0,268501167 | -0,391227722 |
| Gclm                            | 0,268523161 | -0,297012329 |
| Lactb2                          | 0,268726566 | -0,334672928 |
| Kars                            | 0,269255054 | 0,358665466  |
| Nt5c3b                          | 0,269292929 | -0,347694397 |
| Nucb2                           | 0,269301205 | 0,782042821  |
| C3                              | 0,269373204 | 0,561363856  |
| Rpn1                            | 0,269635093 | 0,538733164  |
| Lsm3                            | 0,270716835 | -0,466960907 |
| Atxn2l                          | 0,270730307 | 0,309737523  |
| Itih1                           | 0,270892594 | -0,420260111 |
| Trnt1                           | 0,27091938  | -0,323090871 |
| Fam50a                          | 0,270933747 | 0,533082962  |
| Alg6                            | 0,27125639  | -0,908928553 |
| Max                             | 0,271413086 | -0,595080058 |
| Naa15                           | 0,271537152 | -0,168318431 |
| Ipo5                            | 0,271616248 | -0,328601201 |
| Bpnt1                           | 0,272802474 | -0,38007609  |
| Tnik                            | 0,272907966 | -0,662094752 |
| Sfrp1                           | 0,272978362 | -1,457009633 |
| Dcun1d1                         | 0,273511008 | -0,339300791 |
| Gbas                            | 0,273601544 | 0,441841125  |
| Numb                            | 0,273627171 | -0,330132167 |
| Cyp2c68;Cyp2c69;Cyp2c40;Cyp2c67 | 0,273990741 | -0,818296432 |
| Leo1                            | 0,274412649 | -0,506425858 |
| Pitpnb                          | 0,2748151   | 0,569503784  |
| Rps6                            | 0,274921002 | 0,395119985  |
| Abcd3                           | 0,274960339 | -0,358078003 |
| Asna1                           | 0,274982267 | -0,383661906 |
|                                 | 0,276170901 | 1,185554504  |
| Syf2                            | 0,276523278 | -0,634044011 |

Table S2.

|                 |             |              |
|-----------------|-------------|--------------|
| Napa            | 0,276614912 | -0,377967834 |
| Lsp1            | 0,276619048 | 2,025042852  |
| Grn             | 0,276673587 | 0,819091797  |
| Chp1            | 0,276725317 | -0,338118871 |
| Slc11a2         | 0,276727692 | -1,456335068 |
| Clptm1l         | 0,276870633 | 0,63180542   |
| Dcaf7           | 0,277001918 | 0,802946726  |
| Naprt           | 0,277065234 | -0,361475627 |
| Rhog            | 0,277651207 | 0,483748754  |
| Smim24          | 0,277661043 | 1,062201182  |
| Strn3           | 0,277947893 | -0,253080368 |
| Eci1            | 0,278016086 | -0,33382225  |
| Naaladl1        | 0,278284621 | -2,507792155 |
| Psap            | 0,278305396 | -0,332473755 |
| Pabpc4;Gm10110  | 0,278321593 | 0,801326752  |
| Hnf4g           | 0,278366068 | -0,97327741  |
| Zc3hav1         | 0,278472477 | 0,585865657  |
| Mdh1            | 0,278531549 | -0,454341888 |
| Alb             | 0,279148741 | -0,584148407 |
| Khdrbs1         | 0,279161832 | -0,283798218 |
| Agl             | 0,279233295 | 0,482273102  |
| Tmem65          | 0,279255246 | -0,704446157 |
| Sparc           | 0,279300229 | 0,676314036  |
| Erlec1          | 0,27947236  | 1,350589116  |
| Atp5l           | 0,279698171 | -0,252339045 |
| Smad1           | 0,28048992  | -0,457438151 |
| Yif1a           | 0,28053445  | -0,971385956 |
| Ndufb8          | 0,280549467 | 0,435756048  |
| Tbcb            | 0,28064128  | 0,789419174  |
| Ccdc132         | 0,280705524 | -0,784627914 |
| Mrps24          | 0,281654753 | 0,719601313  |
| Slc38a10        | 0,282221209 | -0,755187988 |
| Cisd2           | 0,282582067 | 0,350854238  |
| Mrpl33          | 0,283287505 | 0,928563436  |
| Lxn             | 0,283442673 | -0,578341166 |
| Tomm5           | 0,283760243 | -0,522392909 |
| Tbc1d9b         | 0,28376926  | -0,345989863 |
| Nasp            | 0,283769435 | -0,396942774 |
| Arpc5           | 0,283827142 | -0,415801366 |
| Ythdf3          | 0,283847028 | 1,491873423  |
| Abat            | 0,283954545 | -0,585447947 |
| Znf207;Zfp207   | 0,284062145 | 1,991687775  |
| Snap23          | 0,284470499 | 0,434604645  |
| Sp1;Sp4;Sp9;Sp8 | 0,284484298 | 1,010712306  |
| Nrd1            | 0,284498107 | -0,27879715  |
| Pofut2          | 0,285019282 | -0,605585098 |
| Ube2h           | 0,285909297 | -0,451307933 |
| Apoo            | 0,286707971 | 0,602884293  |
| Stx7            | 0,286813137 | 0,501628876  |
| Snx3            | 0,28692145  | -0,31696256  |
| Tcea1           | 0,287673962 | -0,36205101  |
| Psmb1           | 0,287966805 | 0,286762873  |

Table S2.

|              |             |              |
|--------------|-------------|--------------|
| Arpc1b       | 0,288553336 | 0,52275149   |
| Tpmt         | 0,288571644 | -0,500610987 |
| Uchl1        | 0,288610399 | 0,179868062  |
| Rab8a        | 0,288741243 | -0,484446208 |
| Apaf1        | 0,289159639 | -0,843987783 |
| Tf           | 0,289174878 | -0,327380498 |
| Emc3         | 0,289193378 | 0,583740234  |
| Cox5a        | 0,289196543 | -0,363435109 |
| Smcp2        | 0,289258647 | 1,02355957   |
| Exosc4       | 0,289302221 | 1,48021698   |
| Ap1m2        | 0,28965077  | 0,280255636  |
| Nudcd2       | 0,289756757 | -0,295577367 |
| Yes1         | 0,289759579 | -2,009953181 |
| Immt         | 0,289924203 | 0,669065475  |
| Yars2        | 0,290412603 | -0,179559708 |
| Ap2m1        | 0,290627672 | 0,42224884   |
| Naca         | 0,29066317  | 0,788208644  |
| Eef1b;Eef1b2 | 0,290686657 | 0,479703267  |
| Rps21        | 0,291328839 | 0,718627294  |
| Cdc5l        | 0,291471359 | -0,222463608 |
| Rpl17        | 0,291621257 | 0,36403211   |
| Ncoa5        | 0,291655817 | -0,413005829 |
| Tuft1        | 0,291902767 | -1,642778397 |
| Ppp1r10      | 0,293127477 | -0,49270312  |
| Cdc37        | 0,293550075 | -0,28687795  |
| Eif2d        | 0,293924542 | -1,083390554 |
| Tmpo         | 0,294455564 | 0,522078196  |
| Aldh1l2      | 0,295533532 | 2,983573914  |
| Guk1         | 0,295534676 | -0,396268209 |
| Cirh1a       | 0,295549085 | 0,805018743  |
| Nup160       | 0,295562687 | 1,182918549  |
| Ighv3-6      | 0,295563501 | -1,115117391 |
| Stk39        | 0,295571802 | -0,417220434 |
| Adpgk        | 0,295597466 | 0,695877075  |
| Ap1g1        | 0,295748325 | -0,376640956 |
| Fkbp3        | 0,295803498 | -0,385803858 |
| Ythdf2       | 0,29589736  | 1,773391088  |
| Lima1        | 0,29600744  | 0,417821884  |
| Ighv3-5      | 0,296178439 | -1,084306717 |
| Vps28        | 0,296249721 | -0,412665049 |
| Keap1        | 0,296414254 | -1,927993139 |
| H2-Eb1       | 0,296524322 | -1,167392095 |
| Sf3b5        | 0,296601783 | -0,413005829 |
| Exoc3        | 0,296922849 | -1,637152354 |
| Osbpl10      | 0,297033024 | 1,603359858  |
| Smpd3        | 0,297505376 | -0,331886927 |
| Ubqln4       | 0,29767235  | -0,256676992 |
| Qsox1        | 0,297676176 | -0,299157461 |
| Fuk          | 0,29901037  | -0,340429942 |
| Susd2        | 0,299240281 | -0,283714294 |
| Glg1         | 0,299289415 | -0,256786982 |
| Itpa         | 0,299464497 | -0,290776571 |

Table S2.

|                |             |              |
|----------------|-------------|--------------|
| Ppp1cc         | 0,299486496 | 0,477790197  |
| Parp10         | 0,299902403 | 1,149490992  |
| Nova2          | 0,300805617 | 1,16027832   |
| Syap1          | 0,301271787 | -0,289014816 |
| Cel            | 0,301341707 | 1,68547821   |
| Gucy1b3        | 0,30151052  | 0,715356191  |
| Srpr           | 0,301791882 | 0,72572581   |
| Ero1lb         | 0,30249502  | 1,166233063  |
| Aldoa;Aldoart1 | 0,302586067 | 0,314959208  |
| Cpne1          | 0,302663717 | -0,303303401 |
| Scg2           | 0,302751658 | -0,367480596 |
| Plscr3         | 0,303029098 | -0,609518051 |
| Ppp3ca         | 0,303125184 | 0,28631719   |
| Tcof1          | 0,303446855 | 1,043345769  |
| Hspe1          | 0,303459897 | 0,30839475   |
| Mtnd4          | 0,303480309 | 0,788731893  |
| Fam162a        | 0,304185226 | 0,215527852  |
| Cpsf1          | 0,304195445 | -0,269384384 |
| Usp47          | 0,304264706 | -0,243684769 |
| Col6a5         | 0,305100917 | 0,409288406  |
| Psm2           | 0,305174743 | -0,229434331 |
| Ctsl           | 0,305236871 | -0,335574468 |
| Lta4h          | 0,305540719 | -0,255536397 |
| Polr2e         | 0,305786891 | -0,695237478 |
| Golgb1         | 0,30586432  | -0,291280746 |
| Nptn           | 0,305898901 | -0,24762853  |
| Rer1           | 0,305961158 | -0,390054067 |
| Dctpp1         | 0,306032258 | -0,449090322 |
| Epdr1          | 0,306150805 | -0,707279205 |
| Rrp9           | 0,306269203 | 0,766081492  |
| BC017643       | 0,306302232 | -2,417022069 |
| Wibg           | 0,306331261 | 0,221365611  |
| Ppp3r1         | 0,306657895 | -0,396225611 |
| Hpx            | 0,307009134 | 0,421285629  |
| Ptma           | 0,307103322 | -0,242459615 |
| Snx9           | 0,307140979 | -0,28831927  |
| Snrpd1         | 0,307494353 | -0,839407603 |
| Impa2          | 0,307498177 | 1,01413854   |
| Txlna          | 0,307508567 | -0,221984227 |
| Abi1           | 0,307524781 | 0,469685872  |
| Psmb9          | 0,307546151 | -0,557326635 |
| Plekha6        | 0,307560408 | 0,976093292  |
| Hnrnpul2       | 0,307613139 | 0,222141266  |
| Nat6           | 0,307624181 | 0,936701457  |
| Yipf3          | 0,30767237  | -1,569558462 |
| Slc5a1         | 0,30829247  | -0,50739034  |
| Rps20          | 0,308410033 | 0,435849508  |
| Fam49b         | 0,308522182 | -0,23106575  |
| Hsd12          | 0,308549219 | 1,187014898  |
| Fam213a        | 0,30856686  | -0,824742635 |
| Cmpk2          | 0,309129993 | -0,426897049 |
|                | 0,309474601 | 0,529027939  |

Table S2.

|                                       |             |              |
|---------------------------------------|-------------|--------------|
| Bckdha                                | 0,309488575 | 1,199047724  |
| Impad1                                | 0,309547498 | 0,566390991  |
| Mon2                                  | 0,309586933 | -0,322664897 |
| Fut8                                  | 0,309632476 | -0,303447723 |
| Apbb1ip                               | 0,309736232 | 0,911190669  |
| Psemb10                               | 0,310881565 | 0,846041997  |
| Lap3                                  | 0,310893956 | -0,293730418 |
| Paip1                                 | 0,310916727 | -0,518056234 |
| Asl                                   | 0,310920405 | -0,348884583 |
|                                       | 0,311084268 | 0,653812408  |
| Cgn                                   | 0,311135526 | -0,182191849 |
| Sh3glb2                               | 0,311172813 | -0,547039668 |
| Prps1l3;Prps1                         | 0,311257225 | -0,316682816 |
| Fibp                                  | 0,311891658 | -0,53768158  |
| Abhd12                                | 0,312046176 | 0,39099884   |
| Ceacam18                              | 0,312064958 | -1,363665899 |
| Hspa9                                 | 0,312098195 | -0,27200826  |
| Cdk9                                  | 0,312911648 | 1,036800385  |
| Rbm15                                 | 0,313084355 | -0,421307882 |
| Nsfl1c                                | 0,313183423 | 0,515548706  |
| Slc25a4                               | 0,313196975 | 0,339302063  |
| Aars                                  | 0,313309798 | -0,183861415 |
| Top2a                                 | 0,313540677 | -0,248812358 |
| Glo1                                  | 0,313989205 | -0,367399216 |
| Naip1                                 | 0,314202878 | -1,630325953 |
| Ppig                                  | 0,314353448 | 0,646231969  |
|                                       | 0,314356912 | 1,480305354  |
| Ubp2                                  | 0,314429033 | 1,124223073  |
| Stam2                                 | 0,314501797 | -0,304053624 |
| Uaca                                  | 0,314614887 | -2,202730815 |
| Srek1                                 | 0,31467911  | -0,674242655 |
| Pxn                                   | 0,31581916  | 0,253899256  |
| Cbl                                   | 0,316747489 | -0,934856415 |
| Ddx3y                                 | 0,316803155 | -0,496042252 |
| Rrm1                                  | 0,317035125 | -0,333641052 |
| Hsd17b12                              | 0,317798638 | -0,377598445 |
| Akap8l                                | 0,318768349 | 0,41316096   |
| Znf22                                 | 0,318816619 | 0,667070389  |
| Reg1                                  | 0,319166786 | 1,178120931  |
| Supt5h                                | 0,319544902 | 0,483459473  |
| Mettl7a1;Methig1;UbiE2;Mettl7a2;Mettl | 0,320054363 | 0,492643992  |
| Pcsk1n                                | 0,320205861 | -0,383391698 |
| Atl2                                  | 0,320238827 | -0,294687271 |
| Ighg1                                 | 0,320380136 | -0,745033264 |
| Ethe1                                 | 0,320516589 | 0,298353831  |
| Tbc1d17                               | 0,32059     | 1,219917933  |
| Lrrc47                                | 0,320630978 | 0,181793213  |
| Commd3                                | 0,320641026 | -0,56466039  |
| Epb41l2                               | 0,320672844 | -0,258467356 |
| Dap                                   | 0,320705882 | 1,191827774  |
| Ddx41                                 | 0,320713267 | -0,53174909  |
| Capzb                                 | 0,320745448 | 0,299341202  |

Table S2.

|                       |             |              |
|-----------------------|-------------|--------------|
| Hist1h4a              | 0,320755255 | 0,4116834    |
| Spg20                 | 0,320760413 | -0,361719131 |
| Ctsd                  | 0,32077153  | 0,715766907  |
| Usp24                 | 0,321548845 | -0,53907903  |
| Itih3                 | 0,321577525 | -0,293327332 |
| Uqcrb                 | 0,321599431 | -0,216206233 |
| Mvk                   | 0,321619623 | -0,422166189 |
| Sqrdl                 | 0,321663113 | 0,221403758  |
| Ech1                  | 0,322160511 | -0,204295476 |
| Ahsa1                 | 0,322708304 | 0,469774882  |
| Nup205                | 0,32272437  | -0,220097224 |
| Sort1                 | 0,322778843 | -0,59835434  |
| Uba5                  | 0,322957816 | 0,536654154  |
| RBM8;Rbm8a            | 0,32298406  | 0,30119578   |
| Slc4a4                | 0,323041135 | -0,544041316 |
| Clasp2                | 0,323098512 | 1,10244751   |
| Ppp1r9b               | 0,323137394 | -1,796445847 |
| Prmt5                 | 0,32340531  | -0,345546722 |
| Cnp                   | 0,324287332 | -0,466334025 |
| Thns12                | 0,324646393 | -0,416706085 |
| Hbb-b2                | 0,324713123 | 2,118039449  |
| Pdia5                 | 0,324869565 | -0,384618123 |
| Pi4ka                 | 0,32490318  | 0,587317149  |
| Rab14                 | 0,324928294 | 0,19776535   |
| Rraga;Rragb           | 0,325597458 | -0,31638972  |
| F12                   | 0,325610152 | -0,756912231 |
| Gabarap               | 0,325722751 | 1,093927383  |
| Rnmt                  | 0,325724965 | 2,045512517  |
| Acp6                  | 0,325748765 | -0,413362503 |
| Rps14                 | 0,325819979 | 0,436418533  |
| Sh3gl1                | 0,325918252 | -0,275093079 |
| Mrps34                | 0,326015482 | -0,371725718 |
| Sec22b                | 0,326130236 | 0,302820841  |
| Sult1d1               | 0,32614019  | -0,413615545 |
| Ighv1-42;Ighv1-43     | 0,326169014 | -0,664193471 |
| Krt15                 | 0,327175272 | -1,486846288 |
| Vipas39               | 0,327195782 | 0,508916855  |
| Aco1                  | 0,327242446 | -0,184408188 |
| Ddx46                 | 0,327254309 | -0,234692256 |
| Cdc42bpb              | 0,32731083  | -0,223541896 |
| Hook2                 | 0,327373815 | -1,782554626 |
| Mlf2                  | 0,327374035 | 1,151613235  |
| Banf1                 | 0,327397472 | -0,452925364 |
| Hdhd2;Ier3ip1;Gm10784 | 0,327593125 | 0,499809901  |
| Smad2                 | 0,327795231 | 0,405971527  |
| Lrrfip1               | 0,327816334 | 0,24559021   |
| Cd74                  | 0,327831815 | -0,688552856 |
| Naga                  | 0,327956567 | -0,265357971 |
| Eif3l                 | 0,328088235 | -0,283512751 |
| Plaa                  | 0,328533427 | -0,293345769 |
| Cnn2                  | 0,328707198 | 0,338488897  |
| Arhgap1               | 0,328736179 | 0,281163534  |

Table S2.

|        |             |              |
|--------|-------------|--------------|
| Eif4g3 | 0,328782943 | -0,581509272 |
| Fgg    | 0,32889262  | 1,297663371  |
| Nploc4 | 0,328897902 | 0,168949763  |
| Hnrnp3 | 0,32950751  | -0,490820567 |
| Pdia6  | 0,330147295 | 0,53284963   |
| Necap1 | 0,330148045 | -0,426919937 |
| Exoc7  | 0,330343336 | -0,389180501 |
| Fis1   | 0,330369027 | -0,266992569 |
| Mink1  | 0,33066016  | -0,702565511 |
| Hic2   | 0,330671777 | -0,859745661 |
| Cox6c  | 0,330736402 | 0,441244125  |
| Kif5b  | 0,330760348 | -0,176995595 |
| Tmtc3  | 0,330837274 | -0,381771088 |
| Atpaf1 | 0,330875435 | -0,376516978 |
| Ivd    | 0,330942897 | 0,525047302  |
| Chmp2b | 0,330947442 | -0,236586253 |
| Pelo   | 0,331021944 | -0,380422592 |
| Ube2g2 | 0,332230796 | -0,321365992 |
| Nat8   | 0,332436414 | -0,837607702 |
| Arrb1  | 0,332677778 | -0,32637914  |
| Gcat   | 0,332750261 | 1,281730016  |
| Gcnt3  | 0,33403331  | 1,073919296  |
| Gsk3b  | 0,334106213 | 0,398402532  |
| Usp4   | 0,335235784 | 0,212681452  |
| Ubxn1  | 0,335281304 | 0,288040161  |
| Cpsf7  | 0,335338648 | -0,638808568 |
| Cox16  | 0,335891892 | -0,713384628 |
| Gnl1   | 0,335936266 | -0,629791896 |
| Prpf4  | 0,336969529 | 0,305185954  |
| Fech   | 0,337049498 | -0,313757579 |
| Crip1  | 0,337088897 | -0,375634511 |
| Psmb2  | 0,337175087 | -0,293076833 |
| Nup35  | 0,337608575 | 1,12313652   |
| S100a4 | 0,337698309 | 0,865736643  |
| Ano6   | 0,337729692 | -0,633367538 |
| Zc3h18 | 0,337758454 | 0,62061882   |
| Mat2a  | 0,337771942 | 0,285974503  |
| Cant1  | 0,337814917 | -0,175880432 |
| Pik3r4 | 0,337884629 | -0,627391179 |
| Tdp1   | 0,338784828 | -1,176250458 |
| Der11  | 0,33890169  | -0,478621165 |
| Khsrp  | 0,339215713 | 0,295401891  |
| Dtna   | 0,33925732  | 0,725336711  |
| Pard3  | 0,339268847 | 1,008457184  |
| Gosr2  | 0,339273228 | 0,412055333  |
| Ddx21  | 0,339292011 | 0,333914439  |
| Rtkn   | 0,339332644 | 0,986589432  |
| Pdcd11 | 0,339749656 | -0,714349111 |
| Stk10  | 0,339866529 | -0,488924662 |
| Dhrs1  | 0,339944998 | 0,493041356  |
| Eif4e2 | 0,340200687 | -0,50341479  |
| Armc1  | 0,340685675 | 1,199197133  |

Table S2.

|                         |             |              |
|-------------------------|-------------|--------------|
| Irf2bp2                 | 0,341248626 | 1,400110245  |
| Pde2a                   | 0,341288019 | 0,772384008  |
| Glb1                    | 0,341562114 | -0,35879008  |
| Asah1                   | 0,342379417 | -0,327582041 |
| Samd9l                  | 0,343256516 | -0,32691129  |
| Ciao1                   | 0,344281111 | 1,508708954  |
| Selt                    | 0,34507745  | -0,330043793 |
| Msh6                    | 0,346258904 | -0,489038467 |
| Ubr4                    | 0,346377527 | -0,281475703 |
| Mark2                   | 0,346444368 | -0,264403661 |
| Rpl7a                   | 0,347249829 | 0,400155385  |
| Rhob                    | 0,347325351 | -0,723642985 |
| Pgm1                    | 0,347398291 | -0,275773366 |
| Aspn                    | 0,347436389 | 0,44165357   |
| Umps                    | 0,347506662 | -0,350248973 |
| Hspa14                  | 0,347583049 | 0,666067759  |
| Mdh2                    | 0,347673497 | -0,34319814  |
| Hgh1                    | 0,347759645 | 0,46333758   |
| Sema4b                  | 0,348095563 | -0,326589584 |
| Galnt2                  | 0,348279768 | 0,464876811  |
| Diap1;Diaph1            | 0,348313779 | -0,225839615 |
| Bcar3                   | 0,348826458 | -0,493701299 |
| Misp                    | 0,349828221 | 0,669055303  |
| Tmed7                   | 0,350202385 | 0,341798147  |
| Rnf20                   | 0,350237057 | -0,287133535 |
| Chmp1a                  | 0,351305886 | 0,573764801  |
| Gabarapl2               | 0,351425459 | 0,274150213  |
| Ero1l                   | 0,351442969 | 0,338762919  |
| Psmc2                   | 0,352053043 | 0,342882156  |
| Chmp5                   | 0,352142857 | -0,217667262 |
| Igfbp1                  | 0,352216179 | -0,193604787 |
| Dbi                     | 0,352881494 | -0,297515869 |
| Dpp9                    | 0,352888587 | 0,253355662  |
| Denr                    | 0,352926945 | 0,459692001  |
| Acot2                   | 0,352978622 | 0,734607061  |
| Ube2n                   | 0,353098439 | -0,182099024 |
| Lipa                    | 0,353290366 | -0,529339472 |
| Sfxn3                   | 0,353489318 | 0,209300995  |
| Tcf7l2;Lef1;Tcf7l1;Tcf7 | 0,353906441 | -0,376581828 |
| Cfdp1                   | 0,354133965 | 0,918317795  |
| Dync1i2                 | 0,354253807 | 0,22856458   |
| Ppme1                   | 0,354309726 | -0,415525436 |
| Ints4                   | 0,354373731 | -0,482411702 |
| Cog2                    | 0,354493735 | -0,305154165 |
| Ccnt1                   | 0,354536585 | 0,595647812  |
| B3gnt3                  | 0,354550372 | -0,497450511 |
| Pycrl                   | 0,35462834  | -0,262789408 |
| Fam129b                 | 0,355390541 | -0,301006317 |
| Nap1l4                  | 0,355510645 | -0,134990692 |
| Prdx1                   | 0,355775751 | -0,312328339 |
| Slc25a5                 | 0,35584605  | 0,172063192  |
| Nme2                    | 0,356255147 | -0,562093099 |



Table S2.

|                                 |             |              |
|---------------------------------|-------------|--------------|
| Lama4                           | 0,356777328 | -0,239490509 |
| Dnajc5                          | 0,356816189 | -0,405925751 |
| Mtmt3;Mtmt4                     | 0,357000674 | -1,369274775 |
| Dlat                            | 0,357237197 | 0,202875773  |
| Plbd1                           | 0,357322548 | -0,308308919 |
| Tom1                            | 0,357574941 | -0,595753352 |
| Fam213b                         | 0,357615876 | -0,446239471 |
| Numa1                           | 0,357702357 | 1,07065773   |
| Acbd5                           | 0,357736205 | -0,507455826 |
| Cdk11b                          | 0,357777179 | -0,476401011 |
| Psip1                           | 0,358713277 | 0,250061035  |
| Rbbp4                           | 0,358769334 | -0,25763003  |
| Cops5                           | 0,358869624 | 0,238369624  |
| Picalm                          | 0,358977837 | -0,262790044 |
| Crat                            | 0,359093656 | -0,41327858  |
| Gtf2b                           | 0,359098421 | 1,565951665  |
| Pklr                            | 0,36186443  | -0,368621826 |
| Ago1                            | 0,362140221 | 0,540686925  |
| Clybl                           | 0,362190476 | 0,19300588   |
| Tagln                           | 0,362724774 | 0,26757431   |
| Timm10                          | 0,36330429  | -0,268639247 |
| Fer                             | 0,36360201  | -0,529671987 |
| Smpd2                           | 0,363819156 | -0,364510854 |
| Sccpdh                          | 0,364127175 | 0,400772095  |
| Cmc1                            | 0,364249079 | -0,22931544  |
| Oxa1l                           | 0,36491268  | -0,367736816 |
| Mut                             | 0,365071572 | 0,391930262  |
| Vcl                             | 0,365088599 | -0,175735474 |
| Pcmt1                           | 0,365275401 | 0,267011642  |
| Hdac2                           | 0,365673674 | 0,699151993  |
| Chac2                           | 0,365748831 | -0,974245707 |
| Camk2d                          | 0,365773623 | 0,238091787  |
| Rap2a                           | 0,365795728 | -0,414045334 |
| Nolc1                           | 0,365871032 | -0,512706121 |
| Igkv8-27                        | 0,365886591 | -1,19417127  |
| Trabd                           | 0,366212738 | 0,514070511  |
| Otub1                           | 0,366514324 | -0,185440063 |
| Twf1                            | 0,366537821 | -0,254677455 |
| Ncl                             | 0,366588    | 0,372006734  |
| Coq3                            | 0,366909091 | -0,283185959 |
| Lamtor3                         | 0,367079893 | 0,622386297  |
| Ap1s1;Ap1s2                     | 0,367137438 | -0,449383418 |
| Xpo4                            | 0,3679002   | 0,432944616  |
| Dnajc2                          | 0,368441636 | -0,253612518 |
| Eefsec                          | 0,368702757 | -0,290967941 |
| Mup4;Mup9;Mup8;Mup6;Mup14;Mup15 | 0,368772606 | 1,324664434  |
| Fubp1                           | 0,368790698 | 0,2243735    |
| Fbxo25                          | 0,368882685 | -1,007635752 |
| Gmpr2                           | 0,369104914 | 0,83672905   |
| Gpd1l                           | 0,369407162 | -0,369373322 |
| Pcmt1                           | 0,369473614 | -0,413317998 |
| Fam160a2                        | 0,369529685 | -0,635626475 |

Table S2.

|                |             |              |
|----------------|-------------|--------------|
| Anp32e         | 0,369617784 | -0,328261058 |
| Cdc42bpg       | 0,370096122 | 1,367126465  |
| Idi1           | 0,370648559 | 0,289259593  |
| Wbp2           | 0,370771372 | 1,616439184  |
| Mccc2          | 0,371146543 | 0,512749354  |
| Brd1           | 0,371269358 | 0,489277522  |
| Wdr61          | 0,371351208 | -0,532034556 |
| Sec61g         | 0,371437086 | 0,840976715  |
| Hadha          | 0,371791005 | 0,268951416  |
| Gbf1           | 0,372058182 | -0,309552511 |
| Ctrb1          | 0,373748843 | 0,880123138  |
| Tpd52l2        | 0,374002639 | -0,267451604 |
| Eif2s1         | 0,374023778 | -0,263577143 |
| Ubl5;Gm16381   | 0,374031054 | -0,262357712 |
| Strap          | 0,374126031 | -0,254676819 |
| Ehhadh         | 0,374213579 | -0,333179474 |
| Chmp4c         | 0,374215182 | 0,958128611  |
| Arhgef5        | 0,374226477 | -0,465906779 |
| Polr2h         | 0,374282702 | 0,384046555  |
| Prkag2         | 0,374296076 | 1,673087438  |
| Apeh           | 0,374387352 | -0,433192571 |
| Adgre5;Cd97    | 0,374422127 | 0,378006617  |
| Slc12a9        | 0,374707895 | -0,768496831 |
| Tmem59         | 0,37473511  | 0,244839986  |
| Naa50          | 0,37485846  | 1,039704641  |
| Mrps17         | 0,374888524 | 1,079573949  |
| Ube2r2         | 0,376410256 | 0,812366486  |
| Itih2          | 0,376701708 | -0,418729146 |
| Eif2a          | 0,376716398 | 0,337862015  |
| Rap1b          | 0,376885386 | 0,298439026  |
| Srsf6          | 0,377709783 | 0,441480637  |
| Hnrnpu;Gm28062 | 0,377715223 | 0,334457397  |
| Fbn1           | 0,377780112 | 0,429913839  |
| Fam114a1       | 0,377814365 | -0,412163417 |
| Psm3           | 0,378171803 | 0,237341563  |
| Erp29          | 0,378203868 | -0,261604309 |
| Mif            | 0,378471513 | 0,267341614  |
| Ywhaz          | 0,378570118 | 0,217903137  |
| Calr           | 0,37859548  | -0,228983561 |
| Nfkb1          | 0,380133508 | -0,274807612 |
| Ripk1          | 0,380144026 | -1,081195196 |
| Ebna1bp2       | 0,380520772 | -0,338019053 |
| Ndufa5         | 0,380886275 | -0,44713974  |
| Leng9          | 0,381010788 | -0,594784419 |
| Ccdc186        | 0,381054284 | -0,442747752 |
| Chchd3         | 0,382827834 | 0,440781275  |
| Msn            | 0,382856956 | 0,241279602  |
| Hbb-b1         | 0,383132986 | 2,462658564  |
| Fermt3         | 0,383188254 | 0,269402822  |
| Igf2bp2        | 0,383215405 | -0,28524971  |
| St3gal6        | 0,383242009 | 0,532205582  |
| Ssr3           | 0,383257907 | 0,569192251  |

Table S2.

|          |             |              |
|----------|-------------|--------------|
| Apmap    | 0,383302644 | 0,264422099  |
| Zw10     | 0,383734115 | -0,471863429 |
| Sel1l    | 0,384085993 | 0,38163503   |
| Vps36    | 0,384178444 | -0,327886581 |
| Dhx29    | 0,384576635 | -0,40331459  |
| Bccip    | 0,384627604 | -0,933945974 |
| Cbr4     | 0,384720416 | 0,226851781  |
| Chp2     | 0,38476878  | -0,309270859 |
| Lamb2    | 0,384783344 | 0,335309982  |
| Strn     | 0,387002925 | 0,575938543  |
| Csnk1a1  | 0,387454722 | -0,283638636 |
| Myh14    | 0,38751039  | -0,253348033 |
| Mtch2    | 0,387624431 | -0,20132192  |
| Fahd1    | 0,387636246 | -0,3606294   |
| Diablo   | 0,387875406 | -0,207667669 |
| Supv3l1  | 0,38841518  | -0,402452469 |
| Dgkq     | 0,388486066 | 1,030059179  |
| Rabggta  | 0,388567909 | -0,319056829 |
| Copa     | 0,388575875 | -0,209097544 |
| Coq5     | 0,388921283 | 0,432832082  |
| Csnk2a1  | 0,389050518 | -0,294895808 |
| Bag2     | 0,389319521 | 0,811527888  |
| Mrpl46   | 0,389524426 | 0,415799459  |
| Aim1l    | 0,389650485 | -0,477830887 |
| Mcm4     | 0,389856404 | -0,280857722 |
| Lsm12    | 0,390738203 | -0,413250605 |
| Smpdl3a  | 0,390864533 | -0,514420827 |
| Pnlip    | 0,390966074 | 1,190531413  |
| Adtrp    | 0,39103876  | -0,75590833  |
| Traf6    | 0,391467872 | 0,472357432  |
| Gstt3    | 0,391916075 | 0,398196538  |
| Tmpo     | 0,392486452 | 0,448322296  |
|          | 0,392494034 | -0,428430557 |
| Ebp      | 0,392613101 | -0,295941671 |
| Rabl6    | 0,392994197 | 0,388177872  |
| Fam114a2 | 0,39303126  | -0,297118505 |
| Serbp1   | 0,393090206 | 0,289243062  |
| Ptpn12   | 0,393433816 | 0,473763784  |
| Cenpv    | 0,394591567 | 0,427474976  |
| Got1     | 0,394625885 | 0,299238841  |
| Aldh16a1 | 0,395075933 | -0,270433426 |
| Rfx1     | 0,395297523 | -0,874802907 |
| Stoml2   | 0,395872669 | 0,395925522  |
| Reg2     | 0,396041144 | 1,22150294   |
| Cstb     | 0,396546272 | -0,316118876 |
| Cds2     | 0,396986829 | -0,271389008 |
| Jph2     | 0,39735517  | 1,523787816  |
| Eif3b    | 0,397420225 | -0,228421529 |
| Calu     | 0,398716715 | -0,24323527  |
| Sdhc     | 0,398801027 | 0,55534935   |
| Lgals9   | 0,398927518 | 0,262397766  |
| Wdr82    | 0,399076627 | -0,249689102 |

Table S2.

|           |        |             |              |
|-----------|--------|-------------|--------------|
| Psat1     |        | 0,399753433 | 1,630343755  |
| Sumo2     |        | 0,399791826 | 0,301939011  |
| Igkv2-137 |        | 0,399841534 | -0,761645635 |
| Mpi       |        | 0,399845515 | -0,3164711   |
| Fundc2    |        | 0,399850336 | -0,37018458  |
| Dnph1     |        | 0,399893896 | -0,437385559 |
| Actb      |        | 0,399897534 | 1,768511454  |
| Eif5a     |        | 0,39990016  | 0,541852951  |
| Vps18     |        | 0,399908134 | 1,110141754  |
| Dpep1     |        | 0,399934741 | -0,467614492 |
| Pacs1     |        | 0,399946188 | 0,473606745  |
| Vps25     |        | 0,39994757  | 0,314305623  |
| Ndufb2    |        | 0,399956605 | 1,90845108   |
| Mrpl19    |        | 0,399959027 | 0,502545675  |
| Tpm4      |        | 0,399962832 | 0,396362305  |
| Aldh1a3   |        | 0,400011538 | -0,17033577  |
|           | Sep-11 | 0,400450255 | -0,202879588 |
| Actr3     |        | 0,400896815 | 0,203229268  |
| Ei24      |        | 0,400991399 | 0,48211352   |
| Exosc6    |        | 0,40104176  | 0,467375437  |
| Sec24a    |        | 0,401119184 | 0,224902471  |
| Mgat2     |        | 0,401155952 | -0,332556407 |
| Golga1    |        | 0,40124419  | -0,496798197 |
| Pctp      |        | 0,401643016 | -0,260865529 |
| Mgat1     |        | 0,402386523 | 0,432587306  |
| Cox20     |        | 0,402412214 | 0,390349706  |
| Ccs       |        | 0,402514467 | -0,304697037 |
| Nmt1      |        | 0,402547188 | -0,338038762 |
| Myd88     |        | 0,402578145 | -0,267873764 |
| Wapal     |        | 0,402607812 | -0,394616445 |
| Oat       |        | 0,403112381 | -0,455459595 |
| Shc1      |        | 0,403365482 | 0,293433507  |
| Wipi1     |        | 0,403413892 | 0,760875702  |
| Bola1     |        | 0,403450333 | -0,807128906 |
| Mtm1      |        | 0,403929002 | 0,55238533   |
| Tspan15   |        | 0,403953075 | -0,640207291 |
| Sf3b6     |        | 0,404814697 | -0,22238795  |
| P4hb      |        | 0,404877493 | -0,398755391 |
| Rbm27     |        | 0,404937302 | 0,406195958  |
| Med24     |        | 0,404942966 | -1,143290838 |
| Cox7a2l   |        | 0,407774684 | 0,676464717  |
| Mvd       |        | 0,407965834 | 0,342189789  |
| Ecsit     |        | 0,408239089 | -0,308579127 |
| Kdm2a     |        | 0,408543616 | -0,397692998 |
| Mpv17     |        | 0,408672779 | 0,790664673  |
| Top2b     |        | 0,409070458 | -0,149657567 |
| Copb2     |        | 0,40947395  | -0,212364833 |
|           | Sep-01 | 0,409567909 | -0,866599401 |
| Gstm2     |        | 0,410082071 | -0,645172755 |
| Serpina1e |        | 0,410119281 | 0,861785253  |
| Fam98a    |        | 0,410276341 | 0,251272837  |
| Plekha7   |        | 0,410960302 | 0,901589076  |

Table S2.

|                     |             |              |
|---------------------|-------------|--------------|
| Pqlc3               | 0,41108982  | 0,650632858  |
| Cd81                | 0,411180328 | -0,346413294 |
| Gmppa               | 0,411251971 | -0,296571096 |
| Ppp1r12a            | 0,411449449 | 0,319089254  |
| Hsp90ab1            | 0,411830028 | -0,91775322  |
| Actr10              | 0,411926952 | 0,313398361  |
| Ndufa7              | 0,412173585 | -0,375228882 |
| Rcn1                | 0,412229003 | -0,417771657 |
| Lnpep               | 0,41226281  | -0,200721741 |
| Tpp2                | 0,412276904 | -0,212591171 |
| Trmt2a              | 0,412371743 | -0,42601649  |
| Pus7                | 0,412462312 | 0,905388514  |
| Rdh14               | 0,412555451 | -0,318018595 |
| Slc35a4             | 0,412574481 | 0,524948756  |
| Kiaa1522            | 0,412664156 | 0,576572418  |
| Prkar2a             | 0,412928773 | -0,349302292 |
| Actn1               | 0,41433302  | -1,219285965 |
| Txlng               | 0,414398996 | -0,140884399 |
| Arfgap1             | 0,414486995 | -0,237044652 |
| Sod3                | 0,414511599 | 0,345253627  |
| Agfg1               | 0,414726817 | 0,449441274  |
| Mtpap               | 0,414912621 | -1,266091665 |
| App                 | 0,415046009 | -0,234960556 |
| Tigar               | 0,415175955 | 1,107114156  |
| Msra                | 0,415300375 | 0,369889577  |
| Ttn                 | 0,415600876 | -0,700719833 |
| Fam98b              | 0,415671044 | -0,240730921 |
| Itgb2               | 0,41580125  | -0,279110591 |
| Ca13                | 0,415931229 | 0,413525263  |
| Asns                | 0,417015933 | 0,85534668   |
|                     | 0,41713554  | -0,545424779 |
| Rap1a               | 0,417893225 | 0,37367185   |
| Nutf2               | 0,418223471 | 0,324767431  |
| Gpr89a              | 0,418638378 | 0,768875758  |
| Elavl1              | 0,418654613 | 0,210800171  |
|                     | 0,418714063 | 0,437018712  |
| S100a10             | 0,4187199   | -0,400634766 |
| Atp6v1h             | 0,419794393 | -0,310129166 |
| Chid1               | 0,419894147 | -0,395217896 |
| Igkv6-13;lgk-V19-17 | 0,41992521  | -0,974903107 |
| Wdr11               | 0,419953908 | 0,989301682  |
| Cyp2s1              | 0,419965142 | -0,341199875 |
| Rpl35a              | 0,420001245 | 0,500665029  |
| Pex3                | 0,420041058 | 0,378342946  |
| Serpina1d           | 0,422552239 | -0,433909734 |
| Cdc42               | 0,423664283 | 0,196659724  |
| Comtd1              | 0,423891858 | -0,338186264 |
| Tbcel               | 0,424134203 | -0,987423579 |
| Erlin2              | 0,425160248 | -0,225384394 |
| Aktip               | 0,425204595 | -0,953687668 |
| Pelp1               | 0,426191186 | -0,410961151 |
| Aoc3                | 0,426607509 | 0,232106527  |

Table S2.

|                 |             |              |
|-----------------|-------------|--------------|
| Tnpo2           | 0,426935484 | -1,289178212 |
| Mia3            | 0,427275659 | -0,238311768 |
| Mapre1          | 0,427425914 | 0,295574188  |
| Gimap7          | 0,429933685 | 0,564884186  |
| Ppp2r5e         | 0,430742255 | 0,377157847  |
| Sfr1            | 0,430907402 | -0,181383133 |
| Aak1            | 0,430978644 | -0,275613149 |
| Gtpbp1          | 0,431077399 | 0,3375295    |
| Phb2            | 0,431412129 | 0,254641215  |
| H2-DMb2;H2-DMb1 | 0,432320445 | -1,07215627  |
| 2210010C04Rik   | 0,432324057 | 1,068652471  |
| Iglv1;Iglv2     | 0,432330139 | -2,242471695 |
| Prkab1          | 0,433245598 | 1,189933777  |
| Lonp2           | 0,433250927 | 0,456126531  |
| Cdc16           | 0,433361334 | -0,58403333  |
| BC017158        | 0,434874961 | -0,442171097 |
| Cdkl3           | 0,435012346 | -1,107988993 |
| Gapdh           | 0,435111385 | 0,500343959  |
| Cdk2ap1;Cdk2ap2 | 0,435228871 | -0,298999786 |
| Rcc2            | 0,436948504 | 0,289543788  |
| Med30           | 0,437406471 | -0,900649389 |
| Gm766           | 0,437499383 | -0,383785248 |
| Ppfibp1         | 0,437898953 | -1,118992488 |
| Lin7a           | 0,438158203 | 0,878181458  |
| Gfm2            | 0,438184729 | -0,270766576 |
| Wdr43           | 0,438277795 | 0,365732193  |
| Timm17a         | 0,439289846 | 0,230939229  |
| Ggh             | 0,440068902 | 0,394726435  |
| Hp              | 0,441056581 | 1,506397247  |
| Nt5c            | 0,441821088 | -0,293900808 |
| Echdc2          | 0,441857406 | 0,716348012  |
| Pfkfb4;Pfkfb1   | 0,441871582 | -0,526673635 |
| Gnb4            | 0,442058968 | -0,393059413 |
| Lmnb2           | 0,442425545 | 0,204229991  |
|                 | 0,44263229  | 0,601307551  |
| Ermp1           | 0,442741945 | -0,320034027 |
| Igsf5;Pcp4      | 0,442886231 | -0,74567922  |
| Camsap3         | 0,443022086 | 0,42493693   |
| Eef2k           | 0,443509503 | -0,51127243  |
| Pacsin2         | 0,445129022 | -0,222700755 |
| Tpp1            | 0,445723039 | 0,412412643  |
| Ufl1            | 0,445876876 | -0,417983373 |
| Ggt1            | 0,445905695 | -0,789393743 |
| Dpm1            | 0,446170694 | 0,248294195  |
| Gm3336          | 0,44619951  | 1,152997971  |
| Rnase4          | 0,446252831 | 0,637399673  |
| Mydgf           | 0,446265443 | 0,410044988  |
| Pnpo            | 0,446403911 | 0,312261581  |
| Hdac6           | 0,446432284 | 0,514866511  |
| Gemin5          | 0,44646088  | -0,436876933 |
| Dhx15           | 0,447064142 | -0,233110428 |
| Ak3             | 0,448020763 | -0,161066691 |

Table S2.

|               |             |              |
|---------------|-------------|--------------|
| Akr1b10       | 0,448087912 | -0,282057444 |
| Nsun2         | 0,448257553 | -0,185070674 |
| Atp6v1f       | 0,448672361 | 0,36312294   |
| Cyfip1;Cyfip2 | 0,44895029  | -0,283021291 |
| Hsd11b1       | 0,449162195 | 0,299423218  |
| Rab7a         | 0,449294727 | 0,171468735  |
| Poldip2       | 0,449469835 | 0,256410599  |
| Hrg           | 0,449572952 | 1,140778859  |
| Slc6a19       | 0,450056029 | 0,337697983  |
| Pex14         | 0,450425571 | -0,35012118  |
| Eif3a         | 0,451319537 | 0,265963236  |
| Mogat2        | 0,451383024 | -0,258757909 |
| Akt1          | 0,45263382  | 0,372530619  |
| Ndufv2        | 0,452745515 | 0,324839274  |
| L1cam         | 0,453380735 | 0,278181076  |
| Ssh3          | 0,453387234 | 0,7883358    |
| Camk2b        | 0,453648846 | -0,35338974  |
| Ddt           | 0,453802612 | -0,582137426 |
| Bpgm          | 0,453804493 | -0,301151276 |
| Kiaa2013      | 0,455694175 | 0,125275294  |
| Renbp         | 0,455784046 | 0,909941355  |
| Mcm2          | 0,455832473 | -0,241921107 |
| Agfg2         | 0,456141904 | 0,506214142  |
| Tcirg1        | 0,456278872 | -0,378125509 |
| Pebp1         | 0,456385455 | 0,22889328   |
| Nop56         | 0,456495607 | -0,221083323 |
| Dlg3          | 0,457599758 | 0,416788737  |
| Sirt2         | 0,457700787 | 0,374468486  |
| Clip1         | 0,458767927 | -0,363145192 |
| Pip           | 0,458845036 | -1,622212092 |
| Mrps2         | 0,459097399 | 0,715054194  |
| Osbp          | 0,459153567 | -0,205394745 |
| Rpl30         | 0,45929241  | -0,276437759 |
| Ddx42         | 0,460614083 | 1,301659266  |
| Irf3          | 0,460952266 | 0,41353035   |
| Hcls1         | 0,461756569 | 0,352096558  |
| Snrpa1        | 0,462318841 | 0,278120041  |
| Bpifa2        | 0,463269544 | -1,447580973 |
| Bcs1l         | 0,464032589 | -0,263270696 |
| Nit2          | 0,464309732 | 0,288466771  |
| Rasa1         | 0,464326703 | -1,244713465 |
| Asun          | 0,464332831 | 0,667570114  |
| Tom1l1        | 0,464441496 | -0,476675034 |
| Rdh10         | 0,464566265 | -0,388587316 |
| Ciapin1       | 0,464581599 | 0,246822357  |
| Lclat1        | 0,465405601 | -0,407564799 |
| Nudt12        | 0,465454545 | -0,455058416 |
| Nans          | 0,466716005 | -0,262679418 |
| Ptpn11        | 0,466856455 | -0,195241928 |
| Nudt16l1      | 0,46718797  | -0,211971283 |
| H2afy         | 0,46725436  | 0,206424713  |
| Urah          | 0,467464983 | 0,422598521  |

Table S2.

|                      |             |              |
|----------------------|-------------|--------------|
| Nmt2                 | 0,467815182 | -0,668217341 |
| Hnf1a                | 0,467817363 | 0,598081589  |
| Cds1                 | 0,467853497 | 0,857039134  |
| Zfr                  | 0,467859544 | -0,425668081 |
| Ndufaf4              | 0,467889423 | -0,28903389  |
| Zadh2                | 0,467921922 | 0,24758021   |
| Emilin1              | 0,468013197 | -0,199693044 |
| Sdf2l1               | 0,468397001 | 0,459023158  |
| Mapre2               | 0,468647482 | -0,44785436  |
| Hprt1                | 0,46935451  | 0,245714823  |
| 1700037H04Rik        | 0,46942121  | 0,736716588  |
| Eno3                 | 0,469504642 | -0,367266337 |
| Srsf5                | 0,470738102 | -0,239775976 |
| Slc28a2;Gm14085      | 0,470746858 | 0,340195338  |
| Mrpl27               | 0,470782036 | 0,447689692  |
| Sars2                | 0,470842955 | -0,334571203 |
| Arf5                 | 0,471017334 | -0,311126709 |
| Tcaf2                | 0,471057066 | 0,341019948  |
| Mcm3                 | 0,471117489 | -0,275454203 |
| Gale                 | 0,47112201  | 0,449735641  |
| Tgfb1                | 0,47221147  | 0,224793752  |
| Tbrg4                | 0,473455957 | 0,341790517  |
| Kdelr1;Kdelr2;Kdelr3 | 0,473629364 | -0,605950673 |
| Cygb                 | 0,473770746 | -0,375486374 |
| Commd10              | 0,474229508 | 0,372020721  |
| Scly                 | 0,474339893 | -0,368531545 |
| Pex11b               | 0,474400239 | -0,362223943 |
| Atp5o                | 0,47446778  | 0,242221832  |
| Cherp                | 0,474697259 | 0,280371348  |
| Uso1                 | 0,474903783 | -0,182067871 |
| Ca9;Car9             | 0,475249777 | -0,936072032 |
| Bst1                 | 0,475360334 | -0,650892893 |
| Snrnp40              | 0,475865516 | 0,294686     |
| Cutc                 | 0,476007143 | -0,434448242 |
| Tfrc                 | 0,476539994 | -0,271729151 |
| Ada                  | 0,476582986 | 0,364198049  |
| Tmem30b              | 0,476678954 | -0,360249201 |
| Sntb1                | 0,477544131 | 0,701172511  |
| Ldha                 | 0,477809863 | 0,199760437  |
| Cldnd1               | 0,477959014 | -1,275787354 |
| Mpc1                 | 0,478978925 | -0,278661092 |
| Gar1                 | 0,478998812 | -0,315034866 |
| Gcn1l1               | 0,479246738 | -0,171480179 |
| Scfd2                | 0,479264967 | -0,371271769 |
| Qil1                 | 0,479290208 | 0,341913223  |
| Golga2               | 0,479305844 | -0,199740092 |
| Coro1c               | 0,479306256 | 0,236334483  |
| Pcyt2                | 0,480867556 | -0,241723378 |
| Pbdc1                | 0,480981043 | 0,305855433  |
| Mecp2                | 0,481297009 | 0,332583745  |
| Csk                  | 0,481469822 | -0,400283178 |
| Vcpip1               | 0,481581533 | -0,389796575 |



Table S2.

|               |             |              |
|---------------|-------------|--------------|
| Gm7075;Rnf7   | 0,481608991 | -0,422021866 |
| F2            | 0,481666075 | 0,930229823  |
| Xpnpep1       | 0,481718002 | -0,17277654  |
| Ckap5         | 0,481860438 | -0,186740239 |
| Mesdc2        | 0,482885343 | 0,278191249  |
| Tbca          | 0,483342984 | -0,223597209 |
| Tfip11        | 0,483896043 | -0,359904607 |
| Hnrnpk;Gm7964 | 0,484089755 | -0,20837911  |
| Tmed10        | 0,484403778 | 0,332926432  |
| Gm10036;Rpl11 | 0,484920626 | 0,176439285  |
| Ccdc134       | 0,485015929 | 0,279955546  |
| Ighv1-81      | 0,485076968 | -0,615528107 |
| Tbc1d23       | 0,487711085 | -0,563741048 |
| Uqcrc2        | 0,488022392 | -0,195982615 |
| Slc9a3r2      | 0,488056587 | 0,411963781  |
| Rbm14         | 0,488659794 | -0,175106684 |
| Grhpr         | 0,489261919 | 0,300899506  |
| Ctbp1         | 0,489311746 | -0,442443848 |
| Il16          | 0,489312132 | 0,419027964  |
| Prodh         | 0,489794645 | -0,256802877 |
| Avl9          | 0,489972361 | -0,336743673 |
| Rhoc          | 0,489985882 | 0,432734807  |
| Cnot3         | 0,490085832 | -0,210604986 |
| Cdk18         | 0,491132785 | -0,536357244 |
| Ecm1          | 0,491250073 | 0,471426646  |
| Tes           | 0,491471366 | 0,239110947  |
| Tsta3         | 0,491874376 | 0,235835393  |
| Slc22a18      | 0,491978861 | -0,459346771 |
| Ctif          | 0,492007042 | -0,383244197 |
| Enpp1         | 0,492204165 | -0,283857981 |
| Map7d1        | 0,492308504 | 0,3885053    |
| Sdhb          | 0,492501906 | 0,222210566  |
| Pcx;Pc        | 0,492994138 | 0,247048696  |
| Hrsp12        | 0,49309581  | 0,957523982  |
| Cycs;Gm10108  | 0,493490334 | 0,264844259  |
| Gphn          | 0,494663543 | -0,167159398 |
| Ddx39b        | 0,494968119 | -0,221529643 |
| Lrrc1         | 0,495049737 | -0,846175512 |
| Mrpl28        | 0,495183626 | -0,366347631 |
|               | 0,495194615 | 0,295095444  |
| Cox7c         | 0,495339578 | -0,303372065 |
|               | 0,495826951 | 0,362889608  |
| Gnas          | 0,495909994 | -0,257303238 |
| Zfp11         | 0,496028046 | -0,260698954 |
| Fabp5         | 0,496478972 | 0,509791692  |
| Ighm          | 0,496615474 | 0,358008703  |
| Mrvi1         | 0,496855309 | -0,306241353 |
| Gipc1         | 0,497000292 | 0,583847046  |
| Phgdh         | 0,497013707 | 0,834269206  |
| Uqcrc1        | 0,497145359 | 0,19077301   |
| Nudcd1        | 0,497519091 | 1,101846695  |
| Csnk2a2       | 0,49762449  | -0,238188426 |

Table S2.

|               |             |              |
|---------------|-------------|--------------|
| Alg2          | 0,498016895 | 0,497067134  |
| Fbxo22        | 0,498097902 | -0,280380249 |
| Trappc5       | 0,498112988 | -0,201721827 |
| Trappc3       | 0,498283552 | -0,284946442 |
| Atpaf2        | 0,49837369  | -0,304002126 |
| Pet100        | 0,499197208 | -0,285909017 |
| Tm9sf3        | 0,499249345 | -0,278441747 |
| Rab25         | 0,499255598 | 0,33078893   |
| Retsat        | 0,499877907 | -0,402711868 |
| Sardh         | 0,500305725 | 1,645056407  |
| Cops7a        | 0,500482278 | 1,363150915  |
| Prpf31        | 0,500602787 | -0,218781789 |
| Egfr          | 0,500612257 | 0,272743225  |
| Necap2        | 0,500617707 | 0,293680191  |
| Tuba1a;Tuba3a | 0,501536854 | 0,440869649  |
| Pnliprp1      | 0,502273281 | 1,121214549  |
| Ankrd28       | 0,502276602 | -0,334990184 |
| Pls3          | 0,502307425 | -0,189141591 |
| Atp6v1a       | 0,502683662 | -0,231428782 |
| Coq7          | 0,502740075 | -0,371116002 |
| Tex10         | 0,50274087  | 0,423133214  |
| Arhgef7       | 0,503103388 | 0,19832929   |
| Larp4         | 0,503798553 | -0,228020986 |
| Aimp2         | 0,503865663 | 0,209306717  |
| Mon1a         | 0,504097222 | 0,83616066   |
| Gnl3          | 0,505000868 | -0,302305857 |
| 9030624J02Rik | 0,505355697 | 0,396425247  |
| Cacna2d1      | 0,507624169 | -0,395254135 |
| Atp5f1        | 0,508315607 | -0,165385564 |
| Ksr1          | 0,508364057 | -0,977561315 |
| Iars          | 0,508476025 | -0,282332102 |
| Frmd8         | 0,509073283 | 0,565087001  |
| Edc4          | 0,509140878 | -0,184147517 |
| Fkbp5         | 0,509154401 | -0,260181427 |
| Gspt1         | 0,509287901 | -0,209735235 |
| Fam107b       | 0,509599077 | 0,444765091  |
| Tll12         | 0,510858461 | -0,256198247 |
| Prpf38b       | 0,510904268 | -0,176681519 |
| Nars          | 0,511453602 | 0,271544774  |
| Bcat2         | 0,511703832 | 0,819696426  |
| Hk2           | 0,511746544 | -0,188023249 |
| Clptm1        | 0,513145983 | 0,295618057  |
| Rmdn3         | 0,51327733  | -0,182617188 |
| Gnpnat1       | 0,51336518  | 0,298274358  |
| Clec3b        | 0,513487622 | 0,219486872  |
| Hnrnp1        | 0,513686511 | -0,142737071 |
| Gpt           | 0,513820587 | -0,24587822  |
| Lmo7          | 0,514490371 | 0,274012248  |
| Spcs3         | 0,514572824 | 0,377768834  |
| Mri1          | 0,514590805 | 0,235603333  |
| Odr4;BC003331 | 0,51534865  | 0,517477671  |
| Stk38         | 0,515908125 | -0,207382838 |

Table S2.

|          |             |              |
|----------|-------------|--------------|
| Erp27    | 0,516005741 | 2,439297994  |
| Nup188   | 0,516215782 | -0,474246343 |
| Stt3a    | 0,51641411  | 0,334780375  |
|          | 0,516415376 | 1,067985535  |
| Atxn3    | 0,516771789 | -0,458895365 |
| Sil1     | 0,517404414 | 0,245586395  |
| Gart     | 0,517410484 | -0,14135615  |
| Dnajc8   | 0,51749341  | 0,203748067  |
| Aldh2    | 0,518372745 | -0,256170909 |
| Dhx32    | 0,518438717 | 0,611855189  |
| Ppap2b   | 0,518439611 | -0,327243805 |
| Lpcat2   | 0,518723891 | -0,383043289 |
| Ndufb5   | 0,519065217 | -0,150066376 |
| Rangap1  | 0,519653417 | 0,175919215  |
| Gng12    | 0,519732419 | -0,203922908 |
| Pigg     | 0,520561303 | -0,253341675 |
| Htra2    | 0,521748571 | 0,991465251  |
| Mlec     | 0,523098543 | 0,231323878  |
| Eya3     | 0,523700828 | -0,328422546 |
| Mrps25   | 0,523716733 | -0,26114591  |
| Lgl2     | 0,523805936 | 0,22140185   |
| Ighv1-76 | 0,523824401 | 0,557415009  |
| Bak1     | 0,523944112 | -0,188971837 |
| Hnrnpc   | 0,524061609 | -0,19124349  |
| Zak      | 0,524123252 | 0,258447647  |
| Rasip1   | 0,524303048 | 0,458147049  |
| Mief1    | 0,524323739 | 0,93680954   |
| Arl1     | 0,524352137 | -0,503447851 |
| Opa1     | 0,524508967 | 0,185248693  |
| Aimp1    | 0,524596811 | -0,201244354 |
| Rrm2     | 0,525361411 | 0,480868022  |
| Tor1aip1 | 0,525741404 | 0,165790558  |
| Sdf2     | 0,525746303 | 0,259910583  |
| Mecr     | 0,525758317 | -0,201843262 |
| Sec13    | 0,52581353  | -0,210005442 |
| Nup155   | 0,525857183 | -0,180024465 |
| Antxr2   | 0,526694295 | -0,519858042 |
| Ndufb9   | 0,526713231 | 0,160202026  |
| Kin      | 0,526831014 | 0,751804352  |
| Sec63    | 0,526948864 | -0,242293676 |
| Armc8    | 0,527832009 | -0,229338328 |
| Adck4    | 0,528167943 | -0,450318019 |
| Fam129a  | 0,528250709 | 0,460041682  |
| Gatad2b  | 0,528371988 | -0,230107625 |
| Mtif2    | 0,52926644  | -0,286109924 |
| Bre      | 0,529526778 | 0,699172974  |
| Mtco2    | 0,529684509 | 0,352705638  |
| Itgb4    | 0,529737259 | 0,180510839  |
| Fbln1    | 0,529745042 | 0,225777944  |
| Abhd11   | 0,529803056 | 0,313053131  |
| Lancl2   | 0,529869307 | -0,244648616 |
| Ptpn1    | 0,529879423 | -1,055555979 |

Table S2.

|          |        |             |              |
|----------|--------|-------------|--------------|
| Iscu     |        | 0,529942308 | -0,19813029  |
| Fuom     |        | 0,53054566  | -0,229005178 |
| Dmd      |        | 0,531972874 | 0,153118134  |
| Trim26   |        | 0,532123233 | -0,257527669 |
|          | Sep-09 | 0,533048829 | 0,358904521  |
| Narfl    |        | 0,533071711 | 0,276375453  |
| Prep     |        | 0,533150282 | -0,189291    |
| Set      |        | 0,533165772 | 0,359439214  |
| Dym      |        | 0,533387479 | -0,407929103 |
| Pitpna   |        | 0,53344921  | -0,170871735 |
| Cyb5r1   |        | 0,533537941 | 1,078879674  |
| Pwp1     |        | 0,533632929 | -0,165496826 |
| Cfh      |        | 0,533674183 | 0,43046697   |
| Thy1     |        | 0,534531417 | -0,343574524 |
| Ctrl     |        | 0,535291467 | 0,978830973  |
| Hacd3    |        | 0,53532507  | -0,233920415 |
| Atp6ap1  |        | 0,535468468 | -0,331782659 |
| Wtap     |        | 0,536108078 | -0,551833471 |
| Pck2     |        | 0,536348805 | 0,384498596  |
| Chmp6    |        | 0,536398424 | -0,383544922 |
| Tstd1    |        | 0,536937869 | 0,443335215  |
| Farsa    |        | 0,537021372 | -0,202607473 |
| Farp1    |        | 0,537162124 | -0,217502594 |
| Ankfy1   |        | 0,537245644 | 0,126676559  |
| Psemb3   |        | 0,537822572 | -0,264246623 |
| Phyh     |        | 0,537912946 | -0,527332942 |
| Pon3     |        | 0,537937079 | 0,160016378  |
| Psmg1    |        | 0,538071288 | -0,165772756 |
| Vma21    |        | 0,539790123 | -0,168787638 |
| Lad1     |        | 0,540030286 | 0,346988042  |
| Nnt      |        | 0,54009425  | 1,20874087   |
| Elovl6   |        | 0,540472962 | 0,35881424   |
| rp9      |        | 0,540572549 | -0,467664719 |
| Mob2     |        | 0,540573031 | 0,229386648  |
| Mbnl1    |        | 0,540573991 | -0,24221611  |
| Papss1   |        | 0,540590311 | 0,278526306  |
| Sucla2   |        | 0,542927212 | -0,19963328  |
| Pum2     |        | 0,543006997 | -0,369972865 |
| Mon1b    |        | 0,544440963 | -0,236054103 |
| Galnt7   |        | 0,544523636 | -0,217685699 |
| Surf1    |        | 0,545644295 | 0,248245239  |
| Scamp3   |        | 0,54610232  | -0,33808581  |
| Eef1a1   |        | 0,548347098 | 0,174404144  |
| Fam83b   |        | 0,548462183 | 0,296090444  |
| Polr2c   |        | 0,548494696 | -0,333838781 |
| Rps16    |        | 0,548506428 | 0,21373113   |
| Atp6v0a1 |        | 0,548600279 | -0,236499786 |
| Ccdc93   |        | 0,548601227 | -0,365527471 |
| Cldn3    |        | 0,548603122 | 0,291240692  |
| Cops7b   |        | 0,548647864 | 0,83653005   |
| Trappc11 |        | 0,548649162 | -0,176938375 |
| Hspa4    |        | 0,548669083 | -0,145807902 |

Table S2.

|                   |             |              |
|-------------------|-------------|--------------|
| Tinag             | 0,548685108 | -0,251805623 |
| Fblim1            | 0,548818258 | 0,47717158   |
| Ngly1             | 0,548860802 | 0,356608073  |
| P2rx4             | 0,548976045 | 0,431471507  |
| Gpr180            | 0,549013645 | -0,920963923 |
| Actn1             | 0,549075125 | 0,201972961  |
|                   | 0,549129005 | -0,538473129 |
| Myo18a            | 0,550191933 | 0,148681005  |
| Scpep1            | 0,550385321 | 0,268940608  |
| Epcam             | 0,550390434 | 0,332129161  |
| Uap1l1            | 0,550707744 | -0,283220291 |
| Hnrnpf            | 0,550732574 | -0,116072337 |
| Dcxr              | 0,550757433 | 0,333238602  |
| Eef1g             | 0,550802887 | 0,219394684  |
| Rab8b             | 0,55080378  | -0,224632263 |
| Anapc1            | 0,550854444 | -0,375785828 |
| Abcb7             | 0,551353121 | -0,25544548  |
| Smu1              | 0,551466741 | 0,275749842  |
| Map1b             | 0,551477248 | -0,294733683 |
| Mrpl55            | 0,551484336 | 0,426198959  |
| Timm8a1           | 0,551505269 | 0,274816513  |
| Acadl             | 0,55167304  | -0,235720317 |
| Sec62             | 0,552990582 | 0,388376236  |
| Wdfy1             | 0,553896428 | -0,273490906 |
| Mocs2             | 0,554674419 | -0,353516261 |
| Pdk3              | 0,554835177 | -0,242026011 |
| Oas1g;Oas1a       | 0,554893499 | 0,1762441    |
| Fdxr              | 0,554915329 | -0,251324336 |
| Snd1              | 0,554922864 | 0,446987152  |
| Eif1;Eif1b        | 0,554997236 | 0,156276067  |
| Hscb              | 0,555068918 | -0,287087123 |
| Nbas              | 0,555285991 | -0,277432124 |
| Ufc1              | 0,555411212 | -0,288478216 |
| Eif2s2            | 0,555498343 | 0,256955465  |
| Cct3              | 0,5556455   | -0,126411438 |
| Tspan13           | 0,55642727  | 0,214901606  |
| Yif1b             | 0,556533113 | -0,439161301 |
| Gtf2f2            | 0,556814345 | 0,162824631  |
| Rnh1              | 0,556895753 | 0,207584381  |
| Ighv5-15;Ighv5-12 | 0,556981527 | -0,994204203 |
| Cd34              | 0,557644983 | -0,199292501 |
| Cetn2             | 0,557739322 | -0,226844152 |
| Pea15;Pea15a      | 0,558540347 | 0,393421173  |
| Pdcd5             | 0,558665565 | 0,188634237  |
| Srp54;Srp54c      | 0,559162996 | -0,33391571  |
| Sco2              | 0,559311863 | -0,226483663 |
| Ddx27             | 0,559531224 | -0,383913676 |
| Gm21970;Il10rb    | 0,559685195 | -0,263799032 |
| Tpt1              | 0,559709651 | -0,15319252  |
| Prdx2             | 0,559713971 | 0,133666992  |
| Rras              | 0,560708081 | 0,179833094  |
| Numa1             | 0,561086013 | -0,172122955 |

Table S2.

|                       |             |              |
|-----------------------|-------------|--------------|
| Casz1                 | 0,56162373  | -0,273819606 |
| Marcksl1              | 0,561647253 | 0,353116989  |
| Lims2                 | 0,561771068 | -0,260624568 |
| Clps                  | 0,561837452 | 0,787939072  |
| Ubac1                 | 0,563106476 | -0,730862935 |
| Mark3;Mark1           | 0,563293472 | 0,17415301   |
| Edf1                  | 0,563448011 | 0,312366486  |
| Eif3m                 | 0,564025226 | 0,308970769  |
| Lsr                   | 0,564808114 | 0,962148031  |
| Pgrmc2                | 0,565656344 | -0,208094915 |
|                       | 0,566543562 | 0,508555573  |
| Uba3                  | 0,567688013 | -0,314078013 |
| Dguok                 | 0,567784287 | 0,633820852  |
| Pofut1                | 0,567903588 | -0,320386887 |
| Mdp1                  | 0,567939759 | -0,095352173 |
| Vrk1                  | 0,568182564 | 0,215025584  |
| Ndufs1                | 0,56833789  | 0,123901367  |
| Akap8                 | 0,568437517 | 0,272228241  |
| Adam10                | 0,568535011 | -0,245742798 |
| Phf5a                 | 0,568571272 | 0,295017242  |
| Kras                  | 0,569198907 | -0,099529266 |
| Igkv17-127;lgkv17-121 | 0,56953947  | -0,808781306 |
| Rhot2                 | 0,569894047 | 0,247555415  |
| Mtif3                 | 0,570330786 | 0,348930359  |
| Ywhah                 | 0,570383629 | -0,187074025 |
| Snrpa                 | 0,570486486 | 0,248343786  |
| Ipo9                  | 0,571875614 | -0,231261571 |
| Ufsp2                 | 0,57241778  | -0,342674255 |
| Mrpl13                | 0,572737186 | -0,315054576 |
| Gfm1                  | 0,573161079 | -0,121586482 |
| Ap1g2                 | 0,57333842  | -0,291154226 |
| Gm27029;Aarsd1        | 0,573451376 | -0,123760223 |
| Hnrnpd                | 0,574592593 | 0,217372259  |
| Serpina6              | 0,575348938 | -0,409378052 |
| Pam16                 | 0,575357473 | 0,328452428  |
| Lgals8                | 0,575978231 | -0,357843399 |
| Gorasp2               | 0,576932535 | 0,345208486  |
| Eps15                 | 0,57715529  | -0,111544927 |
| Slc3a2                | 0,578362599 | -0,209421794 |
| Pxmp4                 | 0,578519848 | -0,43927002  |
| Lypla1                | 0,579666757 | 0,27498881   |
| Gsk3a                 | 0,579710334 | -0,261322021 |
| Tmem254b;Tmem254      | 0,579722041 | -0,443962097 |
| Podxl                 | 0,579733913 | -0,311505    |
| Mrps5                 | 0,579867607 | -0,246353785 |
| Rpl5                  | 0,579891363 | 0,187711716  |
| Hkdc1                 | 0,5799      | -0,241597493 |
| Birc6                 | 0,579903287 | -0,18473053  |
| Enpp3                 | 0,58005423  | -0,333608627 |
| Rbms3;Rbms1           | 0,580259149 | 0,417753855  |
| Uchl5                 | 0,580335861 | 0,310891469  |
| Muc2                  | 0,58037605  | 0,222124736  |

Table S2.

|          |        |             |              |
|----------|--------|-------------|--------------|
| Copg1    |        | 0,580385908 | -0,170196533 |
| Ddx1     |        | 0,580719198 | -0,132740657 |
| Arpc4    |        | 0,58116405  | -0,20761172  |
| Cela3b   |        | 0,581434289 | 0,892029444  |
| Slco2a1  |        | 0,581456316 | -0,296319326 |
| Cnot7    |        | 0,581494589 | 0,777851105  |
| Kpna3    |        | 0,581514479 | 0,386401494  |
| Psm2     |        | 0,582806164 | 0,124015172  |
| Sptan1   |        | 0,583620541 | -0,118631999 |
| Plin4    |        | 0,583647758 | -0,141949972 |
| Yrdc     |        | 0,583771954 | -0,568049749 |
| Atxn10   |        | 0,584373751 | -0,356920242 |
| Cab39l   |        | 0,584412527 | 0,720916748  |
| Anp32a   |        | 0,586466937 | -0,165981929 |
|          | Sep-15 | 0,586829242 | 0,141075134  |
| Fam49a   |        | 0,586900162 | 0,338784536  |
| Ola1     |        | 0,586950378 | -0,12586085  |
| Tceb1    |        | 0,587433962 | 0,215970357  |
| Osbpl9   |        | 0,587592343 | 0,600814184  |
| Ptgfrn   |        | 0,589076716 | 0,180250804  |
| Immt     |        | 0,589111948 | -0,118648529 |
| Nomo1    |        | 0,5892311   | 0,167427063  |
| Flad1    |        | 0,589235326 | -0,400866191 |
| Nat2     |        | 0,5892432   | -0,295742035 |
| Rela     |        | 0,589289871 | 0,402523041  |
| Rbm47    |        | 0,589331178 | -0,196406047 |
| Hspa1a   |        | 0,589743011 | 0,171162923  |
| Ptdss1   |        | 0,589784467 | -0,302958806 |
| Blvra    |        | 0,58984028  | -0,159193675 |
| Tor1aip2 |        | 0,589852609 | 0,167844137  |
| Plekha5  |        | 0,590162278 | 0,573602041  |
| Sdcbp    |        | 0,590598979 | -0,242270152 |
| Tm9sf4   |        | 0,591567132 | -0,21624438  |
| Ik       |        | 0,592115973 | 0,170866013  |
| Mocs3    |        | 0,593928073 | 0,850441615  |
| Lrrc19   |        | 0,594482426 | -0,51383845  |
| Anxa2    |        | 0,594717811 | 0,127581278  |
| Ktn1     |        | 0,595231966 | 0,172198613  |
| Cbfb     |        | 0,596030027 | 0,284105937  |
| Pla2g16  |        | 0,597320118 | -0,275973638 |
| Arsb     |        | 0,59744373  | 0,437362035  |
| Trim14   |        | 0,597451622 | 0,269408544  |
| Cox7a1   |        | 0,597710308 | 0,212899526  |
| Atic     |        | 0,59772255  | 0,262667974  |
| Exosc2   |        | 0,5977308   | 0,881070455  |
| Sf3a3    |        | 0,597827715 | -0,175153732 |
| Aldh7a1  |        | 0,597862955 | 0,715874354  |
| Ndufv1   |        | 0,598006954 | 0,180351257  |
| Kbtbd11  |        | 0,598158781 | -0,282758713 |
| Atl3     |        | 0,598294118 | -0,134284973 |
| Tomm6    |        | 0,598324339 | 0,168457667  |
| Fryl     |        | 0,598428648 | -0,264772415 |

Table S2.

|               |             |              |
|---------------|-------------|--------------|
| Dhdh          | 0,599035514 | -0,294413249 |
| Mtx1          | 0,599102564 | 0,164519628  |
| Cul2          | 0,599451148 | -0,157145182 |
| Blvrb         | 0,599885836 | -0,390753428 |
|               | 0,599922071 | -0,798914591 |
| Dido1         | 0,599932764 | -0,197134018 |
| Ubfd1         | 0,600180267 | -0,225692749 |
| Cdx2          | 0,600360341 | 0,429998398  |
| Lias          | 0,600394561 | 0,258335749  |
| Vta1          | 0,601985083 | 0,215398788  |
| Nfkb2         | 0,602048495 | 0,662285487  |
| Trappc9       | 0,603587124 | 0,233968099  |
| Usp8          | 0,603616511 | 0,385192235  |
| D10Jhu81e     | 0,603625333 | 0,153208415  |
| Vps45         | 0,603748669 | 0,802303314  |
| Slc12a2       | 0,603758318 | 0,213331858  |
| Mrpl3         | 0,603943647 | -0,242848078 |
| Herpud1       | 0,604031915 | 0,418100357  |
| Mbd2          | 0,604043605 | 0,188158671  |
| Itga2         | 0,604127558 | -0,304072062 |
| Mccc1         | 0,604179596 | -0,292362849 |
| Tjp3          | 0,60421992  | -0,180476507 |
| Exosc7        | 0,604398301 | -0,160479228 |
| Sncg          | 0,60460828  | 0,211444219  |
| Cpt2          | 0,604708256 | -0,125923157 |
| Lman1         | 0,605188644 | 0,388484319  |
| Mrpl32        | 0,605371489 | 0,481126785  |
| Clec2h        | 0,605531937 | 0,259085973  |
| Nudt21        | 0,60554825  | 0,191591263  |
| Pisd;Gm20671  | 0,605708831 | -0,228413264 |
| Ca4;Car4      | 0,605839788 | 0,158268611  |
| Eif3g         | 0,606229404 | 0,211644491  |
| Psen1;Psen2   | 0,606998147 | 0,935774485  |
| Defa22;Defa21 | 0,607038095 | 0,407765706  |
| Farp2         | 0,607040465 | -0,167994181 |
| Mpc2          | 0,607060381 | 0,262676875  |
| Eef1e1        | 0,607090524 | -0,188442866 |
| Map2          | 0,60719873  | -0,220088959 |
| Pdia2         | 0,607586462 | 1,518774033  |
| Stxbp1        | 0,608372191 | -0,200806936 |
| Hdhd2         | 0,608527205 | -0,171413422 |
| Wdr37         | 0,608562368 | -0,704393387 |
| Qars          | 0,608660502 | -0,135787328 |
| Xpo1          | 0,609409031 | -0,136327744 |
| Chuk          | 0,609846885 | 0,530289968  |
| Hsd17b10      | 0,610272751 | -0,17031161  |
| Tmem165       | 0,610346174 | 0,340937932  |
| Urgcp         | 0,610417524 | 0,444810867  |
| Hnrnpul1      | 0,610421719 | -0,230840683 |
| Dpp7          | 0,610457806 | 0,298231125  |
| Pdk1          | 0,610529644 | 0,795936584  |
| Mrpl41;Gm6434 | 0,610582652 | 0,18626531   |



Table S2.

|                            |             |              |
|----------------------------|-------------|--------------|
| Cgref1                     | 0,610651212 | -0,385279338 |
| Prkg1                      | 0,610768501 | -0,24415652  |
| Gm1123                     | 0,611198526 | -0,230656942 |
| Hmgcs2                     | 0,612200053 | -0,18506813  |
| Rbx1                       | 0,614370526 | 0,203049978  |
| Diap2;Diaph2               | 0,615764273 | -0,379182816 |
| Rbpms                      | 0,616719621 | 0,546101888  |
| Farsb                      | 0,616871943 | 0,141444524  |
| Glyr1                      | 0,617453207 | 0,187555949  |
| Uba2                       | 0,618864652 | -0,1457208   |
| FAM120A                    | 0,620531792 | 0,129402796  |
| Entpd1                     | 0,620790123 | -0,213912964 |
| Ctnna2                     | 0,620819732 | -1,59112676  |
| Sun2                       | 0,620828782 | -0,292444229 |
| Cltb                       | 0,620849567 | 0,196655909  |
| Rdx                        | 0,620976915 | 0,191445033  |
| Ist1                       | 0,620982677 | -0,160533269 |
| Sf3a2                      | 0,622232363 | 0,41607221   |
| Rala                       | 0,622320755 | -0,233868281 |
| Spink3                     | 0,622483879 | -0,856323878 |
| Strip1;Strip2              | 0,62264709  | 0,227229436  |
| Hspbp1                     | 0,624206445 | -0,249998093 |
| Iah1                       | 0,62527187  | -0,221129735 |
| Epb4.1;Epb41               | 0,625426551 | 0,691083272  |
| Ran;1700009N14Rik          | 0,625496207 | 0,212284088  |
| Eif3k                      | 0,625502092 | -0,15547816  |
| Etf1                       | 0,625522513 | -0,14381663  |
| Tmem106a                   | 0,625636839 | -0,281630198 |
| Nde1;Ndel1                 | 0,625800576 | -0,65176328  |
| Tamm41                     | 0,627187451 | 0,261285782  |
| Ptprk                      | 0,627843219 | -0,14558665  |
| Hspa12a                    | 0,627945635 | -0,222024918 |
| Pnpla2                     | 0,627960303 | -0,565928141 |
| Scgb2b20;Scgb2b7           | 0,628027168 | -0,858594259 |
| Stom                       | 0,628159791 | -0,150265376 |
| Rad50                      | 0,629002349 | -0,245654424 |
| Snap29                     | 0,629045656 | -0,280977885 |
| Dnm1l                      | 0,62908977  | -0,116031647 |
| Rnf126                     | 0,629152843 | 0,657460531  |
| Dnaja3                     | 0,629207508 | -0,17971166  |
| Aprt                       | 0,629344459 | -0,248058955 |
| Scgb1b20;Abpa29_a7;Scgb1b3 | 0,629998436 | 0,678407669  |
| Idh2                       | 0,630872917 | 0,161963781  |
| Try5                       | 0,630880959 | 0,651139577  |
| Ndufs8                     | 0,631045336 | 0,17183876   |
| Rbm39                      | 0,631587715 | -0,158368429 |
| Zfand6                     | 0,631700312 | 0,708979925  |
| Uggt1                      | 0,631725215 | 0,166301092  |
| Rmdn1                      | 0,631752148 | -0,224752426 |
| Cr1l                       | 0,633187419 | -0,15496254  |
| Aqp11                      | 0,633234529 | -0,386834462 |
| Hspa2                      | 0,633260858 | 0,166266759  |

Table S2.

|               |             |              |
|---------------|-------------|--------------|
| Inpp1         | 0,634356976 | -0,218782425 |
| Deptor        | 0,63445738  | 0,325006485  |
| Tmed9         | 0,635301818 | -0,314553579 |
| Serinc3       | 0,636186964 | -0,318609238 |
| H2afv;H2afz   | 0,636694704 | 0,253873189  |
| Abhd3         | 0,636865819 | 0,426241557  |
| Cmtm7         | 0,637529442 | 0,244915644  |
| Inpp1         | 0,6376274   | -0,191256841 |
| Cox15         | 0,638852697 | -0,252417882 |
| Eprs          | 0,639231527 | 0,146886826  |
| Ppp1r7        | 0,639861068 | -0,174694061 |
| Serpinb1a     | 0,640031096 | -0,170772552 |
| Araf          | 0,64053057  | -0,300396601 |
| Usp15         | 0,640589332 | 0,130938212  |
| Cpb1          | 0,640631961 | 0,785859426  |
| Try4          | 0,640741393 | 0,606215795  |
| Ostf1         | 0,640755694 | 0,135774612  |
| Trim47        | 0,64173868  | 0,469551722  |
| Gne           | 0,641986036 | 0,132092794  |
| Larp1         | 0,642120021 | 0,229022344  |
| Cav2          | 0,642436401 | 0,234790802  |
| Pdcl3         | 0,642647059 | -0,146855672 |
| Vps29         | 0,642723184 | -0,229746501 |
| Cps1          | 0,642736951 | -0,153539022 |
| Uqcr10        | 0,642812903 | -0,224650065 |
| Rtn4ip1       | 0,64283441  | 1,025042216  |
| Nedd4l        | 0,642866288 | -0,342741648 |
| Acadsb        | 0,643005422 | 0,152133306  |
| Rps19         | 0,643126033 | 0,187357585  |
| Prune         | 0,643262887 | 0,1710186    |
| Lsm14a        | 0,643275071 | 0,137106578  |
| Gnao1         | 0,643373904 | -0,271930695 |
| 2200002D01Rik | 0,643504772 | 0,415090561  |
| Ssfa2         | 0,644006182 | 0,201114655  |
| Hbbt1;Hbb-bs  | 0,644117495 | -0,454817454 |
| Cpa2          | 0,645117693 | 0,690178553  |
| Cog8          | 0,645487127 | 0,291737239  |
| Map4          | 0,646017499 | 0,173712413  |
| Ncor1         | 0,646153925 | -0,261372248 |
| Psmc1         | 0,646558271 | 0,196813583  |
| Taf15         | 0,646900771 | 0,331713994  |
| Camk1d        | 0,646981239 | -0,23072052  |
| Ptrf          | 0,646990741 | 0,113810857  |
| Aqr           | 0,64702261  | -0,425746918 |
| Amy2;Amy2a1   | 0,647067112 | 0,689872742  |
| Actbl2        | 0,647553159 | 0,180232366  |
| Pof1b         | 0,647578731 | 0,22392718   |
| Cnep1r1       | 0,647812067 | 0,172486623  |
| Ilkap         | 0,648030785 | 0,350497564  |
| Plp2          | 0,648068789 | -0,21397845  |
| Eif2s3x       | 0,648120092 | 0,15073204   |
| Cd47          | 0,648661708 | 0,248490651  |

Table S2.

|               |        |             |              |
|---------------|--------|-------------|--------------|
| Sdhaf2        |        | 0,648958974 | 0,407126109  |
| Psmid14       |        | 0,64970828  | -0,146575292 |
| Coro7         |        | 0,649885187 | 0,127325058  |
| Kif2a         |        | 0,650579257 | -0,221330007 |
| Reep5         |        | 0,650626697 | 0,486486435  |
| Mcm7          |        | 0,650663934 | 0,193929036  |
| Ppp2r5a       |        | 0,651107015 | -0,223526001 |
| Thumpd3       |        | 0,65155055  | -0,33257548  |
| Grpel1        |        | 0,652219038 | -0,123331706 |
|               | Mar-02 | 0,652256843 | -0,193873088 |
| Dnmt1         |        | 0,652346803 | 0,21993955   |
| Bdh1          |        | 0,653461519 | 0,118808111  |
| L7rn6;l7Rn6   |        | 0,653613497 | 0,772731145  |
| Agpat2        |        | 0,65404903  | -0,159489314 |
| Ascc3         |        | 0,654154868 | 0,721322378  |
| ligp1         |        | 0,654185999 | -0,594153722 |
| Srm           |        | 0,654216092 | 0,293463389  |
| Eps8l2        |        | 0,654259316 | 0,183840434  |
| Otulin        |        | 0,654271126 | -0,460029602 |
| Clca4b;Clca4a |        | 0,6550222   | -0,231946945 |
| Gc            |        | 0,655401478 | -0,280797323 |
| Nfib          |        | 0,655423763 | -0,204983393 |
| Magohb;Magoh  |        | 0,655590921 | 0,100406647  |
| Edem3         |        | 0,655657143 | -0,275615056 |
| Serpinb9      |        | 0,655942915 | -0,109595617 |
| Nipsnap3b     |        | 0,656299542 | -0,289168676 |
| Rps3          |        | 0,656353631 | 0,144004822  |
| C4b           |        | 0,657152024 | 0,383754094  |
| Prkacb        |        | 0,658139511 | -0,269622167 |
| Tpm3          |        | 0,658563502 | 0,556062698  |
| Commd9        |        | 0,659377099 | -0,228547414 |
| Psat1         |        | 0,659378433 | 0,71224912   |
| Tmem186       |        | 0,659405186 | -0,347771327 |
| Slc39a4       |        | 0,659461245 | 0,395018895  |
| Ogn           |        | 0,659511823 | -0,232177734 |
| Nmi           |        | 0,659546171 | -0,182157516 |
| Sestd1        |        | 0,660890808 | 0,180456161  |
| Ruvbl1        |        | 0,660975362 | -0,146385829 |
| Trappc6b      |        | 0,661036585 | -0,157524109 |
| Mtor          |        | 0,661178979 | -0,192254384 |
| Pkm           |        | 0,66148731  | -0,11112086  |
| Sepsecs       |        | 0,661541741 | -0,137475967 |
| Dynlt1        |        | 0,661795587 | -0,185529709 |
| Pold2         |        | 0,66184069  | -0,233984629 |
| Atg7          |        | 0,662706897 | 0,202102025  |
| Rplp2         |        | 0,662982003 | 0,173740387  |
| Ndufs2        |        | 0,663363567 | -0,080469131 |
| Rpl12         |        | 0,663373543 | 0,198523204  |
| Ptbp1         |        | 0,663400203 | 0,199513753  |
| Tbc1d5        |        | 0,663753986 | 0,182097753  |
| Serpinf1      |        | 0,663797417 | -0,706660589 |
| Mcts1         |        | 0,663798481 | 0,147322973  |

Table S2.

|               |             |              |
|---------------|-------------|--------------|
| Nemf          | 0,66504427  | -0,19891421  |
| Clic1         | 0,665075911 | 0,132018407  |
| Eif2b2        | 0,665749115 | 0,291962306  |
| Chchd4        | 0,667179772 | 0,189338684  |
| Lpgat1        | 0,669150657 | -0,151151021 |
|               | 0,669173616 | 0,397980372  |
| Bicd2         | 0,67014957  | -0,483226776 |
| Vps52         | 0,670285138 | -0,260418574 |
| Bco2          | 0,670338384 | -0,353249232 |
| Letmd1        | 0,670367264 | -0,352173487 |
| Scrib         | 0,670376577 | -0,107538859 |
| Fam96b        | 0,67042464  | -0,136152903 |
| Eif3h         | 0,672900101 | -0,146368663 |
| Ndc1          | 0,673493064 | -0,255071004 |
| Rprd2         | 0,674826021 | 0,542262395  |
| Aspa          | 0,67509453  | 0,298057556  |
| Crip2         | 0,675402519 | 0,171961466  |
| Scfd1         | 0,675420509 | -0,205874761 |
| Fahd2         | 0,675458669 | -0,220519384 |
| Agpat3        | 0,675953664 | 0,238541285  |
| Hells         | 0,676320161 | 0,287434896  |
| Eif2b1        | 0,676406848 | 0,184122086  |
| Tagln2        | 0,679636638 | -0,116784414 |
| Ralb          | 0,681000754 | 0,139055888  |
| Mrps27        | 0,681148893 | -0,131808599 |
| Hspa5         | 0,681187421 | 0,217834473  |
| Sh3glb1       | 0,6815636   | -0,250804901 |
| Atp6v1d       | 0,682189495 | 0,111860911  |
| Mrpl42        | 0,682298492 | 0,33848381   |
| Bag4          | 0,682528378 | -0,295501709 |
| Ergic2        | 0,682668676 | 0,181952794  |
| Isoc2a        | 0,682688755 | -0,345106761 |
| Gapdh;Gm7293  | 0,682830615 | 0,102661133  |
| Gmids         | 0,682860156 | -0,164000829 |
| Acsl4         | 0,683524335 | -0,433218002 |
| Carm1         | 0,684656132 | -0,263572693 |
| Prdx4         | 0,685319629 | -0,242822011 |
| Suz12         | 0,685462387 | 0,179875692  |
| Prss3;Gm10334 | 0,68642807  | 0,76218605   |
| Ndufa13       | 0,686914372 | -0,140775681 |
|               | 0,687032307 | -0,225687027 |
| Glt28d2;Alg13 | 0,687061122 | 0,408735275  |
| Dnaja1        | 0,687107554 | 0,121033351  |
| Rps12         | 0,687112112 | -0,223043442 |
| Mpdu1         | 0,687154366 | -0,26182429  |
| Itih5         | 0,687173967 | 0,177206675  |
| Snx6          | 0,687233275 | -0,101399104 |
| Akr1c13       | 0,687489872 | 0,180413564  |
| Gzma          | 0,687652    | -0,201313655 |
| Vps4a         | 0,688077942 | 0,230626424  |
| Prmt1         | 0,688085979 | 0,149157842  |
| Hpgd          | 0,68822089  | -0,221411387 |

Table S2.

|               |             |              |
|---------------|-------------|--------------|
| Celf2         | 0,688246753 | 0,205786387  |
| Eif2b5        | 0,688962797 | 0,242675145  |
| Rbm5          | 0,689113659 | 0,275004069  |
| Ntpcr         | 0,689215177 | 0,329163233  |
| Adrbk1;Adrbk2 | 0,689238903 | -0,167441686 |
| Pfkfb2        | 0,689259536 | -0,166980108 |
| Ube2l3        | 0,689275767 | 0,095258077  |
| Rragc;Rragd   | 0,689283113 | -0,209089279 |
| Fam210a       | 0,689308747 | 0,111310323  |
| Mob4          | 0,68939521  | 0,510439555  |
| Stag1         | 0,689449564 | -0,513538361 |
| Arhgap12      | 0,689508719 | -0,322256724 |
| Dnajc3        | 0,689583665 | 0,253413518  |
| Tars          | 0,689602191 | 0,102535248  |
| Helz2         | 0,689925889 | -0,449475606 |
| Srrt          | 0,690004975 | -0,109086355 |
| Irgq          | 0,69002887  | 0,354628881  |
| Cmtr1         | 0,69011993  | -0,34242185  |
| Ghrl          | 0,690154152 | 0,261730194  |
| Ilf3          | 0,690637832 | 0,159666697  |
| Rab1          | 0,691301193 | 0,123402913  |
| Etfhd         | 0,691384845 | -0,167320887 |
| Myo1c         | 0,691398063 | -0,08876737  |
| Smarca5       | 0,691547938 | -0,08515803  |
| Hist1h3b      | 0,691896723 | 0,164479574  |
| Ncstn         | 0,692517122 | -0,145404816 |
| Pafah1b2      | 0,692537106 | 0,525455475  |
| Eif5          | 0,69390377  | 0,128046672  |
| Lonp1         | 0,693912181 | 0,10051918   |
| Cmb1          | 0,694037661 | 0,234596888  |
| Eif2b4        | 0,694135383 | -0,160078049 |
| Kti12         | 0,694183891 | 0,349411011  |
| Prkar2b       | 0,69423996  | -0,17520841  |
| Ccdc25        | 0,694339361 | -0,18656985  |
| Stk25         | 0,694888559 | 0,329968135  |
| Sdhd          | 0,694902699 | -0,421738942 |
| Eml4          | 0,695707076 | 0,112922668  |
| Mrpl9         | 0,695747712 | 0,101596832  |
| Mycbp         | 0,695791089 | 0,121177673  |
| Col14a1       | 0,695850532 | 0,105369568  |
| Abcb11        | 0,696434224 | -1,165480932 |
| Fam32a        | 0,696643758 | 0,471188863  |
| G3bp2         | 0,697303015 | 0,174900055  |
| Higd1a        | 0,697814678 | 0,386095683  |
| Abce1         | 0,69843083  | 0,123185476  |
| Sf3b3         | 0,69877303  | 0,078613917  |
| Uqcc1         | 0,699274074 | -0,269756317 |
| Trim28        | 0,6994431   | -0,086290995 |
| Mbd3          | 0,699901283 | -0,242345174 |
| Hpca          | 0,700682782 | -0,251502991 |
| Ccar2         | 0,700728349 | -0,097869237 |
| Cmtm6         | 0,701438501 | 0,474307378  |

Table S2.

|                                   |             |              |
|-----------------------------------|-------------|--------------|
| Atp1a4                            | 0,701480276 | -0,283309937 |
| Crocc                             | 0,701601973 | 0,109761556  |
| Sphk2                             | 0,701673479 | -0,194337845 |
| Rxrg;Rxb;Rxra                     | 0,701714286 | -0,212907155 |
| Slc16a3                           | 0,701751117 | -0,2300752   |
| Yipf5                             | 0,701759487 | 0,161531448  |
| Coq9                              | 0,70216839  | -0,13381958  |
| Dnajc16                           | 0,702648289 | 0,390514374  |
| Pgl                               | 0,706653543 | 0,130110423  |
| Galt                              | 0,706771956 | 0,868728002  |
| Tbc1d22a                          | 0,708848008 | 0,171925227  |
| Camk1                             | 0,709134005 | -0,539230982 |
| Eif1a;Gm5662;Gm8300;Gm2016;Gm219: | 0,709437561 | 0,232456207  |
| Skiv2l                            | 0,709546326 | 0,429709752  |
| Ssrp1                             | 0,709867322 | 0,120447159  |
| Yy1                               | 0,710504544 | 0,149714788  |
| Mt-Cyb                            | 0,710511788 | -0,306999207 |
| Vasp                              | 0,710927906 | -0,223928452 |
| Parl                              | 0,71101203  | -0,151680628 |
| Sap30bp                           | 0,71104832  | -0,161659241 |
| Eif2b3                            | 0,711163886 | -0,192733129 |
| Dbnl                              | 0,711338405 | 0,143849691  |
| Hagh                              | 0,71135297  | -0,177384059 |
| Parn                              | 0,713288235 | 0,924811045  |
| Qsox2                             | 0,713408188 | 0,384452184  |
| Surf6                             | 0,713754472 | 0,102488836  |
| Atp2b4                            | 0,714099437 | 0,093094508  |
| Impa1                             | 0,71411269  | -0,07458051  |
| Plvap                             | 0,714565281 | 0,134501139  |
| Rars2                             | 0,714574713 | -0,206242243 |
| Src                               | 0,714641546 | -0,103245417 |
| Mavs                              | 0,714749511 | 0,201354345  |
| Sigmar1                           | 0,714786099 | -0,298131307 |
| Atg2a                             | 0,714786781 | 0,317625682  |
| Tpm1                              | 0,714850147 | 0,256328583  |
| Nipsnap1                          | 0,715251405 | -0,161144892 |
| Prpf3                             | 0,71526784  | 0,255758921  |
| Stard10                           | 0,715364459 | 0,145123164  |
| Fcho2                             | 0,71622765  | -0,216862361 |
| Nags                              | 0,716404396 | -0,484648387 |
| Ndufb6                            | 0,717321289 | -0,166190465 |
| Rab32                             | 0,717458628 | -0,12374115  |
| Cltc                              | 0,71747353  | -0,088678996 |
| Pigk                              | 0,717486579 | -0,190409978 |
| Stat5a;Stat5b                     | 0,717654634 | -0,144845327 |
| Mal2                              | 0,717956596 | -0,194396973 |
| Vps26a                            | 0,718283764 | 0,094889323  |
| Wnk1                              | 0,718724835 | -0,193321228 |
| Tmem70                            | 0,718964442 | -0,760023117 |
| Rps18;Gm10260                     | 0,719058193 | -0,170834859 |
| Rwdd1                             | 0,719112302 | -0,187877019 |
| Lactb                             | 0,719154971 | -0,199572881 |

Table S2.

|                              |             |              |
|------------------------------|-------------|--------------|
| Dpp8                         | 0,720749757 | -0,191894531 |
| Rufy1                        | 0,721556204 | 0,098836899  |
| Dtymk                        | 0,721592602 | 0,20153745   |
| Prkar1a                      | 0,72298127  | 0,106285731  |
| Slc9a1                       | 0,723047156 | -0,153689702 |
| Coa7                         | 0,723091661 | 0,304271062  |
| Ube2g1                       | 0,723107977 | 0,1809419    |
| Cyth3;Cyth2;Cyth1;Cyth4      | 0,723312758 | 0,178950628  |
| Ighv9-2;Ighv9-4;Ighv9-3      | 0,723484937 | 0,209699631  |
| Emc1                         | 0,723992227 | 0,110096614  |
| Bckdk                        | 0,724292304 | -0,250555038 |
| Rnaseh2a                     | 0,724445847 | -0,164944331 |
| Pdlim5                       | 0,725153398 | 0,173006694  |
| Eny2                         | 0,725605436 | 0,145352681  |
| Taco1                        | 0,725615721 | -0,138442357 |
| Brd4                         | 0,725816153 | 0,234495163  |
| Ppp4r1                       | 0,725903007 | -0,137663523 |
| Lrrc59                       | 0,726231273 | -0,196418762 |
| Arfgef2                      | 0,726480988 | -0,134469986 |
| Pkn1                         | 0,726619821 | 0,167648951  |
| Ifi30                        | 0,726656977 | 0,153474172  |
| Tpd52l1                      | 0,726665051 | 0,330458323  |
| Ubxn7                        | 0,727597094 | 0,198129654  |
| Marcks                       | 0,727718364 | 0,158934275  |
| Rad21                        | 0,727732752 | 0,186660767  |
| Dock6                        | 0,727873185 | 0,293495814  |
| Ubac2                        | 0,728134429 | 0,185390472  |
| Pnkp                         | 0,728235123 | 0,568265915  |
| Sgce                         | 0,728283434 | 0,234891256  |
| Ube3c                        | 0,729011827 | -0,132119497 |
| Ppm1b                        | 0,729028489 | 0,108513514  |
| Bin1                         | 0,729088626 | -0,209649404 |
| Gm7356                       | 0,729122705 | -0,922700246 |
| Gm10250;Atp5h                | 0,729138031 | -0,104612986 |
| Qdpr                         | 0,729188693 | -0,180537542 |
| Lgals1                       | 0,729283712 | 0,218999227  |
| Igkv1-110;Igkv1-99;Igkv1-115 | 0,729306261 | -0,172307332 |
| Ubxn4                        | 0,7293462   | 0,093866984  |
| Papln                        | 0,729553304 | 0,421039581  |
| Nrbp1                        | 0,729931999 | 0,68929863   |
| Setd7                        | 0,730167792 | -0,198212941 |
| Igj                          | 0,730591807 | -0,238569895 |
| Rtf1                         | 0,730642564 | -0,237826029 |
| Nhlrc2                       | 0,732185016 | -0,115586599 |
| Cpd                          | 0,732338069 | 0,086790721  |
| Txn                          | 0,732405588 | -0,101685842 |
| Plcd1                        | 0,733006259 | -0,22763443  |
| Mogs                         | 0,735121059 | -0,175443649 |
| Rpl34                        | 0,735415784 | -0,108015696 |
| Upf1                         | 0,738092855 | -0,089408239 |
| Glul                         | 0,738681097 | -0,201265971 |
| Epb4.1l4b;Epb41l4b           | 0,739636713 | -0,346607208 |

Table S2.

|                         |        |             |              |
|-------------------------|--------|-------------|--------------|
| Anxa6                   |        | 0,739693195 | 0,092992147  |
| C1qbp                   |        | 0,739754808 | 0,222302755  |
| Arhgef26                |        | 0,73978659  | 0,178430557  |
| Tvp23b                  |        | 0,740855153 | -0,127188365 |
| Dctn6                   |        | 0,740900096 | -0,230256399 |
| Ndufs7                  |        | 0,740970715 | 0,08460935   |
| Tst                     |        | 0,741006959 | 0,633543015  |
| Ppp4r2                  |        | 0,741073709 | -0,117186228 |
| Hars                    |        | 0,741582534 | -0,132858276 |
| Hdlbp                   |        | 0,743877189 | 0,208240509  |
| Use1                    |        | 0,744164988 | 0,315054576  |
| Fnbp4                   |        | 0,744395973 | -0,341359456 |
| 9530053A07Rik           |        | 0,744547591 | -1,00446256  |
| Acad10                  |        | 0,744993771 | -0,142794291 |
| Erc1;Erc2               |        | 0,745085071 | -0,161565781 |
| Gvin1                   |        | 0,746013892 | 0,126728058  |
|                         | Sep-09 | 0,746313218 | 0,140369415  |
| Rab11b                  |        | 0,746665071 | -0,108469009 |
| Ergic3                  |        | 0,746774749 | 0,146253586  |
| Lypla2                  |        | 0,746874641 | 0,176980337  |
| Chkb                    |        | 0,746880651 | 0,146287918  |
| Atp2a2                  |        | 0,747028476 | 0,063035329  |
| Spcs1                   |        | 0,747085687 | -0,339958827 |
| Ighv6-3;Ighv6-7;Ighv6-6 |        | 0,747318519 | -0,25470988  |
| Myl6                    |        | 0,747355486 | 0,113615672  |
| Cybb                    |        | 0,747373805 | 0,143015544  |
| Basp1                   |        | 0,747619775 | -0,068941752 |
| Sgk2                    |        | 0,747662685 | -0,44255956  |
| Elovl1                  |        | 0,747787011 | 0,559417725  |
| Armc10                  |        | 0,748106947 | 0,23910586   |
| S100a11                 |        | 0,748334129 | -0,078173955 |
|                         |        | 0,748419847 | -1,185801824 |
| Bcam                    |        | 0,748502028 | 0,306366603  |
| Rabgef1                 |        | 0,749731173 | -0,096324285 |
| Tjp2                    |        | 0,749750656 | -0,08555394  |
| Adprh                   |        | 0,74987506  | -0,158789953 |
| Thap4                   |        | 0,749904126 | 0,332932154  |
|                         | Mar-05 | 0,751649273 | -0,182530721 |
| Sgta                    |        | 0,753988566 | 0,073980331  |
| Sp110                   |        | 0,754987149 | 0,390570958  |
| Tnfaip8                 |        | 0,755090693 | -0,201649984 |
| Polr2a                  |        | 0,755191429 | -0,082413356 |
| Trappc6a                |        | 0,755205525 | -0,100709915 |
| Galnt3                  |        | 0,755273073 | -0,184342702 |
| Cept1                   |        | 0,755320485 | -0,107717514 |
| Col4a5                  |        | 0,75544352  | -0,372872035 |
| Creld2                  |        | 0,755445554 | 0,175306956  |
| Dynlrb1                 |        | 0,755959116 | 0,13033549   |
| Pde5a                   |        | 0,756625475 | -0,093538284 |
| Itpr2                   |        | 0,756784816 | -0,48084259  |
| Dnah7c;Dnah7b           |        | 0,756786885 | -0,204004288 |
| Ndufs1                  |        | 0,756933967 | 0,591936747  |



Table S2.

|              |             |              |
|--------------|-------------|--------------|
| Hnrnp2       | 0,756943522 | 0,184034348  |
| Ighg2b;lgh-3 | 0,756967742 | -0,251814524 |
| Aifm2        | 0,757016837 | 0,17670695   |
| Tmlhe        | 0,757116809 | -0,147211711 |
| Hist1h1c     | 0,75712319  | -0,100950877 |
| Clic4        | 0,75715222  | -0,066817602 |
| Mtmr6        | 0,757800853 | -0,123833338 |
| Psm6         | 0,760582128 | 0,070327759  |
| Copz1        | 0,761769668 | -0,126850128 |
| Akr1a1       | 0,762733949 | 0,10345459   |
| Map1lc3b     | 0,763598295 | 0,238445918  |
| Prrc1        | 0,76394601  | -0,123466492 |
| Vil1         | 0,764562367 | -0,122445424 |
| Gpx4         | 0,764564127 | -0,220837275 |
| Klc2         | 0,764743371 | -0,220960617 |
| Flii         | 0,764818547 | 0,095791499  |
| Pgm3         | 0,765157048 | 0,112448374  |
| Rdh13        | 0,765319461 | 0,140954336  |
| Stx18        | 0,765476123 | 0,120519002  |
| Rplp0        | 0,766533428 | 0,11376063   |
| Naa40        | 0,76660397  | -0,323343277 |
| Ide          | 0,76663862  | 0,110925039  |
| Nadsyn1      | 0,768358999 | -0,152125676 |
| Dolpp1       | 0,770133648 | 0,331064224  |
| Acot9        | 0,770208913 | 0,081571579  |
| Mxra7        | 0,77028423  | -0,152282079 |
| Ap1ar        | 0,770293396 | -0,197710037 |
| Ephx1        | 0,770346063 | -0,206560771 |
| Cobl         | 0,770422841 | -0,157311757 |
| Alg11        | 0,770453409 | -0,174512227 |
| Hspa13       | 0,770533868 | -0,173954646 |
| Vcp          | 0,771041431 | 0,092867533  |
| Cc2d1a       | 0,771152143 | -0,129581451 |
| Dapk3        | 0,771193784 | 0,086291631  |
| Hyou1        | 0,771333804 | 0,168001811  |
| Ncf2         | 0,771408909 | 0,617612203  |
| Rab2a        | 0,771420099 | 0,14622879   |
| Klk1         | 0,771440151 | 0,349878947  |
| G6pdx        | 0,771888    | -0,10403951  |
| Ndufb7       | 0,772526935 | -0,075833639 |
| Serpini2     | 0,7725381   | 0,916845322  |
| Akr1c12      | 0,773294145 | 0,118476868  |
| Get4         | 0,773406345 | 0,188489914  |
| Fermt1       | 0,773563705 | -0,1853803   |
| Gm10881      | 0,773671992 | 0,567902247  |
| Mtx2         | 0,773812544 | -0,100286484 |
| Hbs1l        | 0,773948333 | 0,09528923   |
| Chchd1       | 0,775193238 | 0,465521495  |
| Cpa1         | 0,775250117 | 0,54538091   |
| Top1mt       | 0,775389815 | -0,163310369 |
| Dnm2         | 0,775492019 | -0,074847539 |
| Uqcc2        | 0,77612758  | -0,166292191 |

Table S2.

|                                        |             |              |
|----------------------------------------|-------------|--------------|
| Zmat2                                  | 0,77622707  | 0,146505992  |
| Usp9x                                  | 0,77694068  | -0,080464045 |
| Obfc1                                  | 0,777065604 | -0,164432526 |
| Ddah2                                  | 0,777134552 | 0,151210785  |
| Xrn2                                   | 0,777247715 | -0,086743037 |
| Mrpl10                                 | 0,777252752 | 0,1920681    |
| Naaa                                   | 0,777742389 | 0,152917862  |
| Stx16                                  | 0,777963483 | -0,169299444 |
|                                        | 0,778035071 | -0,060399373 |
| Oxsm                                   | 0,778125029 | -0,147327423 |
| Vdac1                                  | 0,778171188 | 0,200411479  |
| Upp1                                   | 0,778243743 | -0,119234721 |
| Plec                                   | 0,778303768 | -0,068124135 |
| Thumpd1                                | 0,778425831 | 0,212328593  |
| Dnajb11                                | 0,778772324 | -0,161421458 |
| Prcc                                   | 0,779516935 | 0,158288956  |
| Gstm5                                  | 0,779548598 | -0,114596685 |
| Kiaa1033                               | 0,779623276 | -0,143564224 |
| haemaglobin alpha 2;Hba                | 0,780191499 | -0,300051371 |
| Ndufs3                                 | 0,780505135 | -0,13172849  |
| Tmem19                                 | 0,780636937 | 0,136210759  |
| Inmt                                   | 0,781378763 | 0,303754807  |
| Hist1h2br;Hist1h2bp;Hist1h2bk;Hist1h2k | 0,782018665 | 0,519486109  |
| Cbs                                    | 0,782086307 | 1,112691879  |
| Ccdc47                                 | 0,782317164 | 0,079969406  |
| Vwa9                                   | 0,783270692 | 0,347935359  |
| Ndufab1                                | 0,784899767 | -0,074176153 |
| Bcap29                                 | 0,785646236 | 0,166805903  |
| Dpysl2                                 | 0,7872274   | 0,094216665  |
| Snrpc                                  | 0,787385977 | -0,077482224 |
| Acsf2                                  | 0,787771775 | 0,089129766  |
| Capza1                                 | 0,788223516 | 0,10053126   |
| Pgp                                    | 0,789204001 | -0,134660721 |
| Chchd6                                 | 0,789237785 | 0,125659943  |
| Sult1c2                                | 0,789397254 | -0,395683289 |
| Ap2b1                                  | 0,789581006 | -0,07648468  |
| Scaf8                                  | 0,789745116 | -0,114562988 |
| Lama5                                  | 0,79087561  | -0,102618535 |
| Rpl23a                                 | 0,792234146 | 0,114159266  |
| Lmna                                   | 0,792255576 | -0,08380127  |
| Amdhd2                                 | 0,792269642 | -0,151423772 |
| Add1                                   | 0,79229726  | 0,071546555  |
| Plekha2                                | 0,792362538 | 0,362620672  |
| Mms19                                  | 0,792748549 | -0,145800273 |
| Kdelc2                                 | 0,794171773 | 0,187555949  |
| Gp2                                    | 0,794193548 | 0,455769857  |
| Fbll1                                  | 0,794260264 | 0,146633148  |
| Yars                                   | 0,794291415 | -0,160831451 |
| Eif4e                                  | 0,794912801 | 0,120167414  |
| Cap1                                   | 0,796104799 | 0,067082723  |
| Pin4                                   | 0,796575666 | 0,201510111  |
| Mrpl16                                 | 0,796687993 | -0,146311442 |

Table S2.

|           |             |              |
|-----------|-------------|--------------|
| Vps4b     | 0,796780375 | 0,082852681  |
| Atp6v1g1  | 0,796947709 | 0,124358495  |
| Ifi27l2b  | 0,796964815 | -0,106194814 |
| Lsm1      | 0,797011345 | 0,267982483  |
| Dennd4c   | 0,797039611 | 0,187838236  |
| Gsta3     | 0,797096386 | 0,225227356  |
| Ahnak2    | 0,797195924 | 0,139849345  |
| Pccb      | 0,797397178 | 0,142970403  |
| Serpina3n | 0,797688396 | 0,192478816  |
| Jup       | 0,797764624 | -0,073434194 |
| Pcca      | 0,797796485 | -0,150836309 |
| Ube2i     | 0,798016177 | 0,060587565  |
| Vars      | 0,79815015  | 0,131703695  |
| Ppib      | 0,798224584 | 0,195037206  |
| Vtn       | 0,798828683 | 0,335817337  |
| Tomm7     | 0,79883868  | -0,206824621 |
| Vmp1      | 0,798894834 | -0,092156728 |
| Slc25a11  | 0,798925952 | -0,099247615 |
| Asrgl1    | 0,798953392 | 0,328306834  |
| A1cf      | 0,798999077 | -0,25345548  |
| Dcp1a     | 0,79915493  | -0,180592855 |
| Ube2k     | 0,799163048 | 0,099764506  |
| Cd200     | 0,799597049 | -0,133363724 |
| Rps3a     | 0,800011971 | 0,096558889  |
| Syk       | 0,800070984 | -0,097588857 |
| Tnxb      | 0,800117891 | 0,16361173   |
| Rcn2      | 0,800205435 | 0,087204615  |
| St13      | 0,80023589  | 0,073913574  |
| Prdx3     | 0,800252186 | 0,099582036  |
| Lamtor2   | 0,80037235  | -0,419318517 |
| Akr7a2    | 0,800409666 | 0,115389506  |
| Pfn1      | 0,800478491 | 0,064678192  |
| Fntb      | 0,800549885 | -0,1256663   |
| Mrpl2     | 0,80070545  | 0,138090134  |
| Pcbp2     | 0,800722171 | -0,062253316 |
| Slmap     | 0,803031947 | -0,0977904   |
| Ppp5c     | 0,803230875 | 0,104848862  |
| Sod2      | 0,803236213 | -0,078902562 |
| Arl8b     | 0,803816303 | 0,095702489  |
| Slc7a1    | 0,803945797 | 0,259254456  |
| H6pd      | 0,803993572 | -0,077138901 |
| Hspa12b   | 0,804807886 | -0,103953679 |
| Derl3     | 0,804878093 | -0,123333613 |
| Nid1      | 0,80496264  | 0,058815638  |
| Ube3a     | 0,804965834 | -0,092513402 |
| Tax1bp1   | 0,805066789 | 0,177595139  |
| Grb2      | 0,805080734 | -0,086498896 |
| Itpr1     | 0,805092325 | 0,101970673  |
| Prps1l1   | 0,805123451 | 0,050100962  |
| Mocs2     | 0,805238816 | 0,305164337  |
| Adi1      | 0,805596885 | -0,091653824 |
| Nup98     | 0,805880467 | -0,120347341 |

Table S2.

|               |        |             |              |
|---------------|--------|-------------|--------------|
| Hebp1         |        | 0,806569597 | 0,121949514  |
| Mllt4         |        | 0,807509382 | -0,090224584 |
| Krt8          |        | 0,807694209 | -0,071172078 |
|               | Sep-06 | 0,808762297 | 0,131544113  |
| Col6a2        |        | 0,80920558  | 0,099858602  |
| Eif4a1        |        | 0,809294602 | 0,061585744  |
| Abcg2         |        | 0,809702789 | 0,423622767  |
| Ddrgk1        |        | 0,809947898 | 0,146929423  |
| Slc9a8        |        | 0,810034286 | 0,092359543  |
| Cdk5rap3      |        | 0,811750571 | -0,164686839 |
| Tpm1          |        | 0,811796207 | -0,119715373 |
| Txndc15       |        | 0,811874001 | -0,36890475  |
| Pcdh1         |        | 0,811883105 | 0,126054764  |
| Ckap4         |        | 0,811895867 | 0,076011658  |
| Iba57         |        | 0,812373346 | -0,358575185 |
| Acyp1         |        | 0,813155373 | 0,095168432  |
| Esyt2         |        | 0,81332208  | -0,076416016 |
| Ywhaq         |        | 0,813694482 | -0,049079895 |
| Clint1        |        | 0,813780616 | 0,055061976  |
| Elp3          |        | 0,814484959 | 0,102603277  |
| Rbbp9         |        | 0,814670618 | 0,071028392  |
| Sdr39u1       |        | 0,814984735 | -0,099592845 |
| Sltm          |        | 0,8150041   | -0,105137507 |
| Ctbp2         |        | 0,816163972 | -0,057615916 |
| Ythdf1        |        | 0,816448998 | -0,109861374 |
| Cpsf3         |        | 0,816791259 | 0,108084997  |
| Kpna1         |        | 0,817126991 | -0,178601583 |
| Nbeal2        |        | 0,817685552 | -0,103527069 |
| Ano10         |        | 0,818526268 | 0,054959615  |
| Mrpl30        |        | 0,818639672 | -0,10066096  |
| Pes1          |        | 0,818902068 | -0,094600677 |
| Gm28036;Rbm12 |        | 0,819022283 | -0,159560521 |
| Impdh2        |        | 0,819088182 | -0,063511531 |
| Chd4          |        | 0,819202546 | 0,063317617  |
| Dohh          |        | 0,81929214  | 0,193020503  |
| G6pc          |        | 0,820228026 | -0,242103577 |
| Alg3          |        | 0,820627611 | 0,157677968  |
| Tram1         |        | 0,820638365 | 0,268491109  |
| Dbi           |        | 0,822075352 | 0,199564616  |
| Efhd2         |        | 0,822769231 | -0,134777069 |
| Rab5b         |        | 0,823240988 | 0,113160451  |
| Mthfd2        |        | 0,823264065 | -0,215682348 |
| Tbck          |        | 0,823264232 | -0,221737544 |
| Neur13        |        | 0,823303401 | -0,181180318 |
| Wdr48         |        | 0,82443155  | -0,087447484 |
| Vwa1          |        | 0,825376841 | -0,165120443 |
| Tmod3         |        | 0,825397961 | -0,059574127 |
| Bet1          |        | 0,825564114 | 0,089026769  |
| Anxa5         |        | 0,826296062 | 0,09349378   |
| Pin1;Pin1rt1  |        | 0,826435137 | 0,0855395    |
| Calb2         |        | 0,826530797 | -0,112056732 |
| Aup1          |        | 0,826580674 | 0,072045644  |

Table S2.

|               |             |              |
|---------------|-------------|--------------|
| Ppap2c        | 0,827304977 | -0,196402232 |
| Entpd2        | 0,827425729 | 0,186867396  |
| Pbrm1         | 0,827539471 | -0,088111242 |
| Arpp19        | 0,82758209  | 0,139192581  |
| Itgav         | 0,827914124 | 0,108172099  |
| Zrsr2         | 0,827997288 | 0,253648758  |
| Acss2         | 0,82868685  | 0,081401825  |
| Eif3f         | 0,82893246  | -0,048737208 |
| Ddx47         | 0,82900813  | 0,268149694  |
| Cd68          | 0,829070219 | -0,175824483 |
| Dysf          | 0,82910404  | 0,23575592   |
| Eif3c         | 0,829181038 | -0,060112    |
| Ndufa2        | 0,830333935 | 0,087015152  |
| Pmm2          | 0,830469025 | -0,087151845 |
| Auh           | 0,830482199 | -0,098856608 |
| Atp1a2;Atp1a3 | 0,830669371 | -0,245307922 |
| Actl6a        | 0,830731289 | 0,117670695  |
| Emc7          | 0,830850056 | 0,09344101   |
| Ptpn6         | 0,831013983 | 0,062009811  |
| Pdgfrb        | 0,831063388 | -0,102485657 |
| Asph          | 0,8314      | -0,055915197 |
| Eif4a2        | 0,831519027 | 0,064652125  |
| Ilvbl         | 0,831752364 | -0,099899292 |
| Pfkm          | 0,832157551 | 0,066368103  |
| Slc39a7       | 0,83380378  | 0,34462738   |
| Cpne3         | 0,833831347 | -0,066145579 |
| Carkd         | 0,833962213 | 0,142958323  |
| Hgfac         | 0,834044544 | 0,124579748  |
| Nap1l1        | 0,834347122 | -0,105511347 |
| Sephs2        | 0,834511126 | -0,075656255 |
| Dad1          | 0,834677753 | -0,114853541 |
| Git1          | 0,836371153 | 0,109539032  |
| Xrcc6         | 0,836459119 | -0,087774913 |
| Mgll          | 0,836751853 | 0,051303228  |
| Glrx5         | 0,836880108 | -0,134133657 |
| Tapbp         | 0,837098092 | 0,064005534  |
| Suox          | 0,837546679 | 0,041182836  |
| Dnajc25       | 0,837942114 | -0,083830516 |
| Svip          | 0,838049349 | -0,128426234 |
| Psme3         | 0,839509307 | -0,061101913 |
| Tubg1;Tubg2   | 0,840313004 | -0,100943883 |
| Acad8         | 0,841033849 | -0,115752538 |
| Dab2ip        | 0,841465382 | -0,098092397 |
| Zc3h4         | 0,841476468 | 0,163387299  |
| Galk1         | 0,842896057 | 0,088350932  |
| Rsl1d1        | 0,844021501 | 0,067417781  |
| Hsd17b13      | 0,844111882 | -0,347372055 |
| Itch          | 0,844116409 | -0,061787923 |
| Trim65        | 0,844229288 | 0,073524475  |
| Rhot1         | 0,844300806 | -0,05632782  |
| Psmc6         | 0,845540045 | 0,062484741  |
| Uba1          | 0,847203936 | 0,040859222  |

Table S2.

|             |             |              |
|-------------|-------------|--------------|
| Cox4i1      | 0,847370163 | 0,05900828   |
| Pld4        | 0,847797004 | -0,158088684 |
| Slc43a2     | 0,848608851 | -0,070966721 |
| Pycr1       | 0,848870615 | 0,209927241  |
| Cfb;Gm20547 | 0,849224307 | -0,099754333 |
| Fam98c      | 0,849282109 | -0,068418503 |
| Xab2        | 0,849403305 | -0,153871536 |
| Chmp7       | 0,851814244 | -0,115952174 |
| Hid1        | 0,852177679 | 0,102858861  |
| Hip1        | 0,852297255 | 0,069304784  |
| Gpd2        | 0,853165291 | 0,052440643  |
| Hnf4a       | 0,853182508 | 0,063908895  |
| Espn        | 0,854396967 | -0,090337118 |
| Tcerg1      | 0,854663099 | -0,074995677 |
| Fdx1        | 0,855045029 | 0,084241867  |
| Mul1        | 0,855708491 | -0,096675237 |
| Nudt7       | 0,855721925 | 0,139186223  |
| Metap2      | 0,856629093 | -0,067708333 |
| Adnp        | 0,856993318 | 0,11303393   |
| Cops2       | 0,858292585 | -0,046418508 |
| Arf6        | 0,858629564 | -0,068482717 |
|             | 0,859095482 | -0,092045466 |
| Cox7a2      | 0,859195372 | 0,131345749  |
| Stau1       | 0,859373526 | 0,193169912  |
| Lyz1        | 0,860634342 | 0,111476898  |
| Saa4        | 0,861576701 | 0,242239634  |
| Ppp2r5b     | 0,861745163 | 0,056094488  |
| Tkt         | 0,861768393 | 0,064537048  |
| Lrrn4       | 0,861845333 | 0,218772888  |
| Os9         | 0,862376721 | 0,063067754  |
| Ap2s1       | 0,862425239 | -0,129138311 |
| Mrps18b     | 0,862637655 | 0,062636058  |
| Itsn2       | 0,862642683 | -0,102441788 |
| Pkp2        | 0,862664005 | -0,05286026  |
| Stk4        | 0,862678793 | 0,075866699  |
| Prph        | 0,862749501 | -0,068464915 |
| Syncrip     | 0,86286285  | -0,051596959 |
| Sri         | 0,862875028 | -0,065124512 |
| Ppp6c       | 0,863045001 | -0,072647731 |
| Sfpq        | 0,863124612 | 0,050535838  |
| Hdhd3       | 0,863727011 | -0,065921148 |
| Stt3b       | 0,863874113 | -0,067073186 |
| Tmem86b     | 0,864698272 | -0,356186549 |
| Syn2        | 0,864770764 | -0,108930588 |
| Myh9        | 0,864784418 | -0,047217051 |
| Apoa1bp     | 0,864925393 | 0,129461924  |
| Maob        | 0,864976085 | -0,071678797 |
| Atp6v1e1    | 0,865535738 | 0,059335073  |
| Tmx1        | 0,865887611 | -0,085196177 |
| Itpr3       | 0,866294183 | -0,043264389 |
| Ddx23       | 0,866615657 | 0,062730789  |
| Ndufaf2     | 0,866797258 | 0,076941172  |

Table S2.

|                                |             |              |
|--------------------------------|-------------|--------------|
| Cd151                          | 0,869977905 | -0,075143178 |
| Ppm1h                          | 0,87009107  | -0,290943782 |
| Bola2                          | 0,870124199 | 0,095997492  |
| Ttc1                           | 0,870310954 | 0,160839717  |
| Capns1                         | 0,870503203 | -0,055587133 |
| Fmnl2;Fmnl1                    | 0,870570419 | -0,094199498 |
| Cyb5a                          | 0,870762641 | -0,093357086 |
| Pitrm1                         | 0,870783492 | 0,071147919  |
| Inpp5d                         | 0,871447485 | 0,0692571    |
| Syne1                          | 0,871586237 | 0,196930567  |
| Ddx39a                         | 0,871705272 | -0,092573166 |
| Ctnnb1                         | 0,87187478  | -0,057554881 |
| Arpc3                          | 0,871925942 | 0,095974604  |
| Agk                            | 0,87198677  | 0,074077606  |
| Trappc12                       | 0,872034376 | 0,133893967  |
| Ilk                            | 0,872054638 | 0,044697444  |
| Tbcc                           | 0,872311826 | -0,142921448 |
| Rpl9                           | 0,872412335 | 0,072677612  |
| Anxa3                          | 0,87356583  | 0,061223984  |
| Nudt16                         | 0,873969624 | 0,062955221  |
| Hadhb                          | 0,875275528 | -0,043842316 |
| Pef1                           | 0,875400308 | 0,135486603  |
| Mrpl15                         | 0,875507151 | -0,081987381 |
| Tcea3                          | 0,875520668 | -0,161188126 |
| Sec11a                         | 0,875546074 | -0,099006653 |
| Mrpl23                         | 0,875738671 | -0,087755839 |
| Rad23b                         | 0,876086154 | -0,059302648 |
| Arcn1                          | 0,876486926 | -0,045711517 |
| Zfp947                         | 0,876727592 | -0,408603668 |
| Hist1h2al;Hist2h2aa1;Hist2h2ac | 0,876881862 | -0,191135406 |
| Ppp1cb                         | 0,876971667 | 0,054103851  |
| Ccnh                           | 0,879339917 | -0,137022654 |
| Wdr77                          | 0,879369022 | 0,138392766  |
| Man2a1                         | 0,879468421 | -0,068639119 |
| Nudt3                          | 0,879532924 | 0,11057663   |
| Pagr1a                         | 0,879553411 | -0,086070379 |
| Eno1                           | 0,879680351 | -0,045931498 |
| C530008M17Rik;Kiaa1211         | 0,880235758 | -0,110977173 |
| Fh                             | 0,880297238 | -0,047125498 |
| Mrps21                         | 0,880370094 | -0,157269796 |
| Ahsg                           | 0,880383081 | 0,115662893  |
| Tbl2                           | 0,880718196 | -0,09001859  |
| Col6a1                         | 0,880814183 | -0,060977936 |
| Hint3                          | 0,880833114 | -0,121994019 |
| Pdia4                          | 0,880875657 | 0,065869649  |
| Hist1h1a                       | 0,881003286 | 0,06172053   |
| Gga1                           | 0,881174617 | -0,06440862  |
| Hydin                          | 0,881409757 | 0,132545471  |
| Arl6ip5                        | 0,881486439 | -0,042437871 |
| Nup88                          | 0,881595977 | -0,227359772 |
| Rabgap1l                       | 0,881687295 | -0,08815829  |
| Mocos                          | 0,882523279 | 0,208670934  |

Table S2.

|               |             |              |
|---------------|-------------|--------------|
| Bcap31        | 0,883381119 | -0,04863739  |
| Try10         | 0,884301376 | 0,232028325  |
| Cnot11        | 0,884311053 | -0,136202494 |
| Sppl2a        | 0,884420363 | -0,057148616 |
| Fam20b        | 0,884510044 | -0,104890823 |
| Mta2          | 0,885599825 | 0,050897598  |
| Chdh          | 0,885623745 | -0,099184672 |
| Rpl22l1       | 0,885654962 | -0,145321528 |
| Ppt1          | 0,885771666 | 0,063899994  |
| ORF11         | 0,885777487 | -0,068194071 |
| Gpa33         | 0,886273005 | -0,08068339  |
| Ralgapb       | 0,886664923 | -0,055790583 |
| Thg1l         | 0,888061029 | -0,103916168 |
| Aldh6a1       | 0,889078231 | 0,164808273  |
| Aftph         | 0,890145938 | 0,076000214  |
| Palm          | 0,89015512  | 0,084339142  |
| Arglu1        | 0,890543554 | 0,046789169  |
| Gatad2a       | 0,890831265 | -0,059438705 |
| Gm20441       | 0,891710927 | 0,061507543  |
| Vrk3          | 0,891803264 | -0,078281403 |
| Osbpl1a       | 0,89203653  | 0,112159093  |
| Slc27a2       | 0,892062636 | 0,078231812  |
| Celf1         | 0,892229715 | 0,054466883  |
| Hnrnpm        | 0,892354221 | -0,152276357 |
| Rps7;Gm9493   | 0,893564348 | 0,084136963  |
| Tmed5         | 0,89400739  | 0,097836812  |
| Cops8         | 0,894101695 | 0,061611176  |
| Iqgap1        | 0,894135129 | 0,038941701  |
| Paox          | 0,894428323 | 0,062163035  |
| Eif5b         | 0,894682874 | -0,060184479 |
| Ppp2r5d       | 0,894766558 | -0,0560112   |
| Sssca1        | 0,894823274 | -0,062676112 |
| Opa3          | 0,894924479 | -0,087250392 |
| Nck2          | 0,895449772 | -0,105677923 |
| Dbt           | 0,896619523 | -0,108313243 |
| Ass1;Gm5424   | 0,896907395 | 0,072044373  |
| Nudc          | 0,897615785 | -0,03997612  |
| Scyl2         | 0,897939736 | 0,062648773  |
| Nup50         | 0,898713481 | -0,036485672 |
| H2-Ab1        | 0,899772914 | 0,689419429  |
| Mrps7         | 0,900426343 | -0,0669988   |
| Rock1         | 0,900932207 | -0,044758479 |
| Pkp4          | 0,900936797 | -0,112295787 |
| Lamc1         | 0,901022732 | 0,043060939  |
| Srp68         | 0,901217843 | 0,064961116  |
| Gm9774;Adrm1  | 0,903075659 | -0,049648921 |
| Capza2        | 0,903163314 | -0,035901388 |
| Rpl35;Gm10269 | 0,903163495 | 0,052098592  |
| Zbtb8os       | 0,903251027 | 0,046209335  |
| Ighg3         | 0,903333622 | -0,227384567 |
| Tff3          | 0,903405324 | -0,086596807 |
| Ago2          | 0,904050994 | 0,069024404  |



Table S2.

|             |             |              |
|-------------|-------------|--------------|
| Gls         | 0,904173688 | 0,208260854  |
| Oxnad1      | 0,904179814 | 0,051095327  |
| Tollip      | 0,90607689  | 0,080608368  |
| Srp72       | 0,906443533 | -0,071986516 |
| Lsm2        | 0,906978411 | 0,086048126  |
| Fasn        | 0,907273198 | -0,037481308 |
| Col15a1     | 0,907357652 | 0,064612707  |
| Osgep       | 0,908123409 | 0,049130758  |
| Arfip2      | 0,908495903 | -0,064198812 |
| Aacs        | 0,908589174 | -0,058827082 |
| Abcb8       | 0,908599655 | -0,053986231 |
| Agpat5      | 0,908942444 | -0,084646861 |
| Galm        | 0,909459483 | -0,071489334 |
| Aldh5a1     | 0,910234863 | -0,03399531  |
| Pzp;A2m     | 0,911658768 | 0,058368047  |
| Orm1        | 0,91195524  | 0,073596954  |
| Rtn1        | 0,91212656  | 0,063085556  |
| Rpl10a      | 0,912145533 | 0,056237539  |
| Rrbp1       | 0,912184165 | -0,056634267 |
| Rab1b       | 0,912205901 | -0,039564133 |
| Acaa2       | 0,912341947 | -0,051134745 |
| Arpc2       | 0,912728759 | 0,033984502  |
| Rab6a;Rab6b | 0,912821505 | 0,042565664  |
| Fermt2      | 0,913278865 | 0,03844897   |
| Txn1        | 0,913641445 | -0,053941091 |
| Arih1       | 0,913927359 | -0,082068125 |
| Ighv14-2    | 0,913947595 | -0,332802455 |
| Col18a1     | 0,914027068 | -0,052096685 |
| S100a6      | 0,914056725 | -0,0534935   |
| Fbxo6       | 0,915385871 | 0,076861699  |
| Bgn         | 0,915769    | -0,0554142   |
| Brix1       | 0,917908564 | -0,070753098 |
| Ccdc43      | 0,918305579 | 0,077665329  |
| Lars        | 0,918474147 | 0,049975077  |
| H2-Aa       | 0,918582887 | 0,306191762  |
| Arhgef2     | 0,918779923 | 0,089284261  |
| Dhx30       | 0,920327616 | -0,102294286 |
| Poldip3     | 0,920900129 | 0,046169917  |
| Nid2        | 0,92100493  | 0,033813477  |
| Ss18        | 0,921820908 | -0,06394577  |
| Map7        | 0,921947289 | -0,070232391 |
| Mtap        | 0,921964446 | 0,038584391  |
| Itgb3       | 0,922764026 | -0,030611674 |
| Prpf40a     | 0,923225862 | -0,053935369 |
| Ccl6        | 0,92348887  | 0,077713648  |
| Fmo5        | 0,923830516 | -0,05891482  |
| Abhd14b     | 0,92416     | -0,065260569 |
| Sntb2       | 0,924243902 | 0,048725128  |
| Emc10       | 0,925254063 | -0,058889389 |
| Gtpbp4      | 0,925575369 | 0,035907745  |
| Cdipt       | 0,925853784 | 0,069959005  |
| Npm1;Gm5611 | 0,927029707 | -0,040200551 |

Table S2.

|                            |             |              |
|----------------------------|-------------|--------------|
| Pigo                       | 0,927033333 | 0,041285833  |
| Pcbd1                      | 0,927040376 | 0,085495631  |
| Cars                       | 0,927219991 | -0,073837916 |
| Slc7a7                     | 0,927627589 | -0,066333771 |
| Mrpl24                     | 0,927952208 | 0,090088526  |
| Smg1                       | 0,927974381 | 0,042597453  |
| Sec24a                     | 0,928098934 | -0,120003382 |
| Defa24                     | 0,928150235 | 0,038459778  |
| Brcc3                      | 0,9282508   | 0,036104838  |
| Ric8a                      | 0,92832444  | -0,097873052 |
| Rsu1                       | 0,928361543 | -0,033231099 |
| Hm13;H13                   | 0,928377986 | -0,059882482 |
|                            | 0,928805283 | 0,095602036  |
| Ndufa8                     | 0,92888046  | -0,029068629 |
| Exosc8                     | 0,929059676 | 0,087497075  |
| Cd9                        | 0,929229131 | 0,102725983  |
| Unc45b                     | 0,929248136 | 0,121449788  |
| Pdia3                      | 0,92943581  | -0,022455851 |
| Rabggtb                    | 0,929461047 | 0,141277949  |
| Arhgef16                   | 0,930302979 | 0,046892802  |
| Tbc1d13                    | 0,930382816 | 0,035229365  |
| Acs11                      | 0,930454139 | -0,037452062 |
| Sptlc1                     | 0,930459902 | -0,051266988 |
| Shoc2                      | 0,930797363 | 0,066344579  |
| Sec23ip                    | 0,930934524 | 0,030124664  |
| Exoc1                      | 0,93120442  | 0,120101293  |
| Vps33b                     | 0,931271413 | 0,028401693  |
| Tmed11                     | 0,931450181 | -0,417737961 |
| Pdk2                       | 0,931595582 | -0,041345596 |
| Ehd2                       | 0,931994904 | -0,021222432 |
| Sun1                       | 0,932004244 | 0,076295217  |
| Rabgap1                    | 0,93201868  | 0,039838791  |
| Igkv4-70;lgkv4-59;lgkv4-86 | 0,932080697 | -0,081277847 |
| Rbm10                      | 0,933316928 | -0,036830902 |
| Prss2                      | 0,933411665 | 0,158233643  |
| L2hgdh                     | 0,933424936 | -0,048892975 |
| Dmbt1                      | 0,933466582 | -0,125090281 |
| Ociad2                     | 0,933735001 | 0,030441284  |
| Tmem214                    | 0,935312421 | -0,082899729 |
| Cnot2                      | 0,935418043 | 0,070800145  |
| B2m                        | 0,935462206 | -0,064084371 |
| Anxa4                      | 0,9355018   | -0,034786224 |
| Irf6                       | 0,935676271 | 0,039416631  |
| Gtf2i                      | 0,935706718 | -0,02177302  |
| Fam96a                     | 0,935904318 | 0,115432739  |
| Vti1b                      | 0,93591873  | -0,037517548 |
| Sdc4                       | 0,936314008 | -0,080013275 |
| Tsnax                      | 0,9381392   | 0,024117788  |
| Mug1;Mug2                  | 0,938329949 | -0,057631175 |
| Tmed2                      | 0,938932544 | -0,050711314 |
| Nck1                       | 0,939649894 | 0,04572169   |
| Jund                       | 0,939728713 | -0,088850657 |

Table S2.

|               |             |              |
|---------------|-------------|--------------|
| 0610011F06Rik | 0,939880811 | 0,037215551  |
| Fabp2         | 0,940079476 | -0,05302302  |
| Praf2         | 0,940373469 | 0,052216848  |
| Pgm2          | 0,942062936 | 0,02677536   |
| Reg3b         | 0,94217138  | 0,156745275  |
| Mrps6         | 0,942269426 | 0,050434748  |
| Sms           | 0,942322145 | 0,106150945  |
| Qtrt1         | 0,943319688 | -0,090737661 |
| Gss           | 0,943825353 | -0,023485819 |
| Pcna          | 0,94384135  | 0,058045705  |
| 2210016F16Rik | 0,944186419 | -0,041702906 |
| Cfd           | 0,944457095 | 0,083906174  |
| Fam109a       | 0,944477234 | 0,117848078  |
| Fam136a       | 0,945157429 | -0,057124456 |
| Actr2         | 0,945474616 | 0,021879196  |
| Pter          | 0,945673831 | -0,041248957 |
| Inpp5a        | 0,946484734 | -0,029050191 |
| Ccbl1         | 0,946562592 | 0,029565811  |
| Fam192a       | 0,946620893 | 0,04206721   |
| Naa35         | 0,946668632 | -0,023328145 |
| Tm9sf2        | 0,946685185 | -0,027231216 |
| Gps1          | 0,946824668 | 0,025698344  |
| Dock7         | 0,948188473 | -0,031548818 |
| Lin7c         | 0,948699454 | -0,026383718 |
| Slc51a        | 0,94882489  | 0,064737956  |
| Ccdc91        | 0,948844407 | 0,08729744   |
| Rps25         | 0,948847108 | -0,046782811 |
| Acy3          | 0,949156545 | 0,048041662  |
| Sc5d          | 0,949242017 | -0,056406657 |
| Mpp1          | 0,949505566 | 0,030394872  |
| Plg           | 0,949850157 | -0,047363917 |
| Insr          | 0,94993199  | 0,058437983  |
| Gca           | 0,95001008  | -0,038606008 |
| Tmem109       | 0,950014697 | -0,046085358 |
| C5            | 0,95038355  | 0,030230204  |
| Ube2o         | 0,950646528 | 0,060469945  |
| Mfsd10        | 0,951910235 | -0,127775828 |
| Trim2         | 0,951979031 | -0,04923439  |
| Eftud2        | 0,952384744 | 0,021448771  |
| Stxbp5        | 0,952419199 | -0,018892288 |
| Lama2         | 0,952549266 | 0,054217021  |
| Rab3ip        | 0,952553949 | 0,037799199  |
| Psmb8         | 0,953357068 | -0,013142268 |
|               | 0,953483871 | 0,044867198  |
| Myo1b         | 0,954747069 | -0,027657827 |
| Cryab         | 0,954913125 | 0,045883179  |
| Cdh17         | 0,955165341 | 0,020640055  |
| Ptgr2         | 0,955528772 | 0,029930115  |
| Lgmn          | 0,955539749 | 0,025962194  |
| Akr1b1        | 0,955793392 | 0,019005458  |
| Igkv9-124     | 0,955805898 | -0,186002096 |
| Mrpl43        | 0,95673913  | -0,050177892 |

Table S2.

|                                        |             |              |
|----------------------------------------|-------------|--------------|
| Gstp1;Gstp2                            | 0,956779427 | 0,032114665  |
| Idh3g                                  | 0,957860815 | 0,022096634  |
| Mcam                                   | 0,958160468 | 0,023121516  |
| Hist1h2bc;Hist2h2bb;Hist1h2bh;Hist1h2l | 0,958941299 | -0,021251678 |
| Luc7l2                                 | 0,958998329 | 0,016963959  |
| Nono                                   | 0,959483817 | -0,027441025 |
| Ighv4-1                                | 0,959583299 | 0,069180806  |
| Aip                                    | 0,960161937 | -0,018332799 |
| Hsp90b1                                | 0,960241286 | -0,02302297  |
| Hexa                                   | 0,960452138 | -0,040749232 |
| Abcb10                                 | 0,960460576 | -0,048604329 |
| Ttc9c                                  | 0,960590862 | -0,028320948 |
| Map2k6                                 | 0,961043369 | 0,071922302  |
| Slc35e1                                | 0,961459245 | 0,047270457  |
| Khk                                    | 0,96168215  | 0,19372495   |
| Dnajb1                                 | 0,9616875   | 0,01806132   |
| Atp1a1                                 | 0,961804543 | 0,018807729  |
| Rps4x                                  | 0,961979158 | 0,02589035   |
| Sec61a1;Sec61a2                        | 0,962286904 | 0,037380854  |
| Ighv7-3;Ighv7-2                        | 0,962442316 | 0,074417114  |
| Cdk7                                   | 0,962761865 | 0,024194082  |
| Abhd16a                                | 0,963308221 | -0,03501002  |
| Pura                                   | 0,963530587 | 0,011833827  |
| B4galt1                                | 0,963802788 | 0,025587718  |
| Ighv10-1;Ighv10-3                      | 0,964425125 | -0,048823039 |
| Faf1                                   | 0,964798503 | -0,035756429 |
| Hck                                    | 0,96483659  | -0,032180786 |
| Psmc3                                  | 0,965257119 | -0,016542435 |
| Scaf11                                 | 0,965268495 | 0,021458944  |
| Tmem87a                                | 0,96540536  | 0,05315272   |
| Cntnap5c                               | 0,965423884 | 0,078005473  |
| Cbx1                                   | 0,965569442 | 0,034443537  |
| Jak1                                   | 0,965624429 | -0,036840439 |
| Mapk3                                  | 0,965714286 | -0,030275981 |
| Ppp2ca                                 | 0,965755551 | -0,017084122 |
| Mroh1                                  | 0,96577418  | 0,06214269   |
| Nudt2                                  | 0,965881328 | 0,039800644  |
| Cyp20a1                                | 0,966536181 | -0,028239568 |
| Ctr9                                   | 0,966556616 | -0,031298319 |
| Acox3                                  | 0,96668409  | -0,027472814 |
| Hsd17b13                               | 0,96744799  | -0,102136612 |
| Srsf11                                 | 0,967501243 | 0,024714788  |
| Gnai1                                  | 0,96753658  | 0,032295863  |
| Vamp7                                  | 0,967570748 | -0,040086746 |
| Lman2                                  | 0,967608624 | 0,012759527  |
| Bsg                                    | 0,968182909 | -0,018810908 |
| Dhcr24                                 | 0,968209437 | 0,020605723  |
| Rab3gap2                               | 0,968249224 | -0,021774292 |
| Babam1                                 | 0,968263964 | 0,015858332  |
| Mtatp8                                 | 0,968279628 | 0,024113337  |
| Rpn2                                   | 0,968289087 | 0,022969564  |
| Pygm                                   | 0,968449689 | 0,025322596  |

Table S2.

|                     |             |              |
|---------------------|-------------|--------------|
| Tbc1d1              | 0,968490488 | 0,052918116  |
| Ankrd13a            | 0,969062642 | -0,052774429 |
| Cpe                 | 0,969074824 | 0,032443364  |
| Azgp1               | 0,969675553 | -0,069948196 |
| Ndufa11             | 0,970031812 | 0,023691813  |
| Ampd3               | 0,970136307 | 0,023999532  |
| Gtf3c4              | 0,970144628 | 0,06252861   |
| Cmpk1               | 0,972102416 | 0,013630549  |
| Pycr2               | 0,972270851 | 0,025499344  |
| Slc25a51            | 0,972510305 | 0,020249685  |
| Rps6ka3             | 0,972543016 | -0,01264445  |
| Kpna6               | 0,972548115 | 0,015484492  |
| Pdxk                | 0,972580272 | -0,036881765 |
| Grwd1               | 0,972639868 | -0,027048747 |
| Pm20d1              | 0,972690452 | -0,04384613  |
| H2afy2              | 0,972780528 | 0,018274943  |
| Igkv1-135;Igkv1-133 | 0,972781011 | 0,048659007  |
| Clu                 | 0,972790928 | -0,052336375 |
| Smarca4             | 0,97285932  | -0,012941996 |
| Commd2              | 0,973016893 | -0,021993637 |
| Gpi                 | 0,973976936 | -0,013299306 |
| Ptges3              | 0,975496912 | 0,016791026  |
| Apip                | 0,975566811 | 0,047499339  |
|                     | Sep-10      | 0,02222379   |
| Prpf8               | 0,97625602  | 0,011184692  |
| Cdk1                | 0,976630757 | 0,038849513  |
| Cnn3                | 0,976758111 | 0,02063179   |
|                     | 0,976831585 | 0,063369751  |
| Spg7                | 0,976838643 | 0,007837296  |
| Rqcd1               | 0,976888889 | 0,028296153  |
| Plekhf2             | 0,976947412 | 0,035147349  |
| Ssb                 | 0,977011315 | 0,009916306  |
| Tmf1                | 0,977013575 | -0,031407674 |
| Rbp1                | 0,977076355 | 0,027977626  |
| Serpina1a;Serpina1c | 0,977080748 | 0,019730886  |
| Mapkapk2            | 0,97708412  | 0,016279221  |
| Fam63a              | 0,977129026 | -0,011530558 |
| Hnrnpr              | 0,977152487 | 0,013601939  |
| H2-D1               | 0,977188257 | -0,022406896 |
| Npepl1              | 0,97728463  | -0,01563708  |
| Parp1               | 0,97767398  | -0,01508077  |
| Ppil1               | 0,977837572 | 0,014932632  |
| Gars                | 0,977923739 | -0,014754613 |
| Gmps                | 0,978156871 | -0,005628586 |
| Nup214              | 0,97820373  | 0,013284683  |
| Snx27               | 0,978226137 | 0,018526077  |
| Snrpe               | 0,978327049 | -0,020694733 |
| Gucy1a3             | 0,978378378 | -0,016970952 |
| Etfa                | 0,978426552 | -0,009568532 |
| Cops6               | 0,978874923 | -0,010392507 |
| Nucb1               | 0,979209169 | -0,01020813  |
| Ppwd1               | 0,980572949 | -0,009104411 |

Table S2.

|              |             |              |
|--------------|-------------|--------------|
| Rhoa         | 0,980754239 | -0,010300954 |
| Ssr1         | 0,980871271 | -0,028636297 |
| Pak1         | 0,980967294 | -0,012304942 |
| Hibadh       | 0,980978541 | -0,012287776 |
| Nme1         | 0,98108347  | -0,017651876 |
| Gnai2        | 0,981110247 | 0,007921219  |
| Ppp1r2       | 0,981143558 | -0,011388143 |
| Adk          | 0,981167859 | 0,020469666  |
| Mars         | 0,981260621 | 0,009424845  |
| Stambp       | 0,981577292 | 0,031632741  |
| Usp14        | 0,982163332 | 0,007108053  |
| Kat7         | 0,982907532 | -0,014056524 |
| Tjp1         | 0,983189884 | 0,007617315  |
| Nsdhl        | 0,983269984 | 0,007663727  |
| Sart1        | 0,983390453 | 0,017649968  |
| Pex6         | 0,983408163 | -0,013223012 |
| Lcp1         | 0,983544583 | -0,006579081 |
| Itgb1        | 0,983956796 | -0,005999247 |
| Sar1a        | 0,984113331 | 0,013173421  |
| Ppp1ca       | 0,984269113 | 0,007432302  |
| Ostc         | 0,984303178 | -0,024336497 |
| Dis3         | 0,984342625 | 0,016827265  |
| Mrpl44       | 0,984474231 | -0,01180013  |
| Mcat         | 0,984475376 | 0,009986242  |
| Ddost        | 0,984503155 | 0,009159724  |
| Herc4        | 0,984661238 | 0,00949351   |
| Rab5c        | 0,984769043 | -0,008760452 |
| Psma5;Gm8394 | 0,984825061 | 0,008927663  |
| Rnaseh2b     | 0,984834655 | -0,009230932 |
| Pgrmc1       | 0,984861739 | -0,009346008 |
| Tpm2         | 0,985079301 | -0,015509288 |
| Cyp27a1      | 0,985651555 | -0,020965576 |
| C1galt1      | 0,986309756 | -0,008492152 |
| Hdgfrp3      | 0,987476529 | -0,00418663  |
| Dhx9         | 0,987804304 | 0,005609512  |
| Scaf4        | 0,987808247 | 0,006905238  |
| Dpagt1       | 0,987827782 | 0,008902232  |
| Cdh13        | 0,987857143 | -0,015179952 |
| Ado          | 0,987910696 | 0,007707596  |
| Lims1        | 0,987948936 | -0,004630407 |
| Dhx36        | 0,98798781  | 0,015252431  |
| Aass         | 0,988004873 | -0,015753428 |
| Vwa5a        | 0,988006486 | -0,0035127   |
| Mcmbp        | 0,988070603 | -0,014859517 |
| Lsm8         | 0,9880746   | 0,007789612  |
| Psmb7        | 0,988145985 | -0,008042653 |
| Fubp3        | 0,988230146 | 0,003497442  |
| Eif4g1       | 0,988325289 | 0,004491806  |
| Bod1l        | 0,988486004 | 0,031203588  |
| Coasy        | 0,988779599 | -0,002854029 |
| Surf4        | 0,988845687 | 0,006999969  |
| Sh3bgr       | 0,988908502 | -0,018702825 |

Table S2.

|             |             |              |
|-------------|-------------|--------------|
| Tmem126a    | 0,988911116 | 0,004566193  |
| Skp1        | 0,988921085 | 0,004147212  |
| Lmnb1       | 0,989005469 | -0,004849116 |
| Ahcy        | 0,989225976 | 0,007541656  |
| Yme1l1      | 0,989316343 | -0,005468369 |
| Plgrkt      | 0,989528817 | 0,006897608  |
| Atad3       | 0,990046907 | -0,003859838 |
| Bphl        | 0,991779349 | 0,004576365  |
| Col6a3      | 0,991928037 | 0,004014333  |
| Ampd2       | 0,99197979  | 0,00918897   |
| Ddx6        | 0,992186667 | -0,003107707 |
| Sf3b4       | 0,992342557 | -0,005438487 |
| Pla2g4a     | 0,992394992 | 0,002829234  |
| Csde1       | 0,993223501 | 0,003044764  |
| Fxr1        | 0,993550262 | -0,003247579 |
| Oxsr1       | 0,99491929  | 0,00373141   |
| Galnt1      | 0,994974773 | 0,002575556  |
| Ndufb3      | 0,995333871 | 0,001532237  |
| Ubl4a       | 0,995372454 | -0,00159963  |
| Gtf2e2      | 0,995573215 | 0,003348668  |
| Scgb2b2     | 0,995606213 | -0,010388056 |
| Arrb1       | 0,996801451 | -0,003163656 |
| Nek9        | 0,996951844 | 0,001483917  |
| Manf        | 0,99700524  | 0,001948675  |
| Rac1;Rac3   | 0,997272361 | -0,001633962 |
| Mfap2       | 0,997693919 | 0,003200531  |
| Fbxl8       | 0,997786103 | 0,001401265  |
| Dhfr        | 0,99803181  | 0,001079559  |
| Snrpb;Snrpn | 0,998661836 | 0,000431061  |
| Psm4        | 0,999512274 | -0,00021553  |
| Pcyox1      | 0,999574965 | 0,000301997  |
