# Supplementary material for: HUWE1 is a critical colonic tumour suppressor gene that prevents MYC signalling, DNA damage accumulation and tumour initiation
Source: PubMed Central journal article supplement (PMC5286368; doi:10.15252/emmm.201606684), 2016-12-22
Supplement: EMMM-9-181-s004.pdf [file EMMM-9-181-s004.pdf]

Figure 5A

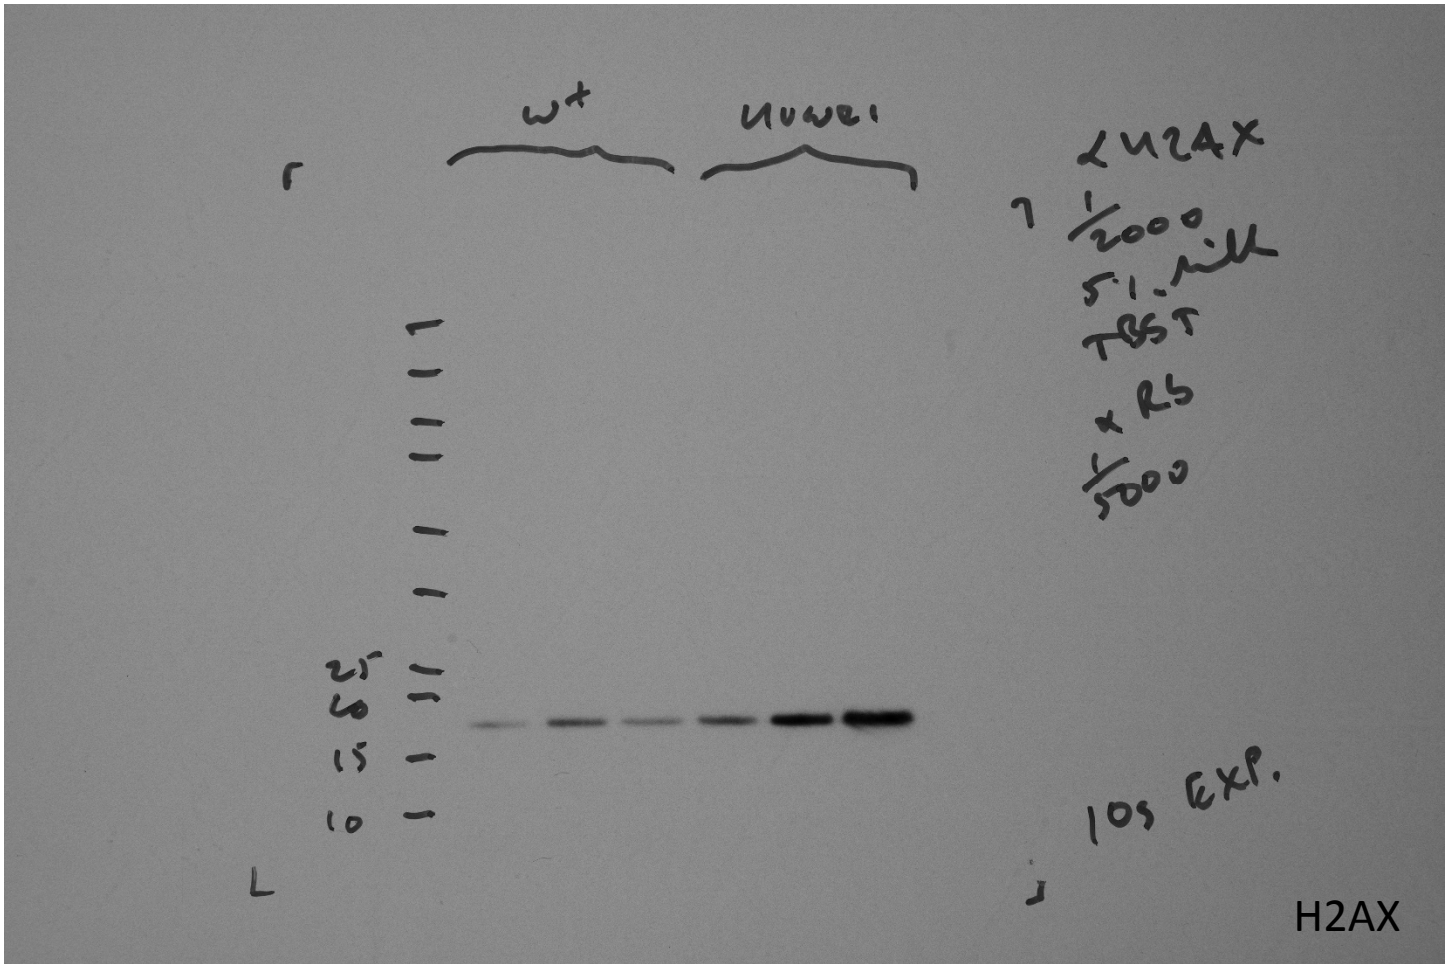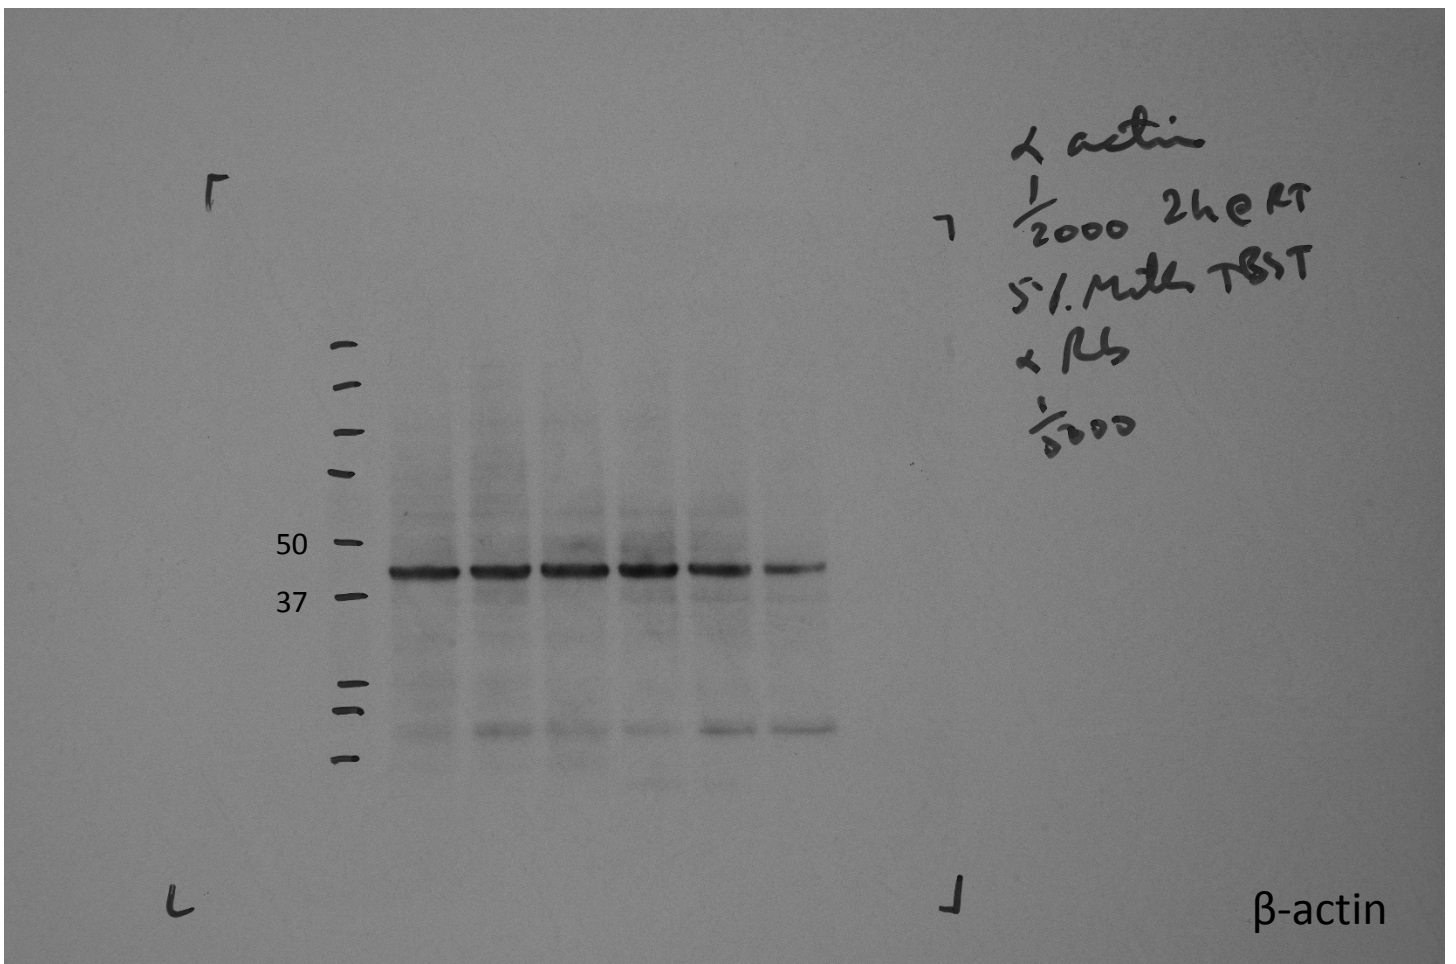

Figure 5C

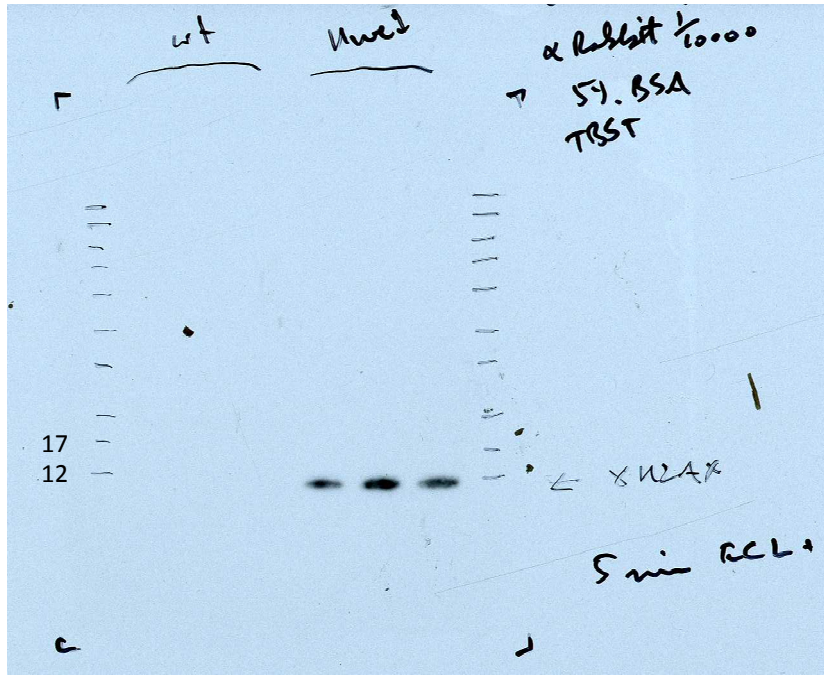

$\gamma$ -H2AX

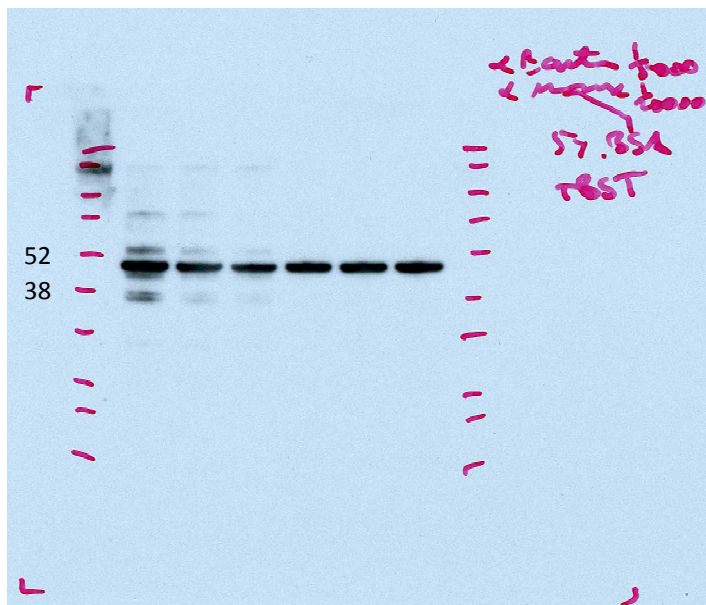

$\beta$ -actin
